# Supplementary material for: Malaria prevalence and incidence in an isolated, meso-endemic area of Mozambique
Source: PeerJ. 2015 Nov 5;3:e1370. doi: 10.7717/peerj.1370 (PMC4647567; doi:10.7717/peerj.1370)
Supplement: Data S1 [file peerj-03-1370-s003.xls]

## Sheet: Pessoas
# Casa	Nome	Birth date	age group	Sexo	Net	PIN	Educacao
7010	Dario Antonio	2006-11-07	1	m	s	26
7105	Dercio Oliveira	2006-05-16	1	m	n	212
7145	Yurca Pedro	2006	1	f	n	244
7150	Anacleta Renaldo	2006	1	f	n	252
7214	Edson Ronaldo	2006	1	m	n	172
7223	Fatima Andre	2006	1	f
7232	Admiro Antonio	2006	1	m	n
7237	Renalda Candido	2006	1	f	n
7302	Linda Anibal	2006	1	f		96	5
7325	Olivia Antonio	2006	1	f	s
7352	Zulfa Izidro	2006	1	f	n
7374	Biernete James	2006	1	f	s
7403	Ilva Alberto	2006	1	f	n	202	0
7411	Elsa Eulidio	2006	1	f	n
7464	Ana ernesto	2006	1	f	n
7474	Emilia Manuel	2006	1	f	n
7612	Edson Daniel	2006	1	m	n
7677	Saldita Manuel	2006	1	f	n
7062	Delcia Osvaldo	2005	2	f	n	214
7083	Milton Raul	2005	2	m	n	192
7109	Fernando Afonso	2005*	2	m	n	190
7115	Elton Francisco	2005	2	m	n
7149	Ilodia Venancio	2005	2	f	n	250
7179	Carvalinho Fernando	2005	2	m	s
7206	Luria Filipe	2005-02-05	2	f	n	164
7260	Chelcia Antonio	2005-02-26	2	f	n
7324	Eldia Sergio	2005	2	f	n
7328	Edmilson Jose	2005	2	m	n
7341	Constantino Jose	2005	2	m	s
7342	Eurola Valdimiro	2005-12-18	2	f	n
7345	Juvencio Edmundo	2005-01-08	2	m	n
7353	Adercio Izidro	2005	2	m	n
7380	Neusa Paulo	2005*	2	f	s
7422	Valodio Emidio	2005	2	m	n
7485	Albino Augusto	2005	2	m	n
7492	Edson J.Damiao	2005	2	m	n
7626	Delefina Antonio	2005	2	f	n
7646	Guilermina Amancio	2005	2	f	n
7703	Erminio Ermenegildo	2005	2	m	n
7001	Ridson Lucio	2004	3	m	s	P003	0
7065	Edno Luisa	2004-05-23	3	m	n	221
7070	Luisa Carlos	2004	3	f	n	146
7175	Juvencio Gama	2004	3	m	n
7209	Junior Joaquim	2004	3	m	n	91
7279	Edson Caetano	2004*	3	m	n
7289	Juvencia Luis	2004*	3	f	n
7304	Roberto Carlos	2004	3	m	n
7308	Laura Banguela	1944	3	f	n		2
7309	Aissa Simalgi	2004	3	f	n
7413	Advenia Juliao	2004	3	f	n
7466	Ernesto J.Ernesto	2004	3	m	n
7470	Edilson Sergio	2004	3	m	n
7619	Ilodia Carlos	2004	3	f	n
7699	Edmilson Francisco	2004	3	m	n
7083	Paulo Dercio	2003	4	m	n
7118	Acacio Genoveva	2003-02-11	4	m	n
7151	Anabela Armaldo	2003	4	f	n	255
7176	Cristino Amade	2003-08-20	4	m	n
7187	Alirio Rui	2003*	4	m	n	108
7201	Isabel Nelson	2003	4	f	s	81
7203	Albertina Vasco	2003-06-09	4	f	n	84
7223	Assucena Andre	2003	4	f
7231	Candido Americo	2003	4	m	s
7240	Yuran Gracio	2003*	4	m	s
7279	Vina Caetano	2003*	4	f	n		1
7303	Titinha Anibal	2003	4	f	n	100
7325	Arcenio Antonio	2003	4	m	n
7337	Claudencia Zildo	2003	4	f	s
7373	Edimundo Ranito	2003-03-25	4	m
7380	Jakson Paulo	2003	4	m	s
7411	Sergio Eulidio	2003	4	m	n
7422	Armando Ivone	2003	4	m	n
7426	Neia Rodrigues	2003-05-05	4	f	n	502
7436	Olivia Galvao	2003-04-02	4	f	n	545
7449	Leonilde Daissa	2003	4	m	n
7474	Ercidio Manuel	2003	4	m	n
7474	Milton Manuel	2003	4	m	n
7694	Jucrancia Jorge	2003	4	f
7703	Raufo Ermenegildo	2004	4	m	n
7008	Lindinha Anselmo	2002-09-13	5	f	s	20
7013	Tshefe Alves	2002*	5	m	s	30	0
7031	Riston Adelto	2002-02-01	5	m	s	71	0
7062	Agnaldo Osvaldo	2002	5	m	n	213
7267	Sergio Luis	2002	5	m	n
7279	Minoca Caetano	2002*	5	f	n		3
7289	Nelcia Luis	2002*	5	f	n
7435	Nuro Galvao	2002-05-20	5	m	n
7453	Joana Luis	2002	5	f	n		1
7456	Anastancia Leonardo	2002	5	f	n	111	0
7622	Jose Brito Antonio	2002	5	m	n
7678	Cacilda Manuel	2002	5	f	n		1
7002	Leonardo Afonso	2001-09-10	6	m	n	P007	1
7009	Quinita Anselmo	2001-03-03	6	f	n	21
7011	Agnesio Antonio	2001-03-17	6	m	n	27	0
7013	Evaristo Alves	2001*	6	m	s	32	1
7057	Iolanda Nelson	2001	6	f	n		1
7064	Adelaide Alberto	2001	6	f	n	218
7096	Edmundo Ventura	2001	6	m	n	228
7151	Banito Arnaldo	2001	6	m	n	256
7209	Ana Joaquim	2001	6	f	n	92	1
7223	Rodolfo Andre	2001	6	m
7235	Dadva Pedro	2001	6	f	n	343	1
7240	Noemia da Erminia	2001*	6	f	s
7251	Tina Januario	2001	6	f	n
7264	Edmilson Augusto	2001-09-02	6	m	n
7305	Belsonia Carlos	2001	6	f	s	323
7325	Regina Antonio	2001	6	f	n
7327	Angelo Antonio	2001	6	m	n		1
7336	Lucia Zildo	2001	6	f	n
7348	Maria Sergio	2001	6	f	s		1
7377	Arcenio Herculano	2001-11-25	6	m	n	90
7387	Tunelca Sumalgi	2001-10-16	6	f	n	324	1
7422	Elton Emidio	2001	6	m	n		1
7472	Edmilton Manuel	2001	6	m	n
7473	Delto Agostinho	2001	6	m	n
7492	Beatriz da Maura	2001	6	f	n	338	1
7645	Gildo Armando	2001	6	m	n		3
7697-1	Francisco Jorge	2001	6	m	n		2
7005	Suzete Anselmo	2000*	7	f	n	15	2
7065	Tina Sergio	2000-08-26	7	f	n	220
7140	Teofelo Momade	2000	7	m	n	232	1
7149	Bevinda Venancio	2000	7	f	n	249	1
7185	Carlos Dekeis	2000*	7	m	n	103	2
7192	Juvencio Tiago	2000	7	m	n
7197	Gercio Eduardo	2000-02-26	7	m	n		2
7221	Indercia Valdiz	2000	7	f	n	468	1
7224	Sergio Jaime	2000	7	m	s		1
7231	Fernando Americo	2000	7	m	s		1
7232	Inercio Gilberto	2000	7	f	n		2
7258	Lucia Jose	2000-12-08	7	f	n	340	1
7289	Maria Luis	2000*	7	f	n		3
7303	Ofelia Anibal	2000	7	f	n	99	2
7353	Tereza Izidro	2000	7	f	n
7355	Atonieta Joao	2000	7	f	n
7361	Mariamo da Silva	2000	7	f	n	385	3
7363	Ana Joao	2000	7	f	n	469	1
7405	Elio Carlos	2000	7	m	n		0
7411	Atanacia Eulidio	2000	7	f	n	495	2
7413	Edmilson Juliao	2000	7	m	n
7453	Jorge Luis	2000	7	m	n		1
7462	Euclidio Armano	2000	7	m	n	463	1
7470	Mercia Sergio	2000	7	f	n		2
7474	Odecia Manuel	2000	7	f	n		2
7488	Joaquina Ricardo	2000	7	f	n		1
7662	Arnaldo Salomao	2000	7	m	n		2
7703	Adelto Ermenegildo	2000	7	m	n		1
7708	Edson Felizberto	2000	7	m	n
7480-1	Jessica januario	2000	7	f	n		3??
7060	Iolanda Feliz	1999-08-07	8	f	n		2
7084	Florinda Antonio	1999	8	f	n		2
7086	Marcelino Joaquim	1999-01-04	8	m	n		2
7103	Paito Jose	1999*	8	m	n	482	2
7118	Efigenia Genoveva	1999-09-26	8	f	n		2
7119	Belinha Tomas	1999	8	f			2
7146	Bevinda Felisberto	1999	8	f	n	262	1
7198	Antonio Joao	1999	8	m	n		2
7228	Raul Sebastiao	1999	8	m	n	476	1
7232	Antonio Arlindo	1999	8	m	n		2
7237	Miguel Eduardo	1999*	8	m	n		1
7307	Adelto Fernando	1999	8	m	n	322	2
7361	Iolanda da Silva	1999	8	f	n	452	4
7377	Etelevino Herculano	1999	8	m	n		1
7415	Argentina da Angelica	1999*	8	f	n		3
7466	Mileniu Ernesto	1999	8	m	n		2
7630	Marta Ernesto	1999	8	f	n		4
7700	Ofelia Bernardo	1999	8	f	n		3
7009	Gercia Anselmo	1998*	9	f	n	23	3
7055	Otilio Antonio	1998	9	m	n	209	2
7109	Taila Afonso	1998*	9	f	n	420	4
7112	Madalena Chico	1998-08-20	9	f	n		3
7185	Antonio Afonso	1998*	9	m	n	102	5
7187	Carlos Rui	1998*	9	m	n	368	3
7198	Baptista Joao	1998	9	m	n		3
7202	Laura Armando	1998-02-08	9	f	n	94	3
7205	Otilia Carlos	98	9	f	n	87	3
7207	Otilia Carlos	1998*	9	f	n		3
7208	Antonio Filipe	1998*	9	m	n	390	3
7235	Nilda Jose	1998	9	f	n	339	1
7236	Dagno Jose	1998	9	m	n		2
7236	Juvencio Jose	1998	9	m	n	418	2
7286	Felizarda Joao	1998	9	f	n		2
7286	Rute Joao	1998	9	f	n		2
7286	Juvencio Afonso	1998	9	m	n		2
7303	Pascoal Anibal	1998	9	m	n	98	2
7305	Nelia Carlos	1998	9	f	s	419	2
7336	Nelcia Zildo	1998	9	f	n		2
7347	Inocencia Sergio	1998	9	f	s		2
7363	Palmira Sergio	1998	9	f	n		2
7365	Evenilda Antonio	1998	9	f	n		1
7373	Gessica Feliz	1998-05-30	9	f
7415	Silvia Felizberto	1998-04-28	9	f	n	402	4
7436	Ivo Galvao	1998	9	m	n	336	2
7627	Juvencio Antonio	1998	9	m	n		2
7676	Euridic Xaxai	1998	9	f	n		4
7703	Julio Ermenegildo	1998	9	m	n		1
7003	Juvencia Afonso	1997-02-03	10	f	n	P004	3
7050	Dalsandra Admiro	1997*	10	f	n	203	3
7069	Joao Bernardo	1997	10	m	n		4
7097	Maninha da Sandra	1997-07-13	10	f	n		4
7138	Iolando Jorge	1997	10	f	n		3
7140	Otilia Manuel	1997	10	f	n	233	3
7149	Josefa Augusto	1997	10	f	n	246	3
7175	Antonio Filipe	1997	10	f	n		4
7200	Ivania Alfredo	1997*	10	f	n	76	3
7200	Bevinda Alfredo	1997*	10	f	n	77	3
7237	Rita Eduardo	1997*	10	f	n		4
7253	Lino Jovito	1997*	10	m	n	335	4
7255	Eulalia Lucio	1997-07-09	10	f	n		5
7261	Micaela Suleimane	1997*	10	f	n
7264	Marla Augusto	1997-04-07	10	f	n		4
7328	Cacilda Baptista	1997	10	f	n		4
7329	Maria Jose	1997	10	f	n		4
7353	Alex Izidro	1997	10	m	n	365	3
7373	Ana Joao	1997	10	f
7377	Florentina Jordao	1997-01-25	10	f	n	109	3
7417	Ivone Manuel	1997*	10	f	n		5
7430	Carolina Hmberto	1997	10	f	n		3
7470	Marta Sergio	1997	10	f	n		4
7473	Anastancia Agostinho	1997	10	f	n		4
7488	Leona Ricardo	1997	10	f	n		3
7488	Leodercio Felisberto	1997	10	f	n		4
7496	Nicolau Rui	1997	10	m	n		3
7619	Lucrencia Alfredo	1997	10	f	n		4
7622	Florencio Antonio	1997	10	m	n		3
7005	Maria Pedro	1996*	11	f	n	14
7074	Anastancia Lazaro	1996	11	f	n	434	5
7087	Juvencio Joaquim	10/8/96!	11	m	n
7185	Aderito Afonso	1996-01-04	11	m	n	178	4
7192	Jose Tiago	1996	11	m	n		4
7208	Raul Filipe	1996*	11	m	n	417	3
7222	Aparicio Valdiz	1996	11	m	n	406	3
7269	Lutercia Eduardo	1996-10-28	11	f	n	449	5
7306	Dercio Carlos	1996	11	m	n	445	4
7322	Paulo Antonio	1996	11	m	n		4
7365	Oria Joao	1996	11	f	n	453	3
7371	Alcidio Baptista	1996	11	m	n		3
7437	Antonio Galvao	1996-05-26	11	m	n		2
7460	Alberto Francisco	1996	11	m	n	415	3
7627	Anibal Antonio	1996	11	m	n		4
7641	Adelto Luis	1996	11	m	n		3
7644	Amelia Alberto	1996	11	f	n		3
7676	Angelo Xaxai Junior	1996	11	m	n		6
7678	Mario Manuel	1996	11	m	n		4
7605-2	Gina Fernando	1996*	11	f	n		3
7013	Luis Afonso	1995*	12	m	s	301	2
7023	Gomes Paulo	1995-06-13	12	m	s	58	2
7027	Nina Galvao	1995*	12	f	n	63	5
7052	Osvaldo Valdez	1995	12	m	n	204	3
7077	Joana Caetano	1995-10-03	12	f	n	359	2
7078	Gonsalves Caetano	1995*	12	m	n	363	4
7084	Joana Caetano	1995	12	f	n		2
7110	Paulo Afonso	1995	12	m	n	456	4
7138	Melita Jorge	1995	12	f	n		4
7160	Melinda Americo	1995	12	f	n	272	3
7174	Paulo Americo	1995	12	m	n		4
7175	Raul Filipe	1995	12	m	n		4
7200	Luisa Emidio	1995-08-11	12	f	n	78	4
7216	Vanansa Joaquim	1995*	12	f	n		3
7253	Florencio Jovito	1995*	12	m	n		5
7336	Belugencia Zildo	1995	12	f	n		4
7349	Virgilio Sergio	1995	12	m	n		4
7354	Tereza Pedro	1995	12	f	n	372
7365	Ricardina Antonio	1995	12	f	n
7373	Amelia Fernando	1995	12	f
7462	Leonor Tomas	1985	12	f	n		7
7473	Esperanca Agostinho	1995	12	f	n		6
7639	Inocencia Admiro	1995	12	f	n		5
7721	Augusto Pedro	1995	12	m	n		5
7480-1	Dalia Herculano	1995	12	f	n		5
7030	Alfeu Lino	1994-05-16	13	m	n	66	4
7050	Olimpia Admiro	1994*	13	f	n	202	5
7055	Maria Sebastiao	1994	13	f	n	208	4
7072	Jozeldo Joao	1994	13	m	n		5
7084	Belinha Caetano	1994	13	f	n		4
7093	Menalda Salvador	1994*	13	f	n		7
7097	Jose Luis	1994	13	m	n	225	4
7112	Preciosa Chico	1994-01-12	13	f	n		4
7113	Preciosa Gildo	1994	13	f	n	421	5
7149	Rosa Venancio	1994	13	f	n	245	4
7173	Nelson Americo	1994	13	m	n		5
7192	Pedro Alberto	1994	13	m	n		4
7198	Marta Joao Rafael	1992	13	f	n
7216	Lucrencia Joaquim	1994*	13	f	n		4
7236	Ivo Maria	1994	13	m	n		6
7239	Lepoldina Guilhermina	1994*	13	f	s		6
7303	Nelia Anibal	1994	13	f	n		5
7307	Juvenalda Felizarda	1994	13	f	n	321	5
7313	Osvalda Joao	1994	13	f	n	459	4
7353	Xavier Izidro	1994	13	m	n		4
7365	Amina Antonio	1994	13	f	n		5
7371	Emidio Antonio	1994	13	m	n		5
7406	Nilza Jorge	1994	13	f	n		4
7453	Guilherme Joao	1994	13	m	n		0
7488	Irene Ricardo	1994	13	f	n		4
7496	Ilda Rui	1994	13	f	n	451	4
7649	Rita Luis	7994	13	f	n		7
7673	Jorge Jovito	1994	13	m	n		5
7701	Valdimiro Francisco	1994	13	m	n		6
7020	Joselda Antonio	1993-07-27	14	f	n	52	5
7023	Paulo A. Junior	1993-02-13	14	m	s	59	6
7138	Etelevina Jorge	1993	14	f	n		7
7161	Fernando Americo	1993	14	m	n	274	5
7176	Amigy Augusto	1993-05-31	14	m	n		4
7200	Felizarda Alfredo	1993*	14	f	n	75	6
7207	Catarina Joaquim	1993*	14	f	n		5
7265	Edimundo Eduardo	1993-06-25	14	m	n		6
7282	Vasco Antonio	1993*	14	m	n	334	4
7303	Amalia Anibal	1993	14	f	n	97	2
7364	Alcidio Antonio	1993	14	m	n		7
7454	Manuel Jorge	1993	14	m	n		6
7473	Lija Agostinho	1993	14	f	n		5
7611	Anastancio Felimone	1991	14	m	n		6
7639	Tereza Joaquim	1993	14	f	n		5
7727	Lurdes Antonio	1993	14	f	n		7
7007	Maria Armando	1992*	15	f	n	17	4
7013	Telma Afonso	1992*	15	f	s	31	0
7070	Mauricio Joker	1992	15	m	n	145	4
7072	Amancio Joao	1992	15	m	n		3
7074	Nilza Raquel	1992	15	f	n		7
7083	Balina Antonio	1992	15	f	n		6
7102	Leonel de Joao	1992-04-20	15	m	n		8
7174	Maria Venancio	1992	15	f	n		6
7214	Marta Antonio	1992	15	f	n		5
7217	Joaquim Bernardo	1992	15	m	n		3
7231	Inancia Alfeu	1992	15	f	s		4
7303	Otavio Anibal	1992	15	m	n		7
7315	Filipe Francisco	1992	15	m	n		6
7338	Etelevino Zidro	1992	15	m	n		6
7347	Juvencia Pascoal	1992	15	f	s	117	6
7349	Claudio Sergio	1992	15	m	n	441	4
7401	Castro Herculano	1992-02-19	15	m	n		6
7404	Catarina Cardigo	1992	15	f	n		5
7437	Valdimiro Galvao	1992-07-07	15	m	n		5
7459	Paulino Francisco	1992	15	m	n		9
7481	Fernando Pedro	1992	15	m	n		7
7627	Luisa Antonio	1992	15	f	n		4
7639	Benedita Pascoal	1992	15	f	n		8
7648	Leonilde Manuel	1992	15	m	n		6
7692	Albertina Jorge	1992	15	f	n		4
7006	Pedro Armando	1991*	16	m	n	11	6
7023	Helena Paul	1991-02-19	16	f	n	57	6
7059	Assucena Joaquim	1991-05-04	16	f	n		7
7102	Armandinho Joao	1991-08-05	16	m	n		6
7150	Rosita Joao	1991	16	f	n	251
7167	Ivone Fernando	1991	16	f	n	268	5
7170	Gloria Timoteo	1991	16	f	n		6
7173	Lutercia Americo	1991	16	f	n		5
7239	Esperanca Guilhermine	1991*	16	f	s		7
7281	Luisa Afonso	1991*	16	f	n		5
7313	Ivone Joao	1991	16	f	n		6
7313	Senilia Carlos	1991	16	f	n	429	4
7316	Erciodio Regina	1991	16	m	n		6
7353	Benedita Izidro	1991	16	f	n		6
7369	Aderco da Jozina	1991	16	m	n		4
7404	Melita Americo	1991	16	f	n		3
7412	Bernardo Jose	1991	16	m			4
7421	Pascoal Emidio	1991	16	m	n		6
7498	Otavio Rui	1991*	16	m	n		6
7672	Minalda Jovito	1991	16	f	n		7
7003	Celsia Afonso	1990-12-26	17	f	n	P005	6
7079	Juvencio Caetano	1990	17	m	n		5
7092	Lopes Joaquim	1990-03-02	17	m	n		7
7145	Marta Manuel	1990	17	f	n	243	5
7184	Telma Afonso	1990-10-04	17	f	n		5
7249	Arlindo Joao	1990*	17	m	n		4
7278	Rosa Antonio	1990	17	f	n		6
7327	Hortencia Jovito	1990	17	f	n		5
7347	Delcia Pascoal	1990	17	f	s	116	4
7428	Miguel Luis	1990-03-05	17	m	n		6
7432	Felizarda Humberto	1990-12-29	17	f	n		5
7455	Domingos Joege	1990	17	m	n		6
7461	Manuel F. Tinga	1990	17	m	n		8
7621	Maria Tereza Antonio	1990	17	f	n		9
7632	Caetano Manuel	1990	17	m	n		7
7670	Osvaldo Pedro	1990	17	m	n
7691	Ercilia Joao	1990	17	f	n		4
7727	Albertina Antonio	1990	17	f	n		5
7007	Virginia Pedro	1989*	18	f	n	16	4
7070	Joaquim Joker	1989	18	m	n		4
7112	Carmelina Chico	1989-12-30	18	f	n		5
7171	Marcelino Antonio	1989	18	m	n		5
7211	Claudencia Custodio	2/289	18	f	n	98	4
7255	Zulfa Afonso	1989-06-05	18	f	n		5
7256	Danubio Lucio	1989-03-29	18	m	n		6
7259	Ivo Jose	1989-06-10	18	m	n		7
7271	Juvencio Francosco	1989*	18	m	n		7
7278	Otinha Lino	1989	18	f	n		5
7303	Laura Anibal	1989	18	f	n		7
7313	Guilhermina Joao	1989	18	f	n		5
7335	Elidio Rofino	1989	18	m	n		5
7336	Lucrencia Zildo	1989	18	f	n		7
7350	Esmeraldo Sergio	1989	18	m	n		3
7370	Lucrencia Izidro	1989	18	f	n		6
7440	Pedro Augusto	1989	18	m	n		6
7468	Celso Ernesto	1989	18	m	n		6
7676	Angelo Juiso	1989	18	m	n		10
7705	Maria Felizberto	1989	18	f	n		4
7605-1	Palricio Reginaldo	1989*	18	m	n		5
7070	Acacio Sebastiao	1988	19	m	n		4
7080	Juvencio Caetano	1988-03-06	19	f	n		5
7101	Adercio Francelino	1988*	19	m	n		7
7108	Anastancia Artur	1988-10-12	19	f	n	304	5
7108	Nelson Gildo	1988*	19	m	n		1
7114	Nelson Afonso	1988*	19	m			5
7214	Crimilda Antonio	1988	19	f	n	171	6
7230	Tereza Armindo	1989	19	f	n		4
7254	Helena Antonio	1988-04-07	19	f	n		7
7255	Sara Maria	1988-07-14	19	f	n		7
7263	Inocencia Caetano	1988*	19	f	n		5
7266	Marcia Francisco	1988-04-05	19	f	n		6
7274	Fatima Boa Ventura	1988-12-27	19	f	n		8
7280	Cardelino Antonio	1988*	19	m	n
7284	Nelson Ernesto	1988	19	m	n		5
7343	Rita Jose	1988	19	f	s		8
7430	Alberto Pedro	1988	19	m	n		7
7485	Adelia Felimone	1988	19	f	n		5
7497	Crimildo Rui	1988*	19	m	n		6
7631	Afonso Manuel	1988	19	m	n		6
7692	Pedro Fernando	1988	19	m	n		4
7706	Isabel Joao	1988	19	f	n		4
7001	Joana Rafael	1987	20	f	s	P002	6
7023	Fidelcia Paulo	1987-06-15	20	f	n	56	5
7024	Clesio Paulo	1987-03-13	20	m	s	60	6
7059	Dulce Joaquim	1987-04-21	20	f	n		9
7071	Adercio Lazaro	1987-03-30	20	m	n		5
7107	Catarina Joao	1987*	20	f	n		6
7325	Amania Agostinho	1987	20	f	s		4
7345	Dulce Antonio	1987	20	f	n		5
7403	Olga Guimange	1987	20	f	n	201	6
7428	Paulino Luis	1987-12-12	20	m	n		9
7621	Nilza Antonio	1987	20	f	n		10
7685	Jose Eduardo	1987	20	m	n		6
7054	Ercilio Jose	1986	21	m	n	206	3
7070	Raquel Sebastiao	1986	21	f	n	144	5
7083	Maria Antonio	1986	21	f	n		5
7089	Assucena Gil	1986-08-23	21	f	n		6
7180	Renis Fernando	1986	21	m	n		7
7201	Esperanca Francisco	1986-03-16	21	f	n	80	7
7213	Eulalio Antonio	1986	21	m	n		4
7220	Selma Antonio	1986	21	f	s		6
7254	Atanasio Jovito	1986	21	m	n		7
7260	Esperanca Mateus	1986-02-18	21	f	n		4
7281	Jose Antonio Jose	1986*	21	m	n
7327	Tiburcio Paulo	1986	21	m	n		5
7342	Norma Natum	1986	21	f	n		4
7368	Osvaldo Antonio	1986	21	m	n		6
7370	Jubilio Felix	1986	21	m	n		5
7464	Albertina Felizberto	1986	21	f	n		5
7612	Lucrencia Jeremias	1986	21	f	n		6
7646	Argentina Jose	1986	21	f	n		4
7650	Renaldo Luis	1986	21	m	n		4
7674	Suzana Alberto	1986	21	f	n		5
7056	Silvio Joaquim	1985	22	m	n	210
7089	Nelson Joaquim	1985-09-15	22	m	n		5
7250	Julia Eduardo	1985*	22	f	n		5
7261	Juvencio Caetano	1985*	22	m	n		7
7328	Amelia Joao	1985	22	f	n		4
7413	Piedade Joao	1985	22	f	n		4
7452	Avelino Joao	1985	22	m	n		0
7630	Belarmina Manuel	1985	22	f	n		9
7695	Bevinda Antonio	1985	22	f	n		5
7695	Oliveira Francisco	1985	22	m	n		5
7480-2	Ana Armenia	1985	22	f	n		12
7004	Lucia Castogo	1984*	23	f	s	P010	4
7021	Nelson Manuel	1984-08-15	23	m	s	53	10
7173	Angelica Americo	1984	23	f	n		3
7266	Joao Joaquim	1984-01-27	23	m	n		5
7267	Disvaldina Antonio	1984*	23	f	n		5
7274	Luis Joaquim	1984*	23	m	n		7
7323	Mario Antonio	1984	23	m	n		4
7343	Francisco Antonio	1984	23	m	s		5
7376	Sonia Herculano	1984	23	f	n		6
7403	Alberto Pedro	1984	23	m	n		7
7485	Augusto Fortunato	1984	23	m	n		4
7540	Domingos Jorge	1984	23	m	n		6
7643	Jose Afonso	1984	23	m	n		5
7674	Eduardo Francisco	1984	23	m	n		6
7001	Lucio Afonso	1983-11-06	24	m	s	P001	7
7060	Esperanca Joaquim	1983-02-13	24	f	n		10
7063	Rita Armando	1983	24	f	n	215	2
7081	Amina Alberto	1983-07-06	24	f	n		11
7182	Judite Fortunato	1983	24	f	s		1
7210	Edna Francisco	1983-08-01	24	f	s	96	7
7220	Ernesto Fernando	1983	24	m	s		2
7309	Natalia Herinque	1983	24	f	n	118	5
7310	Sandra Alberto	1983	24	f	n	320	5
7329	Ana Jose	1983	24	f	n		4
7342	Valdimiro Antonio	1983	24	m	n		6
7010	Inocencia Alberto	1982-03-10	25	f	s	25	5
7016	Mauricio Bernardo	1982*	25	m	n		8
7062	Sandra Antonio	1982	25	f	n	212	4
7172	Lino Antonio	1982	25	m	n		4
7177	Amade Augusto	1982-06-09	25	m	n		5
7181	Barminio Candida	1982	25	m	n		4
7182	Gildo Fernando	1982	25	m	s		8
7206	Leonilda Afonso	1982*	25	f	n	162
7215	Mercia Rui	1982	25	f	n		1
7233	Gilberto Jose	1982	25	m	s		4
7261	Joaquina Azarias	1982*	25	f	n		4
7267	Luis Joaquim	1982*	25	m	n		7
7288	Elisa Francisco	1982*	25	f	n		5
7324	Victoria Fortunato	1982	25	f	n		5
7411	Maria Flora	1982	25	f	s		4
7411	Eulidio Fernando	1982	25	m	s		3
7424	Dercio Paulo	1982-10-17	25	m	s		6
7442	Domingos Joao	1982	25	m	n		5
7449	Maria Jorge	1982	25	f	n		5
7480	Nelson Pedro	1982	25	m	n		4
7645	Lucia Antonio	1992	25	f	n
7694	Josefa Jose	1982	25	f
7694	Jorge Francisco	1982	25	m
7004	Menaldo Afonso	1981-10-15	26	m	s	P009	6
7031	Crimilda Pedro	1981-01-06	26	f	s	70	5
7065	Benedita Sebastiao	1981-03-03	26	f	n	219	4
7081	Virgilio Antonio	22/5281	26	m	n		7
7201	Nelson Alfredo	1981*	26	m	s	79	6
7355	Julia Fernando	1981-08-25	26	f	n
7462	Armando Francisco	1981	26	m	n		7
7465	Joana Daniel	1981	26	f	n		5
7706	Rafael Felizberto	1981	26	m	n		5
7716	Celeste Leonardo	1981	26	f	n		6
7010	Antonio Pedro	1980-03-04	27	m	s	25	5
7018	Dias Canhiane	1980*	27	m	n		5
7026	Maria Celeste	1980-08-28	27	f	n	62	5
7083	Dionizia Antonio	1980	27	f	n	191	5
7146	Victoria Venancio	1980	27	f	n	261	2
7177	Milagrosa Maria	1980-03-01	27	f	n		7
7232	Milagrosa Jose	1980	27	f	n		3
7264	Ana Jorge	1980-02-12	27	f	n		5
7324	Sergio Francisco	1980	27	m	n		7
7341	Dulce Constantino	1980	27	f	s		5
7374	Dulce Gabriel	1980	27	f	s		4
7491	Rosa Victorino	1980	27	f	n		4
7697	Isabel Francisco	1980	27	f	s		6
7702	Olga Jorge	1980	27	f	n		4
7107	Jose Francelino	1979-12-30	28	m	n		5
7309	Smalgi Alberto	1979	28	m	n		6
7328	Jose Paulo	1979	28	m	n		5
7425	Tereza Joao	1979-09-09	28	f	n	506	3
7435	Josefa Julio	1979-12-15	28	f	n		5
7464	Ernesto Estevao	1979	28	m	n		4
7465	Ernesto Estevao	1979	28	m	n		4
7495	Josefa Pauluno	1979*	28	f	n		2
7661	Claudina Alexandre	1979	28	f	n		3
7663	Irene Armando	1979	28	f	n
7702	Ermenegildo Felizberto	1979	28	m	n		6
7015	Helder Manuel	1978*	29	m	n		6
7015	Francisco Jose	1978*	29	m	n		7
7190	Regina Rafael	1978	29	f	s
7197	Tina Joaquim	1978	29	f	n		5
7197	Eduardo Joaquim	1978	29	m	n		7
7230	Baptista Feliciano	1978	29	m	n		5
7250	Domingos Joao	1978*	29	m	n		5
7413	Juliao Joao	1978	29	m	n
7420	Nuro Abessoal	1978-11-30	29	m	n		10
7470	Dulce Pascoal	1978	29	f	n		4
7716	Felizberto Ricardo	1978	29	m	n		4
7012	Ana Francisco	1977*	30	f	s	29	5
7016	Joao Fabiao	1977*	30	m	n		8
7093	Maria Raimundo	1977-03-07	30	f	n		5
7139	Isabel Jeremias	1977	30	f	n		5
7140	Edna Francisco	1977	30	f	n	234	6
7204	Felex Francisco	1977*	30	m	n	88
7264	Augusto Joaquim	1977-08-10	30	m	n		7
7311	Felizarda Ricardo	1977	30	f	n	119	5
7325	Antonio Manuel	1977	30	m	s		4
7329	Antonio Paulo	1977	30	m	n		6
7376	Noemia Hercolano	1977	30	f	n		9
7380	Ivone Caetano	1905-05-30	30	f	s		6
7474	Manuel Antonio	1977	30	m	s		5
7486	Joaquina Fortunato	1970	30	f	n		6
7499	Maria Manuel	1977*	30	f	s
7600	Marta Manuel	1977*	30	f	n		4
7663	Jose Vasco	1977	30	m	n		5
7677	Lucia Paulo	1977	30	f	n		4
7008	Anselmo Pedro	1976-01-01	31	m	s	18	7
7019	Julio Simbine	1976*	31	m	n		4
7031	Adelto Ernesto	1976-06-06	31	m	n	69	8
7062	Osvaldo Armando	1976	31	m	n	211	4
7069	Luisa Sebastiao	1976	31	f	n		5
7218	Josina Alberto	1976	31	f	n		4
7227	Dulce Joaquim	1975	31	f	n		4
7270	Luisa Mario	1976*	31	f	n		4
7299	Laura Herinque	1976*	31	f	s		2
7301	Lucia Xavier	1976*	31	f	s		6
7304	Marcia Alberto	1976	31	f	s		5
7104	Hortencia Carlos	1975-03-15	32	f	n		5
7175	Cecilia Venancio	1975	32	f	n		3
7223	Claudia Fernando	1975	32	f
7331	Maria Jose Luis	1975	32	f	n		6
7425	Rodrigues Luis	1975-04-04	32	m	n	500	9
7471	Isabel Jose	1975	32	f	n		2
7474	Olga Rodrigues	1975	32	f	s		5
7480	Pedro Fernando	1975	32	m	n		4
7169	Ana Francisco	1974	33	f	n		2
7179	Esperanca Filipe	1974	33	f	s		5
7273	Feliz Rafael	1974-09-10	33	m	n		5
7299	Caetano Sebastiao	1974-07-11	33	m	s		2
7224	Fatima Armando	1973	34	f	s		4
7246	Laura Eugenio	1973*	34	f	s	309	5
7268	Judite Joaquim	1973-03-17	34	f	n		6
7619	Sara Alfredo	1973	34	f	n
7715	Josefa Mundo	1973	34	f	s		4
7014	Americo Fernando	1972-12-12	35	m	n		5
7018	Sebastiao Francisco	1972*	35	m	n		7
7051	Regina Afonso	1972	35	f	n	205	3
7093	Armando Botao	1972*	35	m	n	515	4
7115	Olga Menete	1972	35	f	n		2
7203	Abiguela Rafael	1972*	35	m	n	83	4
7273	Suzana Afonso	1972-07-14	35	f	n		4
7317	Rosa Rafael	1972	35	f	n		6
7363	Assia Zamudine	1972-01-08	35	f	n		8
7470	Sergio Fernando	1972	35	m	n		4
7492	Lucia Samuel	1972	35	f	n		4
7684	Eduardo Jose	1972	35	m	n		6
7008	Sandra Paulo	1971-02-16	36	f	s	19	5
7019	Raul Ernesto	1971*	36	m	s		7
7061	Antonio Paulino	1971*	36	m	n
7137	Albertina Fernando	1971	36	f	n		2
7158	Marta Francisco	1971	36	f	n	270	4
7218	Joaquim Antonio	1971	36	m	n		4
7226	Jose Joao	1971	36	m	n		4
7255	Faida Joao	1971-11-06	36	f	n		5
7302	Ines Herinque	1971	36	f		95	4
7302	Anibal Paulino	1971	36	m
7337	Luisa Gabriel	1971	36	f	s		5
7452	Isabel Filipe	1971	36	f	n		4
7651	Amelia Fortunato	1971	36	f	n		4
7715	Miguel Ricardo	1971	36	m	s		6
7066	Acacio Sebastiao	1970*	37	m	n	223	3
7067	Acacio Sebastiao	1970*	37	m	n		3
7109	Beatriz Afonso	1970*	37	f	n	189
7137	Silva Francisco	1970	37	m	n		3
7450	Lino Pedro	1970	37	m	n		7
7699	Luisa Bernardo	1970	37	f	n		4
7720	Julia Fernando	1970	37	f	n
7066	Maria Antonio	1969*	38	f	n	223	4
7105	Angelica Antonio	1969-12-12	38	f	n	211
7179	Carvalio Fernando	1969	38	m	s		4
7206	Filipe Wiliamo	1969*	38	m	n		4	9
7560	Marta Sebastiao	1969	38	f	n		3
7619	Carlos Armando	1969	38	m	n		4
7651	Joao Fernando	1969	38	m	n		5
7675	Paulo Manuel	1969	38	m	n		4
7017	Gito Armando	1968*	39	m	n		3
7029	Lino Texeira Botao	1968*	39	m	s	67	6
7144	Pacilina Paulo	1968	39	f	n	238	3
7173	Hawa Sagal	1968	39	f	n		6
7192	Laura Adriano	1968	39	f	n
7202	Albertina Siquisse	1968*	39	m	n	93	3
7279	Alzira Oliveira	1968*	39	f	n		2
7301	Pascoal Mabalane	1968*	39	m	s		5
7304	Carlos Ricardo	1968	39	m	s		4
7334	Xavier Nguila	1968	39	m	n		3
7363	Antonio Alberto	1968-12-02	39	m	n		9
7415	Suzete Elias	1968*	39	f	n	535	4
7423	Victoria Domingos	1968	39	f	n		3
7436	Ines Uassitela	1968	39	f	n	544	3
7472	Lucia Fernando	1968	39	f	n		5
7473	Laura Jose	1968	39	f	n		4
7489	Suzana Paulo	1968	39	f	n		4
7493	Maria Fernando	1968	39	f	n		4
7726	Tereza Venancio	1968	39	f	n		2
7097	Sandra Ernesto	1967-02-20	40	f	n		5
7109	Afonso Fernando	1967*	40	m	n		2
7115	Francisco Rafael	1967	40	m	n		5
7151	Isabel Armaldo	1967	40	f	n	253
7159	Bendito Francisco	1967	40	m	n	273	4
7173	Americo Francisco	1967	40	m	n		5
7237	Micaela Paulo	1967*	40	f	n		5
7337	Zildo Xavier	1967	40	m	s		6
7352	Izidro Xavier	1967	40	m	n		3
7671	Isabel Pedro	1967	40	f	n		4
7675	Teresa David	1967	40	f	n		3
7699	Francisco Felizberto	1967	40	m	n		2
7209	Joaquim Rafael	1966*	41	m	s	89	3
7366	Manuel Alberto	1966-06-02	41	m	n		9
7408	Joao Manuel	1959	41	m	n		0
7423	Emidio Felisberto	1966	41	m	n		4
7067	Balbina Francisco	1965*	42	f	n	224	4
7075	Lazaro Sebastiao	1965-09-25	42	m	n		4
7116	Gildo Rafael	1965	42	m	n		4
7166	Fernando Paulo	1965	42	m	n	269	6
7255	Lucio Alberante	1965-12-07	42	m	n		7
7435	Galvao Armando	1965-07-04	42	m	n		3
7436	Galvao Armando	1965-07-04	42	m	n		5
7456	Jorge Manuel	1958	42	m	n		2
7469	Rafaela Ricardo	1965	42	f	n		3
7614	Maria Jorge	1965	42	f	n		4
7661	Ernesto Jose	1965	42	m	n		2
7246	Miguel Jose	1964*	43	m	n		6
7344	Amelia Ricardo	1964	43	f	n		1
7418	Jose Bonito	1964-04-06	43	m	n		10
7457	Guilherme Manuel	1954	43	m	n		1
7458	Marcelina Domingos	1954	43	f	s		4
7469	Luis Fernando	1964	43	m	n		4
7614	Armando Luciano	1964	43	m	n		4
7621	Joana Temoteo	1964	43	f	n
7628	Candida Alberto	1964	43	f	n		5
7707	Delefina Manuel	1964	43	f	n		2
7720	Manuel Fernando	1964	43	m	n
7100	Marta da Gloria	1963*	44	m	n		3
7189	Luisa Armando	1963*	44	f	n		4
7240	Esperanca Joao	1963*	44	f	s		3
7354	Marta Lucas	1963	44	f	n		3
7456	Herminia Domingos	1956	44	f	n	110	3
7626	Rosalina Francisco	1963	44	f	n		4
7688	Antonio Joao Ngoka	1963	44	m	s		10
7690	Raquel Fortunato	1963	44	f	n
7726	Antonio Joaquim	1963	44	m	n		7
7252	Maria Pedro	1962*	45	f	n		3
7258	Jose Botao	1962-10-12	45	m	n		3
7314	Regina Antonio	1962	45	f	n		3
7378	Germana Abrantes	1962	45	m	n	89	3
7684	Isabel Augostinho	1962	45	f	n
7139	Joao Rafael	1961	46	m	n		4
7234	Maria Saete	1961	46	f	n	207	4
7405	Ermelinda Pedro	1961	46	f	n		0
7690	Francisco Pedro	1961	46	m	n		7
7002	Joana Caetano	1960-02-08	47	f	s	P006	3
7022	Paulo Alfeu Botao	1960-11-25	47	m	s	54	5
7141	Joaquina Rafael	1960	47	f	n	242
7151	Armando Manuel	1960	47	m	n	254	4
7458	Francisco Tinga	1953	47	m	s	203	4
7642	Maria Pedro	1960	47	f	n		1
7022	Leonora Valentim	1959*	48	f	s	55	5
7053	Angelica Luis	1959	48	f	n		4
7187	Lidia Francisco	1959-08-05	48	f	n	530
7231	Pascoa Antonio	1969	48	f	s		4
7238	Marta Manuel	1959*	48	f	n
7312	Olga Ricardo	1959	48	f	n		2
7348	Rosalina Thonela	1969	48	f	s		5
7348	Sergio Xavier	1969	48	m	s		4
7352	Marta Francisco	1969	48	f	n		5
7363	Ana Rafael	1959	48	f	n
7457	Luisa Nguiliche	1959	48	f	n		2
7610	Tereza Augustolinho	1959	48	f	n		5
7142	Angelica Francisco	1958	49	f	n	240
7143	Amelia Armando	1958	49	f	s	235	2
7183	Rosa Alberto	1958-08-12	49	f	n	107
7200	Isabel Antonio	1958*	49	f	n	74	3
7252	Jovito Armando	1958*	49	m	n		4
7257	Lucia Armando	1958*	49	f	n
7493	Rui Avelino	1958	49	m	n		3
7629	Ana Fernando	1958	49	f	n
7676	Angelo Armando	1958	49	m	n		12
7005	Sara Samo	1957*	50	f	n	P012
7064	Adelaide Manuel	1957	50	f	n	217
7144	Manuel Rafael	1957	50	m	n	237	3
7183	Afonso Joaquim	1957-06-16	50	m	n	101	5
7212	Amelia Fernando	1957	50	f	n		4
7427	Felizarda Joaquim	1957*	50	f	n	518	2
7610	Filimone Foquisso	1957	50	m	n
7626	Antonio Manuel	1957	50	m	n		1
7640	Delefina Filipe	1957	50	f	n
7677	Manuel Joao	1957	50	m	n		2
7057	Delefina Joao	1956	51	f	n		2
7140	Teofelo Domingos	1956-07-16	51	m	s	230	5
7142	Salvador Mateus	1956	51	m	n	241	4
7174	Isabel Paulo	1956	51	f	n
7176	Laura Fernando	1956	51	f	n
7240	Guilhermina Jorge	1956*	51	m	s		4
7321	Albertina Jose	1956	51	f	n		2
7480	Assucena Antonio	1956	51	f	n		4
7638	Joaquina Joao	1956	51	f	n		3
7314-1	Marta Alberto	1956	51	f	n		1
7005	Pedro Jose	1955*	52	m	n	13
7085	Helena Domingos	1955	52	f	n
7086	Melita Pascoal	1955	52	f	n
7238	Roque Alberto	1955*	52	m	n
7317	Jose Jacinto	1975	52	m	n		6
7638	Joaquim Fernando	1955	52	m	n		2
7140	Deolinda Rafael	1954*	53	f	s	231
7408	Luisa Manuel	1954	53	f	n		0
7492	Luis Miguel	1954	53	m	n		4
7722	Madalena Abrante	1954	53	f	n		3
7028	Maria Jorge	1953*	54	f	s	65	2
7148	Julia Augusto	1953	54	f	n	264	4
7190	Antonio Jose Antonio	1953*	54	m	s		4
7494	Florentina Ricardo	1953	54	f	n
7605-1	Leonor Franse	1953*	54	f	s		4
7017	Armando Welemo	1952*	55	m	n		0
7200	Alfredo Jorge	1952*	55	m	n	73	3
7229	Gloria Wandene	1952	55	f	n		1
7258	Victoria Mateus	1952*	55	f	n	306	1
7270	Joao Francisco	1952-02-12	55	m	n
7629	Ernesto Antonio	1952	55	m	n
7330	Jaime Armando	1951	56	m	n
7057	Joaquim Maleuga	1950	57	m	n		4
7091	Amelia Maleuga	1950	57	f	n
7147	Rosa Joaquim	1950	57	f	n	248
7416	Ana Ngure	1950*	57	f	n	528	2
7452	Luis Domingos	1950	57	m	n		7
7473	Agostinho Saete	1950	57	m	n
7625	Maria Alberto	1950	57	f	n
7314-1	Jacinto Fernando	1950	57	m	n		3
7225	Isabel Mateus	1949	58	f	s	209	2
7012	Lucio Alves	1948*	59	m	s	28	4
7020	Joana Manuel	1948*	59	f	n	51
7103	Delefina Fernando	1948-10-06	59	f	n	210
7143	Luis Rafael	1948	59	m	s	236
7467	Marta Arnaldo	1949	59	f	n		2
7482	Augusta Manuel	1948	59	f	n		3
7219	Domingas Laice	1940	60	f	n
7221	Guilhermina Botao	1940	60	f	n
7312	Joao Nguila	1947	60	m	n		3
7365	Carlota Rungo	1947	60	f	n		4
7375	Felizarda Ofisso	1947-10-05	60	f	n	106
7408	Joao Elias	1947	60	m	n		3
7602	Elisa Timanhana	1947	60	f	n
7407	Josefa Joao	1946	61	f	n		0
7409	Albertina Matavata	1946	61	f	n		3
7410	Carlota Paulino	1946	61	f	n		1
7429	Carolina Siquisse	1946	61	f	n		2
7467	Ernesto Antonio	1946	61	m	n		4
7483	Albertina Manuel	1946	61	f	n
7055	Tereza Manuel	1945	62	f	n	207	0
7095	Laura Bata	1945	62	f	n
7251	Julia Fernando	1945	62	f	n
7375	Herculano Antonio	1945	62	m	n		1
7640	Luis Rafael	1945	62	m	n
7642	Luis Rafael	1945	62	m	n
7100	Atanasio Maringue	1944-04-26	63	f	n
7118	Julia Manuel	1944*	63	f	n		2
7147	Venancio Joaquim	1944	63	m	n	247	4
7148	Venancio Joaquim	1944	63	m	n
7439	Luisa Lucas	1944	63	f	n	504
7645	Palmira Tchalo	1944	63	f	n		2
7055	Afonso Botao	1943	64	m	n		2
7073	Joana Nhareluga	1943-05-13	64	f	n	120	1
7087	Esperanca Ernesto	1943	64	f	n
7219	Fernando Jossai	1943	64	m	n
7351	Helena Nguila	1943	64	f	n
7154	Wogoma Mbicane	1942	65	f	n	260
7409	Ricardo Elias	1942	65	m	n
7153	Joaquina Joao	1941	66	f	n	265	2
7285	Marta Manuel	1941	66	f	n		4
7688	Chananguane	1941	66	f	n
7410	Feleciano Antonio	1940	67	m	n		4
7613	Albertina Pauluno	1939	67	f	n
7617	Fernando Nguila	1940	67	m	n		3
7687	Tereza Manuel	1940	67	f	n
7689	Raci Siquisse	1940	67	f	n
7719	Josefa Joaquim	1940	67	f	n
7064	Francisco Bato	1939-10-29	68	m	n	216	3
7106	Tereza Jose	1939	68	f	n
7119	Isabel Bernardo	1939	68	f	n		3
7165	Resilia Mbata	1939	68	f	n	266
7178	Madalena Bernardo	1939	68	f	n
7283	Raquel Antonio	1939	68	f	n
7086	Joaquim Maleuga	1938	69	m	n		3
7087	Joaquim Maleuga	1938	69	m	n		3
7373	Luisa Jose	1938	69	f
7429	Luis Manguaula	1938	69	m	n		4
7602	Manuel Sarmento	1938	69	m	n		3
7229	Sebastiao Magavas	1937	70	m	n		3
7379	Josefa Muando	1937	70	f	n
7404	Tereza Alberto	1937	70	f	n		2
7406	Ermelinda Antonio	1937	70	f	n	122	0
7490	Maria Mareledze	1937	70	f	n
7077	Caetano Carlos	1936	71	m	n		4
7084	Caetano Carlos	1936	71	m	n		4
7096	Tereza Nguila	1936*	71	f	n	227
7113	Madalena Rafael	1936	71	m	n		3
7288	Luis Lucas	1936*	71	m	n		4
7300	Luisa Magumba	1936*	71	f	s	156
7407	Fernando Cuamba	1936	71	m	n		3
7441	Eva Naene	1936	71	f	n
7484	Isabel Rungo	1936	71	f	s
7489	Ricardo Jose	1936	71	m	n		1
7300	Paulino Banguela	1935*	72	m	s	188
7330	Joana David	1935	72	f	n
7487	Ugoma Alberto	1935	72	f	n
7601	Beatriz Sarmento	1935	72	f	n		1
7625	Pedro Duzento	1935	72	m	n
7704	Cristina Nhanala	1935	72	f	n		1
7722	Isabel Francisco	1935	72	f	n
7621--1	Maria Joao	1935	72	f	n
7025	Albertina Joao	1934-03-15	73	f	n	61	0
7084	Isabel Pedro	1934-09-02	73	f	n		3
7136	Isabel Pedro	1934-02-09	73	f	n		4
7165	Paulo Rungo	1934	73	m	n	267
7168	Luisa Mendes	1934	73	f	n
7212	Antonio Matavata	1934	73	m	n
7050	Josefa Pedro	1932*	75	f	s	201	1
7085	Afonso Phalegue	1932	75	m	n
7111	Joaquim Sumburane	1932	75	m	n
7223	Andre Santos	1932	75	m	s
7243	Catarina Nguila	1932	75	f	n	185	2
7427	Luis Manguaula	1932*	75	m	n		2
7439	Carlos Botao	1932	75	m	n	505	3
7500	Viriato Texeira	1932*	75	m	n		2
7605	Fortunato Joao	1932*	75	m	s		1??
7622	Xavier Antonio	1932	75	m	n		6
7623	Julieta Tinga	1932	75	f	n
7709	Ndite	1932	75	f	n
7050	Afonso Botao	1931*	76	m	s	200	2
7125	Amelia Bambo	1931-02-16	76	f	n		4
7707	Felizberto Fernando	1931	76	m	n
7709	Albino Paulo	1931	76	m	n
7621--1	Antonio de Castro	1931	76	m	n		2
7088	Marta Paulino	1930	77	f	n
7096	Luis Mateus	1930*	77	m	n	226
7122	Helena Naene	1930	77	f	n		1
7178	Fernando Manuel	1930	77	m	n		4
7645	Armando Francisco	1930	77	m	n
7679	Bernardo Jossai	1930	77	m	n
7152	Mussa Mamudo	1929	78	m	n	258
7693	Pedro Manguaula	1929	78	m	s		3
7719	Mariamo Ibraimo	1929	78	f	n
7188	Francisco Ofisso	1928-06-01	79	m	n		3
7094	Wugui Naene	1927-03-16	80	f	n
7287	Raimunda Lucas	1924	83	f	n
7379	Caetano Massirela	1923-01-23	84	m	n		3
7106	Miguel Manguaula	1922	85	m	n		4
7603	Joaquina Jonasse	1922	85	f	n		3
7624	Alfredo Madija	1922	85	m	n		2
7160	Joaquina Jonasse	1921	86	f	n	271
7020	Alfeu Botao	1920*	87	m	n	50	2
7155	Marta Antonio	1920	87	f	n	259
7326	Luisa Mbata	1920	87	f	n
7604	Armando Mayendela	1920*	87	m	n
7077	Elisa Joao		!!!	f	n
7146	Alex Antonio	2007	?m	m	n	263
7151	Helio Arnaldo	2007	?m	m	n	257
7560	Minerva da Marta	2007	?m	f	n
7705	Minercia Sergio	2006	?m	f	n
7706	Sinoisa rafael	2007	?m	f	n
7190	Lucia Antonio		*+11	f	n		4
7191	Ernesto Antonio		*+15	m	n		3
7191	Dercio Antonio		*+18	m	n
7375	Muler Arlindo		*+3	m	n	107
7209	Julia Filipe		*+30	f	s	90	5
7189	Caetano Joaquim		*+40	m	n		4
7186	Maria Pascoal		*+50	f	n	529
7186	Pascoal Ofisso		*+60	m	n		2
7205	Maria Wiliamo		*+60	f	n	85
7367	Isabel Mbata		*+60	f	n
7400	Hortencia Joao		*2	f	n		!
7082	Nilza Pedro		*20	f	n	187	8
7082	Acacio Antonio		*20	m	n		5
7402	Sonia Paulo		*20	f	n		7
7402	Eugenio Herculano		*30	m	n		5
7400	Luisa Alberto		*51	f	n		2
7400	Heculano Antonio		*60	m	n		0
7246	Miguel Miguel	2006-05-21	1,1m	m	s	313
7177	Sumaile Amade	2006-05-03	1,2m	m	n
7245	Mario Miguel	1996-12-07	10,6m	m	n		4
7080	Neima Pedro	2006-09-24	10m	f	n
7201	Jorge Nelson	2006-08-12	10m	m	n	82
7197	Nelson Eduardo	2006-08-23	11m	m	n
7245	Fernando Miguel	1994-11-15	12,7m	m	n	315	3
7247	Rodrigues Miguel	1992-09-12	12,8m	m	n		6
7244	Maria Eduardo	1992-10-19	14,8m	f	n	314	7
7205	Manuel Nelson	2004-12-11	2,6m	m	n	86
7206	Gercio Filipe	2004-12-04	2,6m	m	n	163
7246	Erminio Miguel	2004-12-12	2,6m	m	n	312
7107	Marta Jose	2004-10-16	2,8m	f	n
7250	Raufo Domingos	2004-08-17	2,8m	m	n
7248	Alfeu Joao	1984-12-25	22,6m	m	n		5
7008	Sonia Anselmo	2007-01-13	25 dias	f	s	22
7210	Gervasio Manuel	2003-08-22	3,10m	m	n	97
7246	Amelia Miguel	1999-04-27	3,2m	f	n	310	3
7031	Elsa Adelto	2006-11-19	3m	f	s	72	0
7250	Anucha Domingos	2002-04-21	4,2m	f	n
7197	Esperanca Eduardo	2002-10-31	4,8m	f	n
7202	Salvador Armando	2002-09-27	4,9m	m	n	95
7246	Jose Miguel	2001-05-22	5,1m	m	n	311
7269	Cubanito Juliao	2000-12-04	6,6m	m	n		1
7002	Alexandra Afonso	2007-02-03	6dias	f	s	P008	0
7108	Silvia Nelson	2007-01-07	6m	f	n	305
7173	Arsenio Americo	2006	6m	m	n
7694	Raquel Jorge	2006	6m	f
7697	Rosa Pedro	2006	6m	f	s
7250	Cartilio Domingos	2006-11-04	7m	m	n
7267	Dalva Luis	2006-11-04	7m	f	n
7425	Djone Rodrigues	2006-10-08	8m	m	n	507
7028	Pedro Jose			m	s	64
7029	Lucia Jorge			f	s	68	0
7090	Claudina Maleuga			f	n	531
7118	Fernando Botao			m	n		3
7192	Tiago Jose			m	n		7
7334	Palmira Jaime	*		f	n		3

## Sheet: Animais
Casa	Nenhuma	Cao	Porco	Boi	Gato	Pato	Cabrito	galinha	Peru	Outros
7400		0	0	0	0	13	0	4	0	0
7404		0	1	0	0	0	0	1	0	0
7405		0	1	0	0	10	0	2	0	0
7406		0	0	0	0	1	0	18	0	0
7407		0	2	0	0	0	3	5	0	0
7408		0	0	0	0	3	0	6	0	0
7456		0	0	0	0	14	0	7	0	0
7457		0	0	0	0	5	0	1	0	0
7458		0	0	0	0	5	3	0	0	0
7462		0	0	0	0	3	0	4	0	0
7002		0	0	0	0	0	0	7	0	0
7004		0	0	0	0	0	0	22	0	0
7005		1	1	0	0	33	3	0	0	0
7008		1	0	0	0	0	0	*18	0	0
7010		0	0	0	0	23	0	0	0	0
7012		3	0	0	0	0	0	7	0	0
7020		0	4	0	0	0	0	26	0	0
7022		1	2	0	0	0	0	12	0	0
7028		0	0	0	0	9	2	1	0	0
7029		0	1	0	0	0	2	7	0	0
7050		0	2	0	0	0	3	3	0	0
7055		0	0	0	0	0	0	4	0	0
7062		0	1	0	0	0	0	6	0	0
7064		0	0	0	0	2	0	3	0	0
7065		0	0	0	0	0	0	2	0	0
7067		0	0	0	0	0	0	2	0	0
7066		0	0	0	0	0	0	5	0	0
7069		0	0	0	0	0	5	2	0	0
7070		0	0	0	0	0	0	2	0	0
7119		0	0	0	1	0	0	4	0	0
7621--1		0	5	0	0	0	4	5	0	0
7621		0	5	0	0	0	4	5	0	0
7625		0	0	0	0	0	3	0	0	0
7675		0	1	0	0	0	0	0	0	0
7638		0	0	0	0	7	1	10	0	0
7474		0	0	0	0	8	0	9	0	0
7473		0	1	0	0	3	0	6	0	0
7471		0	0	0	0	2	0	0	0	0
7470		0	1	0	0	5	0	6	0	0
7630		0	0	0	0	0	0	2	0	0
7629		0	1	0	0	0	0	17	0	0
7628		0	1	0	0	0	0	10	0	0
7626		0	2	0	0	2	0	5	0	0
7411		0	1	0	0	0	0	4	0	0
7431		0	1	0	0	0	2	3	0	0
7106		0	0	0	0	5	0	0	0	0
7677		0	0	0	0	4	0	3	0	0
7409		0	0	0	0	0	0	1	0	0
7287		0	0	0	4	0	0	0	0	0
7285		0	0	0	0	3	0	8	0	0
7485		0	1	0	0	0	1	0	0	0
7611		0	0	0	0	1	0	0	0	0
7484		0	1	0	0	0	0	4	0	0
7480--1		0	3	0	0	12	0	30	0	0
7482		0	0	0	0	0	0	2	0	0
7614		0	3	0	0	0	0	5	0	0
7429		1	1	0	1	0	3	4	0	0
7122		0	1	0	0	0	0	0	0	0
7430		1	1	0	1	0	3	4	0	0
7423		0	3	0	0	4	1	5	0	0
7115		0	1	0	3	0	0	0	0	0
7490		0	1	0	0	3	0	5	0	0
7489		0	1	0	0	0	0	7	0	0
7469		0	2	0	0	12	0	16	0	0
7467		0	1	0	0	0	0	0	0	0
7465		0	0	0	0	16	0	2	0	0
7363		0	0	0	0	0	0	10	0	0
7441		0	0	0	0	0	1	10	0	0
7440		0	2	0	0	0	0	0	0	0
7439		0	3	0	0	0	4	8	0	0
7435		0	4	0	0	0	0	6	0	0
7428		1	0	0	0	0	2	4	0	0
7427		1	2	0	1	0	4	12	0	0
7426		0	0	0	1	0	1	1	0	0
7605--1		0	1	0	0	4	0	5	0	0
7602		0	0	0	0	5	1	0	0	0
7413		0	1	0	0	0	0	0	0	0
7410		0	0	0	0	2	2	0	0	0
7425		1	1	0	1	0	5	5	0	0
7424		0	0	0	0	0	1	3	0	0
7416		0	1	0	0	0	2	3	0	0
7499		0	1	0	0	0	0	10	0	0
7493		0	1	0	0	0	0	10	0	0
7492		0	1	0	0	1	0	5	0	0
7436		0	4	0	0	0	0	6	0	0
7253		0	0	0	0	7	0	6	0	0
7252		0	0	0	0	7	0	8	0	0
7282		0	0	0	0	1	0	0	0	0
7112		0	0	0	0	0	2	5	1	0
7265		0	2	0	0	0	0	12	0	0
7266		0	1	0	0	3	0	3	0	0
7268		0	2	0	0	0	0	5	0	0
7269		0	2	0	0	0	0	3	0	0
7288		0	2	0	0	4	0	0	0	0
7280		0	2	0	0	9	0	0	0	0
7084		1	1	0	1	6	3	12	0	0
7053		0	0	0	0	3	0	2	0	0
7254		0	0	0	0	5	0	5	0	0
7057		1	0	0	0	0	5	8	0	0
7059		0	0	0	0	0	0	6	0	0
7200		0	1	0	1	3	1	4	0	0
7201		0	0	0	0	0	0	3	0	0
7202		0	0	0	1	0	5	3	0	0
7203		0	2	0	0	6	0	1	0	0
7205		0	0	0	0	0	0	10	0	0
7206		0	4	0	0	0	2	23	0	0
7209		0	0	0	0	10	0	10	0	0
7212		0	0	0	0	4	0	2	0	0
7218		0	1	0	0	0	0	2	0	0
7219		0	1	0	0	0	3	2	0	0
7221		0	1	0	0	0	0	4	0	0
7223		0	1	0	0	0	3	4	0	0
7224		0	0	0	2	0	2	3	0	0
7225		0	1	0	0	0	8	7	0	0
7227		0	1	0	0	0	0	0	0	0
7229		0	0	0	0	7	3	21	0	0
7230		0	0	0	0	1	0	1	0	0
7234		0	0	0	0	0	1	2	0	0
7243		0	1	0	0	1	1	0	0	0
7246		0	0	0	0	4	1	11	0	0
7248		0	0	0	0	0	4	0	0	0
7250		0	0	0	0	0	0	3	0	0
7281		0	1	0	0	5	0	0	0	0
7274		0	1	0	0	7	0	2	0	0
7273		0	2	0	0	4	3	8	0	0
7270		0	2	0	0	8	0	1	0	0
7267		1	1	0	0	2	0	10	0	0
7264		1	2	0	0	7	4	12	0	0
7240		0	3	0	0	2	6	8	0	0
7238		0	0	0	0	2	0	5	0	0
7237		0	1	0	0	0	0	5	0	0
7231		0	0	0	0	3	0	1	0	0
7255		0	0	0	1	20	0	20	0	0
7256		0	0	0	0	0	0	7	0	0
7258		0	2	0	0	0	0	6	0	0
7299		0	1	0	0	10	0	5	0	0
7100		0	0	0	0	0	1	4	0	0
7101		0	0	0	0	0	0	1	0	0
7102		0	0	0	0	0	1	0	0	0
7103		0	0	0	0	2	0	2	0	0
7104		0	0	0	0	0	6	6	0	0
7105		0	0	0	0	4	0	3	0	0
7108		0	1	0	1	0	0	2	0	0
7109		0	1	0	1	0	3	6	0	0
7110		0	0	0	0	0	0	2	0	0
7111		0	0	0	0	0	1	2	1	0
7113		0	0	0	0	0	2	5	1	0
7137		1	1	0	3	4	2	2	0	0
7140		0	0	0	0	35	7	15	0	0
7141		0	1	0	0	0	0	0	0	0
7142		0	1	0	0	0	0	9	0	0
7143		0	3	0	0	11	0	3	0	0
7144		0	0	0	0	0	0	3	0	0
7147		0	1	0	0	0	5	15	0	0
7148		0	0	0	0	0	0	10	0	0
7153		0	0	0	0	0	3	5	0	0
7158		0	0	0	4	7	0	8	0	0
7165		0	0	0	0	0	2	7	0	0
7176		0	1	0	0	4	0	4	0	0
7183		0	1	0	0	0	1	2	0	0
7186		0	0	0	1	0	2	6	0	0
7189		0	2	0	0	0	0	0	0	0
7197		0	0	0	0	0	0	12	0	0
7118		1	1	0	0	0	1	2	0	0
7113		1	0	0	1	0	6	3	0	0
7300		0	0	0	0	0	0	10	0	0
7301		0	0	0	0	0	3	12	0	0
7303		0	3	0	0	0	0	10	0	0
7304		0	1	0	0	0	3	14	0	0
7308		0	0	0	0	15	1	0	0	0
7312		0	0	0	0	0	0	3	0	0
7317		0	3	0	0	3	0	8	0	0
7325		0	0	0	0	3	0	0	0	0
7325		0	0	0	0	3	0	0	0	0
7342		0	0	0	0	3	2	2	0	0
7343		0	1	0	0	10	0	5	0	0
7344		0	0	0	0	7	7	3	0	0
7348		0	1	0	0	3	0	4	0	0
7349		0	0	0	0	2	0	2	0	0
7352		0	0	0	0	2	0	2	0	0
7355		0	0	0	0	1	0	0	0	0
7363		0	0	0	0	5	0	7	0	0
7373		0	0	0	0	0	0	2	0	0
7374		0	2	0	0	0	0	0	0	0
7375		0	2	0	1	4	0	2	0	0
7378		0	0	0	0	0	0	2	0	0
7379		0	1	0	0	0	0	4	0	0
7263		0	0	0	0	2	0	0	0	0
7192		0	1	0	0	0	0	0	0	0
7278		0	1	0	0	0	0	0	0	0
7560		0	0	0	0	0	0	2	0	0
7125		0	1	0	0	0	0	0	0	0
7661		0	1	0	0	2	0	4	0	0
7095		0	0	0	0	2	0	4	0	0
7139		0	1	0	1	4	0	5	0	0
7198		0	1	0	0	3	2	0	0	0
7137		0	0	0	1	2	0	5	0	0
7138		0	1	0	1	0	2	4	0	0
7662		0	1	0	0	0	0	0	0	0
7663		0	1	0	0	7	0	8	0	0
7640		0	1	0	0	1	0	0	0	0
7690		0	1	0	0	6	7	9	0	0
7695		0	1	0	0	0	2	0	0	0
7641		0	0	0	0	1	0	0	0	0
7649		0	0	0	2	0	0	0	0	0
7642		0	1	0	0	0	0	5	0	0
7182		0	1	0	0	2	2	6	0	0
7181		1	0	2	0	0	0	0	0	0
7071		0	0	0	0	0	4	12	0	0
7072		0	0	0	0	0	4	12	0	0
7073		0	0	0	0	0	2	2	0	0
7074		0	0	0	0	0	4	12	0	0
7075		0	0	0	0	0	0	2	0	0
7077		0	0	0	0	0	0	3	0	0
7080		0	0	0	0	0	0	1	0	0
7082		0	0	0	0	0	0	2	0	0
7085		0	0	0	0	0	0	1	0	0
7086		2	1	0	0	2	7	3	0	0
7087		2	1	0	0	2	7	3	0	0
7089		1	0	0	0	0	0	12	0	0
7090		0	0	0	0	0	0	2	0	0
7093		1	1	0	0	6	5	0	0	0
7096		0	0	0	0	3	0	4	0	0
7097		0	0	0	0	2	0	5	0	0
7415		0	1	0	0	0	1	0	0	0
7174		0	0	0	0	0	0	7	0	0
7331		0	1	0	0	0	0	4	0	0
7726		0	1	0	0	5	0	3	0	0
7328		0	0	0	0	0	0	3	0	0
7321		0	0	0	0	2	3	10	0	0
7684		0	1	0	0	0	0	8	0	0
7704		0	0	0	1	8	4	15	0	0
7715		0	1	0	0	0	6	13	0	0
7178		1	0	4	4	0	2	20	0	0
7169		0	0	0	2	3	1	0	0	0
7116		0	0	0	0	0	0	7	0	0
7284		0	0	0	0	0	2	0	0	0
7283		0	0	0	1	0	0	0	0	0
7251		0	0	0	0	2	0	0	0	0
7722		0	1	0	0	18	6	7	0	0
7716		0	1	0	0	2	0	2	0	0
7709		0	0	0	0	3	3	7	0	0
7702		0	0	0	1	0	2	9	0	0
7721		0	0	0	0	0	4	0	0	0
7708		0	0	0	0	0	2	0	0	0
7707		0	2	0	1	18	0	13	0	0
7453		0	0	0	1	2	0	3	0	0
7442		0	1	0	0	3	0	2	0	0
7452		0	1	0	0	7	0	4	0	0
7450		0	1	0	0	0	2	4	0	0
7449		0	0	0	0	2	0	4	0	0
7689		0	1	0	1	0	2	4	0	0
7688		0	2	0	1	6	0	9	0	0
7687		0	1	0	1	0	0	0	0	0
7722		0	1	0	0	0	1	9	0	0
7694		0	1	0	0	1	0	10	0	0
7173		0	0	0	0	12	0	9	0	0
7699		0	1	0	0	0	0	0	0	0
7706		0	0	0	0	0	0	6	0	0
7651		0	2	0	0	0	2	10	0	0
7314--2		0	5	0	0	3	0	4	0	0
7314--1		0	0	0	0	0	1	0	0	0
7692		0	0	0	0	0	0	3	0	0
7646		0	0	0	0	6	0	5	0	0
7720		0	0	0	0	3	0	7	0	0
7645		0	0	0	5	0	0	2	0	0
7691		0	0	0	0	2	2	5	0	0
7327		0	1	0	0	2	0	0	0	0
7336		0	0	0	0	0	0	3	0	0
7337		0	5	0	0	0	0	5	0	0
7329		0	1	0	0	5	0	0	0	0
7324		0	1	0	0	1	0	1	0	0
7330		0	1	0	0	0	0	0	0	0

## Sheet: Casas
# Casa	Data	Entrevistador	Dono de casa	Tempo aqui	Pessoas	Nome de fora	Mortos	Potavel	Lavar	animais	quartos	camas	Telhado	aberturas	Porto	Paredes	Cumprimento	Largura	Onde vai pra tratar malaria	C. cozinha	radio	celular	bicicleta	solar	barco	Gps	observacoes
7001	2007-02-08	Marden Pereira	Lucio Afonso	5 anos	3	0	0	em casa	em casa	0	1	1	canico	1,5	4	canico	550	300	posto de s. magumbo	1	2	1	2	2	0	S23*44`186" E035*24`070"
7002	2007-02-08	Lourenco Felimone	Joana Caetano	28 anos	3	0	0	poco	poco	sim	1	2	3	1	4	canico	700	3,20	posto de s. magumbo	1	2	2	2	2	0	S23*44`191" E035*24`047"
7003	2007-02-08	Elsa V.Ernesto	Juvencia Afonso	13	2	0	0	poco caseira	em casa	0	1	1	2	18	4	2	500	320	posto de s. magumbo	1	2	2	2	2	0	S23*44`192" E035*24`042"
7004	2007-02-08	Marden Pereira	Menaldo Afonso	5	2	0	sim	no vizinho	no vizinho	sim	1	1	3	5	4	canico	700	320	posto de s. magumbo	1	1	1	2	2	1	S23*44`219" E035*24`030"	existem outros animais que picam: sim e o supervejo.
7005	2007-02-08	Lourenco Felimone	Sara Samo	27	4	0	0	poco	poco	sim	2	2	2	3	3	canico	600	350	posto de s. magumbo	1	1	2	2	2	1	S23*44`112" E035*24`037"
7006	2007-02-08	Marden Pereira	Pedro Armando	26	1	0	0	no vizinho	no vizinho	0	1	1	2	7	3	2	350	200	posto de s. magumbo	1	2	2	2	2	0	S23*44`177" E035*24`079"
7007	2007-02-08	Marden Pereira	Virginia Pedro	18	2	0	0	no vizinho	no vizinho	0	2	2	2	13	3	canico	300	246	posto de s. magumbo	1	2	2	2	2	0	S23*44`105" E035*24`082"	existem outros animais que picam: sim e o supervejo. 56cm encima da porta de abertura.
7008	2007-02-09	Elsa V.Ernesto	Anselmo Pedro	2	4	0	0	no vizinho	em casa	sim	1	2	3	0	4	canico	700	350	posto de s. magumbo	1	1	1	2	2(tem girador	0
7009	2007-02-09	Elsa V.Ernesto	Gercia Anselmo	2	2	0	0	no vizinho	em casa	0	1	1	1 e 2	3	4	canico	600	300	posto de s. magumbo	1	2	2	2	2	0
7010	2007-02-09	Elsa V.Ernesto	Antonio Pedro	1,5m	3	0	0	no vizinho	no vizinho	sim	1	2	1 e 2	7	4	canico	600	300	posto de s. magumbo	1	1	1	2	2	0
7011	2007-02-09	Elsa V.Ernesto	Agnesio Antonio	6m	1	0	0	no vizinho	no vizinho	0	1	1	2	15	4	canico	400	250	magumbo e morrumbene	1	2	2	2	2	0
7012	2007-02-09	Elsa V.Ernesto	Lucio Alves	3	2	0	0	poco	em casa	sim	1	2	2		4	canico	500	200	magumbo e morrumbene	1	1	1	2	1	0
7013	2007-02-09	Elsa V.Ernesto	Tshefe Alves	1	4	0	0	poco	em casa	0	1	3	2		4	canico	500	200	magumbo e morrumbene	1	2	2	2	2	0
7014	2007-02-13	Lourenco Felimone	Americo Fernando	5m	1	0	0	poco	poco	0	1	1	2	9	3	2	400	2350?	morrumbene	1	2	2	2	2	0		ele e trabalhador de linga-linga e tem uma residencia la vai 1 vez a outra vizitar a familia em casa
7015	2007-02-13	Lourenco Felimone	Helder Manuel	6m	2	0	0	poco	poco	0	1	2	2	7	3	2	400	250	magumbo e morrumbene	1	1	1	2	2	0		eles sao trabalhadores de linga-linga e tem uma residencia la vai vizitar a familia durante fim da semana
7016	2007-02-13	Marden Pereira	Mauricio Bernardo	1	2	0	0	poco	poco	0	2	2	2	15	4	5	700	350	posto de s. magumbo	1	1	1	2	2	0	S23*44`211" E035*24`065"	Existem tambem suprvejos e eles sao trabalhadores de linga-linga e tem uma residencia la vao vizitar a familia durante fim da semana
7017	2007-02-13	Lourenco Felimone	Gito Armando	6m	2	0	0	poco	poco	0	1	2	2	5	3	2	350	250	morrumbene	1	2	2	2	2	0	S23*44`223" E035*24`055"	Existem tambem suprvejos e eles sao trabalhadores de linga-linga e tem uma residencia la vao vizitar a familia durante uma vez por mes
7018	2007-02-13	Marden Pereira	Sebastiao Francisco	2m	2	0	0	poco	poco	0	2	2	2	17,7	n/tem	2	300	220	posto de s. magumbo	1	2	2	2	2	0	S23*44`224" E035*24`052"	existem supervejos e eles sao de jogo mas trabalham em linga-linga.
7019	2007-02-13	Lourenco Felimone	Raul Ernesto	3	2	0	0	torneira proveniente do poco	torneira proveniente do poco	0	1	2	2	9	canico	canico	500	300	morrumbene	1	1	1	2	2	0	S23*44`244" E035*24`002"	sai semanalmente e tambem tem insectos.
7020	2007-02-09	Lourenco Felimone	Alfeu Botao	39	3	0	0	poco	poco	sim	2	2	3	0	4	4	800	600	morrumbene	1	1	2	2	2	1	S23*43`590" E035*24`391"	Nos anos passados passavam os vendedores ambulantes, mas apartir do ano 2006 ja nao.
7021	2007-02-09	Manuel Francisco	Nelson Manuel	3	1	0	0	no vizinho	em casa	0	1	1	2	16	4	canico	600	300	morrumbene	1	1	1	2	2	0	S23*43`563" E035*24`421"
7022	2007-02-09	Lourenco Felimone	Paulo Alfeu Botao	16	2	0	0	poco	poco	1	1	1	3	0	4	canico	700	350	morrumbene	1	1	1	2	1	1	S23*44`566" E035*24`423"
7023	2007-02-09	Elsa V.Ernesto	Fidelcia Paulo	4	4	0	0	no vizinho	em casa	0	1	2	3 e 4	2	4	canico	700	300	guikueleni	1	2	2	2	2	0	S23*43`569" E035*24`422"
7024	2007-02-09	Lourenco Felimone	Clesio Paulo	1	1	0	0	poco	poco	0	1	1	2	2	4	2	500	270	posto de s. magumbo	1	2	2	2	2	0	S23*43`563" E035*24`393"
7025	2007-02-09	Lourenco Felimone	Albertina Joao	3	1	0	0	poco	poco	0	1	1	2	1	4	2	500	300	posto de s. magumbo	1	2	2	2	2	0	S23*43`639" E035*24`392"
7026	2007-02-09	Manuel Francisco	Maria Celeste	5m	1	0	0	poco	poco	0	1	1	2	4	4	2	500	275	posto de s. magumbo	1	2	2	2	2	0	S23*43`646" E035*24`323"
7027	2007-02-09	Lourenco Felimone	Nina Galvao	6m	1	0	0	poco	poco	0	1	1	2	10	4	2	400	255	posto de s. magumbo	1	2	2	2	2	0	S23*43`651" E035*24`322"
7028	2007-02-09	Lourenco Felimone	Pedro Jose	15	2	0	sim	poco	poco	sim	1	1	3	12	4	canico	500	330	posto de s. magumbo	1	1	2	2	2	0	S23*43`615" E035*24`330"
7029	2007-02-09	Lourenco Felimone	Lino Texeira Botao	5m	2	0	0	poco	poco	sim	1	1	2	12	4	canico	440	272	posto de s. magumbo	1	1	2	2	2	0	S23*43`546" E035*24`390"
7030	2007-02-09	Manuel Francisco	Alfeu Lino	3	1	0	0	poco	poco	0	1	1	2	7	4	2	500	270	posto de s. magumbo	1	2	2	2	2	0	S23*43`540" E035*24`394"
7031	2007-02-09	Elsa V.Ernesto	Adelto Ernesto	4m	4	0	0	poco caseira	poco caseira	0	1	2	2		4 e canico	2	470	260	posto de s. magumbo	1	1	2	2	2	0	S23*43`467" E035*24`357"
7050	2007-02-09	Marden Pereira	Afonso Botao	53	4	0	0	no vizinho	no vizinho	sim	1	1	3	15			750	450	posto de s. magumbo	1	1	2	2	2	1	S23*43`452" E035*24`499"	Ha mosquitos quando chove; mais outros insectos picantes(supervejos) e mais frequentes do que o mosquito.
7051	2007-02-09	Marden Pereira	Regina Afonso	35	1	0	0	no vizinho	no vizinho	0	1	1	2	7,9	canico	2	450	250	posto de s. magumbo	1	2	1	2	2	0		Ha mais mosquitos quando chove e existem insectos que picam (supervejos).
7052	2007-02-09	Marden Pereira	Osvaldo Valdez	14	1	0	0	no vizinho	no vizinho	0	1	1	2	7	3 e caixas	2	309	270	posto de s. magumbo	1	2	2	2	2	0		Ha mais mosquitos quando chove e existem insectos que picam (supervejos). E sao mais picantes em relacao ao mosquito.
7053	2007-02-19	Dercio Paulo	Angelica Luis	6m	1	0	0	no vizinho	no vizinho	sim	1	1	2	6	2	2	500	300	posto de s. magumbo	1	2	2	2	2	0		mosquito e supervejos
7054	2007-02-09	Marden Pereira	Ercilio Jose	21	1	0	0	no vizinho	no vizinho	0	1	1	2	23	4	2	450	250	posto de s. magumbo	1	2	2	2	2	0		Ha mais mosquitos quando chove e existem insectos que picam (supervejos).
7055	2007-02-09	Marden Pereira	Afonso Botao	3	4	0	1	no vizinho	no vizinho	sim	3	3	3	0,5	4	4	750	300	posto de s. magumbo	1	2	2	2	2	1		Ha mais mosquitos quando chove e existem insectos que picam (supervejos). Ele duas casas por isso que nao dei o segundo PIN.
7056	2007-02-09	Marden Pereira	Silvio Joaquim	22	1	0	0	no vizinho	no vizinho	0	1	1	2	24.3	4	canico	500	350	posto de s. magumbo	1	2	2	2	2	0		ha mosquitos quando chove e tambem tem supervejos
7057	2007-02-17	Dercio Paulo	Joaquim Maleuga	38	3	0	0	em casa	em casa	sim	1	2	3	4	4	canico	700	400	posto de s. magumbo	1	1	2	2	2	1		mosquito e supervejos
7059	2007-02-17	Dercio Paulo	Dulce Joaquim	10	2	0	0	em casa	em casa	sim	2	2	2	4	4	canico	500	300	posto de s. magumbo	1	1	2	2	2	1*		furos no telhado e tem tambem mosquitos e supervejos.
7060	2007-02-17	Dercio Paulo	Esperanca Joaquim	3	2	0	0	em casa	em casa	0	1	1	2	4	4	2	400	300	posto de s. magumbo	1	2	2	2	2	0		mosquito e supervejos
7061	2007-02-17	Dercio Paulo	Antonio Paulino	23	1	0	0	em casa	em casa	0	1	1	2	4	4	canico	600	300	posto de s. magumbo	1	2	2	2	2	0		mosquito e supervejos
7062	2007-02-09	Marden Pereira	Osvaldo Armando	30	4	0	0	no vizinho	no vizinho	sim	2	2	1 e 2	21	4	canico	500	280	posto de s. magumbo	1	1	2	2	2	0		Existem supervejos
7063	2007-02-09	Marden Pereira	Rita Armando	24	1	0	0	no vizinho	no vizinho	0	1	1	2	15	2	2	350	230	posto de s. magumbo	1	2	2	2	2	0		Ha mais mosquitos quando chove e existem insectos que picam (supervejos).
7064	2007-02-09	Marden Pereira	Francisco Bato	36	3	0	0	no vizinho	no vizinho	sim	2	2	3	37			950	300	posto de s. magumbo	1	2	2	2	2	0		Ha mais mosquitos quando chove e existem insectos que picam (supervejos).
7065	2007-02-09	Marden Pereira	Benedita Sebastiao	8	3	0	0	no vizinho	no vizinho	sim	1	1	2	16	canico	2	500	320	posto de s. magumbo	1	2	2	2	2	0		Ha mais mosquitos quando chove e existem insectos que picam (supervejos).
7066	2007-02-09	Marden Pereira	Acacio Sebastiao	5	2	0	0	no vizinho	no vizinho	sim	1	1	3	10.7	4	canico	800	300	posto de s. magumbo	1	1	2	2	2	1		Ha mais mosquitos quando chove e existem insectos que picam (supervejos).
7067	2007-02-09	Marden Pereira	Balbina Francisco	2	2	0	0	no vizinho	no vizinho	sim	1	1	2	7.9	2	2	500	350	posto de s. magumbo	1	1	2	2	2	1		Ha mais mosquitos quando chove e existem insectos que picam (supervejos). Ele tem duas mulheres.
7069	2007-02-11	Dercio Paulo	Luisa Sebastiao	30	2	0	sim	no vizinho	no vizinho	sim	1	1	2	7	4	2	450	380	posto de s. magumbo	1	2	2	2	2	0
7070	2007-02-11	Dercio Paulo	Raquel Sebastiao	21	5	0	0	no vizinho	no vizinho	sim	1	2	2	6	3	2	400	300	posto de s. magumbo	1	2	2	2	2	0
7071	2007-02-11	Dercio Paulo	Adercio Lazaro	20	1	0	0	no vizinho	no vizinho	sim	1	1	2	10	4	2	400	250	posto de s. magumbo	1	1	1	2	2	0
7072	2007-02-11	Dercio Paulo	Jozeldo Joao	14	2	0	0	no vizinho	no vizinho	sim	1	1	2	12	2	2	300	230	posto de s. magumbo	1	2	2	2	2	0
7073	2007-02-12	Dercio Paulo	Joana Nhareluga	64	1	0	0	no vizinho	em casa	sim	1	1	2	4	4	canico	500	300	posto de s. magumbo	1	1	2	2	2	0
7074	2007-02-11	Dercio Paulo	Nilza Raquel	15	2	0	0	no vizinho	no vizinho	sim	1	1	2	12	4	2	450	280	posto de s. magumbo	1	2	2	2	2	0
7075	2007-02-14	Dercio Paulo	Lazaro Sebastiao	9	1	0	0	no vizinho	no vizinho	sim	1	1	2	3	4	canico	500	300	posto de s. magumbo	1	1	2	2	2	0		mosquitos e supervejos
7077	2007-02-11	Dercio Paulo	Elisa Joao	30	3	0	0	no vizinho	no vizinho	sim	1	1	2	22	3	2	500	290	posto de s. magumbo	1	2	2	2	2	0
7078	2007-02-11	Dercio Paulo	Gonsalves Caetano	13	1	0	0	no vizinho	no vizinho	0	1	1	2	6	3	2	400	270	posto de s. magumbo	1	2	2	2	2	0
7079	2007-02-11	Dercio Paulo	Juvencio Caetano	17	1	0	0	no vizinho	no vizinho	0	1	1	2	10			380	260	posto de s. magumbo	1	1	2	2	2	0
7080	2007-02-11	Dercio Paulo	Zelia Antonio	19	2	0	0	em casa	em casa	sim	1	1	2	3	3	2	400	280	posto de s. magumbo	1	2	2	2	2	0
7081	2007-02-11	Dercio Paulo	Virgilio Antonio	3	2	0	0	em casa	em casa	0	1	1	2	6	4	2	600	3000	posto de s. magumbo	1	1	1	2	2	0
7082	2007-02-11	Dercio Paulo	Acacio Antonio	1	2	0	0	em casa	em casa	sim	1	1	2	3	3	2	500	300	posto de s. magumbo	1	2	2	2	2	0
7083	2007-02-11	Dercio Paulo	Dionizia Antonio	27	5	0	0	em casa	em casa	0	1	1	3	3	4	5	500	300	posto de s. magumbo	1	2	2	2	2	0		ha mosquitos quando chove e tem tambem supevejos
7084	2007-02-11	Dercio Paulo	Caetano Carlos	78??	5	0	0	em casa	em casa	sim	2	2	3	2,5	4	4	800	800	posto de s. magumbo	1	1	1	2	1	1		ha mosquito quando chove
7085	2007-02-14	Dercio Paulo	Afonso Phalegue	6	2	0	0	no vizinho	no vizinho	sim	1	1	2	6furros	canico	2	400	290	posto de s. magumbo	1	1	2	2	2	0		mosquitos e supervejos
7086	2007-02-12	Dercio Paulo	Melita Pascoal	52	3	0	0	no vizinho	no vizinho	sim	1	2	3	3	4	canico	700	400	posto de s. magumbo	1	1	2	2	2	1		so mosquitos
7087	2007-02-12	Dercio Paulo	Esperanca Ernesto	64	3	0	0	em casa	em casa	sim	1	2	3	3	4	canico	700	300	posto de s. magumbo	1	1	1	2	2	1		tem supervejos
7088	2007-02-12	Dercio Paulo	Marta Paulino	77	1	0	0	em casa	em casa	0	1	1	2	5	2	canico	400	300	posto de s. magumbo	1	2	2	2	2	0
7089	2007-02-12	Dercio Paulo	Nelson Joaquim	3	2	0	0	em casa	em casa	sim	1	2	2	4	4	canico	500	290	posto de s. magumbo	1	1	2	2	2	0
7090	2007-02-12	Dercio Paulo	Claudina Maleuga		1	0	0	no vizinho	no vizinho	sim	1	1	2	4	2	2	400	300	posto de s. magumbo	1	1	2	2	2	0
7091	2007-02-12	Dercio Paulo	Amelia Maleuga	57!	1	0	0	no vizinho	no vizinho	0	1	1	2	4	2	2	500	290	posto de s. magumbo	1	2	2	2	2	0		mosquitos e supervejos
7092	2007-02-12	Dercio Paulo	Lopes Joaquim	17	1	0	0	em casa	em casa	0	1	1	2	4	4	2	400	280	posto de s. magumbo	1	1	2	2	2	0
7093	2007-02-12	Dercio Paulo	Armando Botao	35	3	0	0	em casa	em casa	sim	3	3	3	3	4	4	800	800	posto de s. magumbo	1	1	2	2	1	0
7094	2007-02-09	Dercio Paulo	Wugui Naene	80	1	0	0	no vizinho	no vizinho	0	1	1	3	5	3	2	600	400	posto de s. magumbo	1	2	2	2	2	0
7095	2007-05-30	Dercio Paulo	Laura Bata	2	1	0	0	no vizinho	no vizinho	sim	1	1	3	5	4	canico	500	300	posto de s. magumbo	1	1	2	2	2	0		mosquitos e supervejos
7096	2007-02-09	Marden Pereira	Luis Mateus	n/sabem	3	0	0	em casa	em casa	sim	1	1		0.5	4	4	500	300	posto de s. magumbo	1	1	2	2	2	0		ha mosquitos quando chove e tambem tem supervejos
7097	2007-02-09	Marden Pereira	Jose Luis	10	1	0	0	em casa	em casa	sim	1	1	2	11	laca-laca e caixas	2	307	200	posto de s. magumbo	1	2	2	2	2	0		ha mosquitos quando chove e tambem tem supervejos
7098	2007-02-12	Dercio Paulo	Sandra Ernesto	37	2	0	0	no vizinho	no vizinho	0	3	3	3	4	4	4	900	800	posto de s. magumbo	1	2	2	2	2	0		mosquitos e supervejos
7100	2007-02-11	Dercio Paulo	Marta da Gloria	50	2	0	1	no vizinho	no vizinho	sim	1	1	3	9	4	2	600	400	posto de s. magumbo	1	1	1	1	1	0
7101	2007-02-11	Dercio Paulo	Adercio Francelino	16	1	0	0	no vizinho	no vizinho	sim	1	1	2	40			400	290	posto de s. magumbo	1	1	2	2	2	0
7102	2007-02-12	Dercio Paulo	Armandinho Joao	16	2	0	0	no vizinho	no vizinho	sim	1	1	2	4	3	2	400	290	??	1	2	2	2	2	0
7103	2007-02-12	Dercio Paulo	Delefina Fernando	59	2	0	0	no vizinho	no vizinho	sim	3	2	3	4	4	4	800	700	posto de s. magumbo	1	2	2	2	2	0
7104	2007-02-12	Dercio Paulo	Hortencia Carlos	32	1	0	0	em casa	em casa	sim	1	1	3	4	4	canico	500	390	posto de s. magumbo	1	1	1	2	2	0
7105	2007-02-12	Dercio Paulo	Angelica Antonio	38	2	0	0	em casa	em casa	sim	1	1	3	3	4	4	800	400	posto de s. magumbo	1	1	1	2	2	0
7106	2007-03-06	Manuel Francisco	Miguel Manguaula	82	2	0	0	poco	poco	sim	1	1	3	10	4	4	750	650	posto de s. magumbo	1	2	2	2	2	0		tem folgas na parede que podem entrar mosquitos e tambem ha mosquitos e suprvejos
7107	2007-02-12	Dercio Paulo	Jose Francelino	28	3	0	0	no vizinho	no vizinho	0	1	2	3	3	4	canico	750	400	posto de s. magumbo	1	1	1	2	1	0		burracos no telhado
7108	2007-02-14	Dercio Paulo	Nelson Gildo	10m	3	0	0	no vizinho	no vizinho	sim	1	1	2	6	2	2	500	300	posto de s. magumbo	1	1	2	2	2	0		mosquitos e supervejos
7109	2007-02-11	Dercio Paulo	Afonso Fernando	40	4	0	1	no vizinho	em casa	sim	1	2	3	11	2	2	700	400	posto de s. magumbo	1	2	2	2	2	0
7110	2007-02-11	Dercio Paulo	Paulo Afonso	12??	1	0	0	no vizinho	no vizinho	sim	1	1	2	15	2	2	300	200	posto de s. magumbo	1	2	2	2	2	0
7111	2007-02-12	Dercio Paulo	Joaquim Sumburane	75	1	0	0	no vizinho	no vizinho	sim	1	1	3	4	4	canico	600	390	posto de s. magumbo	1	1	2	2	2	0
7112	2007-02-12	Dercio Paulo	Carmelina Chico	16	3	0	0	no vizinho	no vizinho	sim	1	1	2	6	4	canico	500	300	posto de s. magumbo	1	1	2	2	2	0		mosquito e supervejos
7113	2007-02-12	Dercio Paulo	Madalena Rafael	71	2	0	0	no vizinho	no vizinho	sim	1	1	2	6	4	canico	500	290	posto de s. magumbo	1	1	2	2	2	0
7114	2007-02-11	Dercio Paulo	Nelson Afonso	19	1	0	0	no vizinho	no vizinho	sim	1	1	2	9	4	2	400	250	posto de s. magumbo	1	2	2	2	2	0
7115	2007-02-21	Dercio Paulo	Francisco Rafael	10	0*	0	0*	no vizinho	no vizinho	sim	1	2	3	4	4	canico	600	300	posto de s. magumbo	1	1	2	2	2	0		sempre ha mosquito
7116	2007-02-27	Dercio Paulo	Gildo Rafael	10	1	0	0	no vizinho	no vizinho	sim	1	1	3	4	4	canico	600	300	posto de s. magumbo	1	1	2	2	2	0		ha mosquitos quando chove
7118	2007-02-17	Dercio Paulo	Fernando Botao	40	4	0	0	em casa	em casa	sim	3	3	3	0.35	4	4	900	800	posto de s. magumbo	1	1	1	2	1	0		tem mosquitos e supervejos
7119	2007-02-23	Dercio Paulo	Isabel Bernardo	40	2	0	0	em casa	em casa	sim	2	2	3	6	4	canico	600	400	posto de s. magumbo	1	1	2	2	2	0		ha mosquito quando chove
7122	2007-02-23	Dercio Paulo	Helena Naene	30	1	0	0	no vizinho	no vizinho	sim	1	1	2	6	4	canico	500	300	posto de s. magumbo	1	2	2	2	2	0		mosquito e supervejos
7125	2007-02-23	Dercio Paulo	Amelia Bambo	40	1	0	0	em casa	em casa	sim	1	1	3	4	4	4	800	400	posto de s. magumbo	1	2	2	2	2	0		mosquitos e supervejos
7136	2007-02-11	Dercio Paulo	Isabel Pedro	73	1	0	0	em casa	em casa	sim	1	1	3	4	4	2	700	400	posto de s. magumbo	1	2	2	2	2	0
7137	2007-02-24	Dercio Paulo	Silva Francisco	4	2	0	0	no vizinho	no vizinho	sim	1	1	2	6	2	2	500	290	posto de s. magumbo	1	1	2	2	2	0		so mosquitos
7198	2007-05-25	Dercio Paulo	Marta Joao Rafael	1	3	0	0	em casa	em casa	sim	2	2	2	6	4	canico	600	300	posto de s. magumbo	1	2	2	2	2	0		mosquitos e supervejos
7138	2007-02-24	Dercio Paulo	Etelevina Jorge	1	3	0	0	no vizinho	no vizinho	sim	2	2	2	7	4	2	500	290	posto de s. magumbo	1	1	2	2	2	0		mosquitos e supervejos
7139	2007-02-23	Dercio Paulo	Joao Rafael	5	2	0	0	no vizinho	no vizinho	sim	1	1	2	3	4	canico	500	295	posto de s. magumbo	1	1	2	2	1	1		mosquitos e supervejos
7140	2007-02-10	Manuel Francisco	Teofelo Domingos	8	5	0	0	poco	poco	sim	2	2	3	3	4	4	1000	900	posto de s. magumbo	1	1	1	2	2	0
7141	2007-02-10	Marden Pereira	Joaquina Rafael	10	1	0	0	poco	poco	sim	1	1	2	11	2 e canico		400	260	??	1	2	2	2	2	0
7142	2007-02-10	Marden Pereira	Angelica Francisco	30	2	0	0	no vizinho	no vizinho	sim	1	1	2	15	2	2	500	350	posto de s. magumbo	1	1	2	2	2	0		existem mosquitos; supervejos tambem tem mas nao entram dentro da casa.
7143	2007-02-10	Manuel Francisco	Amelia Armando	20	2	0	0	poco	poco	sim	1	1	3	0	4	4	700	360	posto de s. magumbo	2	1	2	2	1	1		Nao tem rede nos venteladores; e tem supervejos mas raramente entram dentro da casa.
7144	2007-02-10	Manuel Francisco	Manuel Rafael	5	2	0	0	poco	poco	sim	1	1	3	7	4	canico	530	300	posto de s. magumbo	1	1	1	2	2	0
7145	2007-02-10	Marden Pereira	Marta Manuel	2	2	0	0	no vizinho	no vizinho	0	1	1	2	12.6	3	2 e canico	366	250	posto de s. magumbo	1	2	2	2	2	0		tem supervejos mas nao entram dentro da casa.
7146	2007-02-10	Manuel Francisco	Victoria Venancio	?	3	0	0	poco	poco	0	1	1	2	8	2	2	450	290	posto de s. magumbo	1	2	2	2	2	0
7147	2007-02-10	Manuel Francisco	Venancio Joaquim	7	2	0	0	poco	poco	sim	1	1	3	10	4	canico	480	300	posto de s. magumbo	1	1	2	2	1	0
7148	2007-02-10	Marden Pereira	Julia Augusto	13	2	0	0	poco	poco	sim	1	1	3	17.4	2	2	720	450	posto de s. magumbo	1	1	1	2	1	0		tem supervejos mas nao entram dentro da casa.
7149	2007-02-10	Marden Pereira	Rosa Venancio	13	4	0	0	poco	poco	0	3	3	2	11	2	2	450	210	posto de s. magumbo	1	2	2	2	2	0		existem mas nao entram dentro do burracos??
7150	2007-02-10	Manuel Francisco	Rosita Joao	1	2	0	0	poco	poco	0	1	1	2	21			340	230	posto de s. magumbo	1	1	2	2	2	0
7151	2007-02-10	Marden Pereira	Isabel Armaldo	7	5	0	0	poco	poco	0	2	2	2	11	2	2	350	230	posto de s. magumbo	1	1	2	2	2	0		tem supervejos mas nao entram dentro da casa.
7152	2007-02-10	Manuel Francisco	Mussa Mamudo	2	1	0	0	poco	poco	0	1	1	2	11.3	esteira	canico	500	300	posto de s. magumbo	1	2	2	2	2	0		a porta e uma esteira colocada e tem muitos mosquitos
7153	2007-02-10	Manuel Francisco	Joaquina Joao	45	1	0	0	poco	poco	sim	2	1	3		4	4	700	400	posto de s. magumbo	1	1	2	2	2	0
7154	2007-02-10	Manuel Francisco	Wogoma Mbicane	1	1	0	0	poco	poco	0	1	1	2	10	2	2	300	200	??	1	2	2	2	2	0		existem mosquitos e supervejos mas nao entram dentro da casa.
7155	2007-02-10	Marden Pereira	Marta Antonio	52	1	0	0	poco	poco	0	1	1	2	18.1	2	2	400	250	posto de s. magumbo	1	2	2	2	2	0		so mosquitos e que actuam.
7158	2007-02-10	Marden Pereira	Marta Francisco	2	1	0	0	poco	poco	sim	1	1	3	5	canico	canico	600	300	??	1	2	2	2	2	0		ha muitos musquitos e menos supervejos porque esta proximo da lagoa.
7159	2007-02-10	Marden Pereira	Bendito Francisco	12	1	0	0	poco	poco	0	1	1	3	2	4	3	700	400	posto de s. magumbo	1	2	2	2	2	0		ha muitos musquitos e menos supervejos porque esta proximo da lagoa.
7160	2007-02-10	Marden Pereira	Joaquina Jonasse	30	2	0	0	poco	poco	0	2	2	2	26	4	2 e canico	590	373	posto de s. magumbo	1	2	2	2	2	0		ha muitos musquitos e menos supervejos porque esta proximo da lagoa.
7161	2007-02-10	Marden Pereira	Fernando Americo	2	1	0	0	poco	poco	0	1	1	2	12.6	3	2	300	200	posto de s. magumbo	1	2	2	2	2	0		ha muitos musquitos e menos supervejos porque esta proximo da lagoa.
7165	2007-02-10	Manuel Francisco	Resilia Mbata	3	2	0	0	poco	na lagoa	sim	1	1	2	0	2	2	490	300	?	1	2	2	2	2	1
7166	2007-02-10	Marden Pereira	Fernando Paulo	20	1	0	0	poco	na lagoa	0	1	1	2	19	2	2	570	300	posto de s. magumbo	1	2	2	2	2	0		tem supervejos mas nao entram dentro da casa o que ha de mais sao mosquitos.
7167	2007-02-10	Marden Pereira	Ivone Fernando	15	1	0	0	poco	na lagoa	0	1	1	2	10	2	2	380	200	posto de s. magumbo	1	2	2	2	2	0		tem supervejos e mosquitos com frequencia.
7168	2007-05-22	Manuel Francisco	Luisa Mendes	7	1	0	0	poco	poco	0	1	1	2	10	2	2	350	200	posto de s. magumbo	1	1	2	2	2	0		tem supervejos so
7169	2007-05-21	Dercio Paulo	Ana Francisco	7	1	0	0	no vizinho	no vizinho	sim	1	1	2	9	2	2	500	290	posto de s. magumbo	1	1	2	2	2	0		so mosquitos
7170	2007-05-21	Manuel Francisco	Gloria Timoteo	3	1	0	0	poco	poco	0	1	1	2	10	2	2	350	250	posto de s. magumbo	1	2	2	2	2	0		tem supervejos so
7171	2007-03-01	Manuel Francisco	Marcelino Antonio	1	1	0	0	poco	poco	0	1	1	2	10	2	2	400	250	posto de s. magumbo	1	2	2	2	2	0		e sempre supervejos
7172	2007-05-21	Dercio Paulo	Lino Antonio	3	1	0	0	no vizinho	no vizinho	0	1	1	2	7	2	2	480	290	posto de s. magumbo	1	2	2	2	2	0		so mosquitos
7173	2007-05-22	Manuel Francisco	Hawa Sagal	7	6	0	0	poco	poco	sim	1	3	2	5	canico	2	500	250	posto de s. magumbo	1	1	2	2	2	0		tem supervejos so
7174	2007-05-22	Manuel Francisco	Isabel Paulo	8	3	0	0	poco	poco	sim	1	2	2	10	2	2	500	250	posto de s. magumbo	1	2	2	2	2	0		tem supervejos so
7175	2007-05-22	Manuel Francisco	Cecilia Venancio	3	4	0	0	poco	poco	0	1	2	2	7	2	2	400	250	posto de s. magumbo	1	2	2	2	2	0		tem supervejos so
7176	2007-02-13	Lourenco Felimone	Laura Fernando	10	3	0	0	poco	poco	sim	2	2	2	15	2	2	500	300	posto de s. magumbo	1	1	2	2	2	0
7177	2007-02-13	Lourenco Felimone	Amade Augusto	1	3	0	0	poco	poco	0	1	1	2	4	canico	2	450	280	posto de s. magumbo	1	2	2	2	2	0
7178	2007-05-28	Dercio Paulo	Fernando Manuel	40	2	0	0	em casa	em casa	sim	1	1	3	5	4	canico	700	400	posto de s. magumbo	1	1	1	2	1	0		mosquitos e supervejos
7179	2007-05-28	Dercio Paulo	Carvalio Fernando	6	3	0	0	em casa	em casa	0	1	1	3	3	4	canico	800	600	posto de s. magumbo	1	1	1	2	2	0		mosquitos e supervejos
7180	2007-05-28	Dercio Paulo	Renis Fernando	2	1	0	0	em casa	em casa	0	1	1	3	4	4	canico	600	320	posto de s. magumbo	1	1	1	2	2	0		ha mosquitos quando chove
7181	2007-05-28	Dercio Paulo	Barminio Candida	1	1	0	0	em casa	em casa	sim	1	1	2	6	4	canico	550	300	posto de s. magumbo	1	1	1	2	2	0		mosquitos e supervejos
7182	2007-05-28	Dercio Paulo	Gildo Fernando	2	2	0	0	em casa	em casa	sim	1	1	3	7	4	canico	500	300	posto de s. magumbo	1	1	1	2	2	0		mosquitos e supervejos
7183	2007-02-14	Dercio Paulo	Afonso Joaquim	5	2	0	0	no vizinho	no vizinho	sim	1	1	2	6	4	2	600	400	posto de s. magumbo	1	2	2	2	2	0		tem mosquitos e supervejos
7184	2007-02-14	Dercio Paulo	Telma Afonso	3	1	0	0	no vizinho	no vizinho	0	1	1	2	4	4	2	500	300	posto de s. magumbo	1	2	2	2	2	0		tem mosquitos e supervejos
7185	2007-02-14	Dercio Paulo	Aderito Afonso	1	3	0	0	no vizinho	no vizinho	0	1	1	2	3	2	2	300	200	posto de s. magumbo	1	2	2	2	2	0		a porta tem aberturas grandes; por isso tem mosquitos e supervejos
7186	2007-02-12	Lourenco Felimone	Pascoal Ofisso	4	2	0	0	poco	poco	sim	1	1	3	4	4	canico	600	350	posto de s. magumbo	1	1	2	2	2	0
7187	2007-02-14	Dercio Paulo	Lidia Francisco	6	3	0	0	no vizinho	no vizinho	0	1	1	2	3	4	canico	500	300	posto de s. magumbo	1	1	2	2	2	0		tem mosquitos e supervejos
7188	2007-02-14	Dercio Paulo	Francisco Ofisso		1	0	0	no vizinho	no vizinho	0	1	1	2	6	4	canico	500	300	posto de s. magumbo	1	1	2	2	2	0		tem mosquitos e supervejos
7189	2007-02-12	Lourenco Felimone	Caetano Joaquim	2	2	0	0	poco	poco	sim	1	1	2	6	4	canico	500	300	posto de s. magumbo	1	1	2	2	2	0
7190	2007-02-12	Lourenco Felimone	Antonio Jose Antonio	3	3	0	0	poco	poco	0	2	2	3	8	4	2	400	250	posto de s. magumbo	1	1	1	2	2	0
7191	2007-02-12	Lourenco Felimone	Dercio Antonio	2	2	0	0	poco	poco	0	1	2	2	20	4	2	350	200	posto de s. magumbo	1	1	2	2	2	0		a porta apresenta um grande burraco de 0,5cm de largura e 150cm de cumprimento.
7192	2007-02-21	Dercio Paulo	Tiago Jose	17	5	0	1	no vizinho	no vizinho	sim	1	2	2	5.75	4	canico	500	300	posto de s. magumbo	1	2	2	2	2	0		tem burracos na parede e tambem tem mosquitos e supervejos
7197	2007-02-17	Dercio Paulo	Eduardo Joaquim	5	5	0	0	no vizinho	no vizinho	sim	1	2	2	3	4	canico	600	300	posto de s. magumbo	1	1	2	2	2	0		tem mosquitos e supervejos
7200	2007-02-10	Lourenco Felimone	Alfredo Jorge	27	6	0	0	poco	poco	sim	2	3	3	0	4	4	850	700	posto de s. magumbo	1	1	2	2	2	0		outros insectos
7201	2007-02-10	Lourenco Felimone	Nelson Alfredo	3	4	0	0	poco	poco	sim	2	2	2	7	2	2	400	320	posto de s. magumbo	1	2	2	2	2	0
7202	2007-02-10	Lourenco Felimone	Albertina Siquisse	2	3	0	sim	poco	poco	sim	2	3	2	9	4	2	500	360	posto de s. magumbo	1	1	2	2	2	0
7203	2007-02-10	Lourenco Felimone	Abiguela Rafael	2	2	0	0	poco	poco	sim	2	2	2	11	4	canico	400	300	posto de s. magumbo	1	1	1	2	2	0
7204	2007-02-10	Lourenco Felimone	Felex Francisco	6m	1	0	0	poco	poco	0	1	1	2	12	2	2	410	340	posto de s. magumbo	1	2	2	2	2	0
7205	2007-02-10	Lourenco Felimone	Maria Wiliamo	2	3	0	0	poco	poco	sim	2	2	2	5	4	2	450	320	posto de s. magumbo	1	2	2	2	2	0
7207	2007-02-11	Manuel Francisco	Catarina Joaquim	3m	2	0	0	poco	poco	0	1	1	2	7	2	2	300	250	posto de s. magumbo	1	1	2	2	2	0
7208	2007-02-11	Manuel Francisco	Raul Filipe	??	2	0	0	poco	poco	0	2	2	2	15	2	canico	400	300	posto de s. magumbo	1	2	2	2	2	0
7209	2007-02-10	Lourenco Felimone	Joaquim Rafael	1,6m	4	0	0	poco	poco	sim
7210	2007-02-10	Lourenco Felimone	Edna Francisco	2m	2	0	0	poco	poco	0	2	2	2		2	2	300	200	posto de s. magumbo	1	2	2	2	2	0
7211	2007-02-10	Lourenco Felimone	Claudencia Custodio	2m	1	0	0	poco	poco	0	1	1	2		2		300	210	posto de s. magumbo	1	2	2	2	2	0
7212	2007-02-11	Manuel Francisco	Antonio Matavata	1	2	0	0	poco	poco	sim	1	2	2	3	2	canico	500	300	posto de s. magumbo	1	1	2	2	2	0
7213	2007-02-11	Manuel Francisco	Eulalio Antonio	3m	1	0	0	poco	poco	0	1	1	2	10	2	canico	400	200	posto de s. magumbo	1	1	2	2	2	0
7214	2007-02-11	Manuel Francisco	Crimilda Antonio	2	3	0	0	poco	poco	0	2	2	2	10	2	2	400	300	posto de s. magumbo	1	2	2	2	2	0
7215	2007-02-11	Manuel Francisco	Mercia Rui	2	1	0	0	poco	poco	0	1	1	2	10	2	2	350	250	posto de s. magumbo	1	2	2	2	2	0
7216	2007-02-17	Manuel Francisco	Lucrencia Joaquim	1	2	0	0	poco	poco	0	1	1	2	6	canico	2	400	200	posto de s. magumbo	1	2	2	2	2	0		tem mosquitos sim
7217	2007-02-11	Manuel Francisco	Joaquim Bernardo	3	1	0	0	poco	poco	0	1	1	2	0	?	?	500	250	posto de s. magumbo	1	2	2	2	2	0
7218	2007-02-11	Manuel Francisco	Joaquim Antonio	2	2	0	0	poco	poco	sim	1	1	2	17	4	canico	500	300	posto de s. magumbo	1	1	2	2	2	1
7219	2007-02-11	Manuel Francisco	Fernando Jossai	4	2	0	0	poco	poco	sim	1	1	2	15	canico	canico	400	300	posto de s. magumbo	1	1	2	2	2	0
7220	2007-03-01	Manuel Francisco	Ernesto Fernando	1	2	0	0	poco	poco	0	1	1	2	7	canico	2	400	250	posto de s. magumbo	1	1	2	2	2	0		e sempre supervejos
7221	2007-02-11	Manuel Francisco	Guilhermina Botao	26	2	0	sim	poco	poco	sim	2	2	3	0			600	400	posto de s. magumbo	1	2	2	2	2	0
7222	2007-02-11	Manuel Francisco	Aparicio Valdiz	2	1	0	0	poco	poco	0	1	1	2	10			400	300	posto de s. magumbo	1	2	2	2	2	0
7223	2007-02-11	Manuel Francisco	Andre Santos	5	5	0	0	poco	poco	sim	2	2	2	10	4	2	450	350	posto de s. magumbo	1	1	2	2	2	0
7224	2007-02-17	Manuel Francisco	Fatima Armando	5m	2	0	0	poco	poco	sim	1	1	2	10	2	2	350	250	morrumbene	1	1	1	2	2	0		e sempre supervejos
7225	2007-02-11	Manuel Francisco	Isabel Mateus	5	1	0	0	poco	poco	sim	1	2	3	0	4	canico	700	353	morrumbene	1	1	2	2	2	0
7226	2007-02-11	Manuel Francisco	Jose Joao	1	2	0	0	poco	poco	sim	1	1	3	0	4	canico	500	300	posto de s. magumbo	1	1	1	2	2	0
7227	2007-05-19	Manuel Francisco	Tiburcio Paulo	3	3	0	0	poco	poco	sim	1	2	2	10	canico	canico	600	300	posto de s. magumbo	1	2	2	2	2	0		tem supervejos so
7228	2007-02-11	Manuel Francisco	Raul Sebastiao	1m	1	0	0	poco	poco	0	1	1	2	4	2	2	400	300	posto de s. magumbo	1	2	2	2	2	0
7229	2007-02-11	Manuel Francisco	Sebastiao Magavas	2	2	0	0	poco	poco	sim	1	1	2	7	canico	2	400	300	posto de s. magumbo	1	1	2	2	2	0
7230	2007-02-11	Manuel Francisco	Baptista Feliciano	4	2	0	0	poco	poco	sim	1	1		10	4	canico	500	300	posto de s. magumbo	1	1	1	2	2	0
7231	2007-02-18	Manuel Francisco	Pascoa Antonio	4	4	0	0	no vizinho	em casa	sim	1	3	2	20	4	2	500	350	posto de s. magumbo	1	2	2	2	2	0		supervejos so
7232	2007-02-19	Manuel Francisco	Milagrosa Jose	2	4	0	0	poco	poco	0	1	2	2	15	2	2	300	250	posto de s. magumbo	1	2	2	2	2	0		supervejos so
7233	2007-02-19	Manuel Francisco	Gilberto Jose	2	1	0	0	poco	poco	0	1	1	2	15	4	2	450	250	posto de s. magumbo	1	2	1	2	2	0		supervejos so
7234	2007-02-13	Manuel Francisco	Maria Saete	2m	1	0	0	poco	poco	sim	1	1	2	5	4	canico	450	250	posto de s. magumbo	1	1	2	2	2	0
7235	2007-02-13	Manuel Francisco	Nilda Jose	1,3m	2	0	0	poco	poco	0	1	1	2	15	4	2	400	250	posto de s. magumbo	1	2	2	2	2	0
7236	2007-02-13	Manuel Francisco	Ivo Maria	?	3	0	0	poco	poco	0	1	1	2	15	2	2	300	250	posto de s. magumbo	1	2	2	2	2	0
7238	2007-02-19	Manuel Francisco	Roque Alberto	3	2	0	0	poco	poco	sim	1	1	3	5	4	canico	500	300	posto de s. magumbo	1	1	2	2	2	0		supervejos so
7237	2007-02-19	Manuel Francisco	Micaela Paulo	2	4	0	0	poco	poco	sim	1	2	2	15	2	2	400	200	posto de s. magumbo	1	2	2	2	2	0		supervejos so
7239	2007-02-19	Manuel Francisco	Esperanca Guilhermine	1	2	0	0	poco	poco	0	1	1	2		3	canico	450	250	posto de s. magumbo	1	2	2	2	2	0		supervejos so
7240	2007-02-19	Manuel Francisco	Guilhermina Jorge	3	4	0	0	poco	poco	sim	1	2	3	10	4	canico	500	300	posto de s. magumbo	1	1	2	2	2	0		supervejos so
7243	2007-02-12	Lourenco Felimone	Catarina Nguila	*+30	1	0	sim	poco	poco	sim	1	1	3	0	4	4	700	350	posto de s. magumbo	1	1	2	2	2	0
7244	2007-02-12	Lourenco Felimone	Maria Eduardo	2,6m	1	0	0	poco	poco	0	1	1	3	13	2	2	400	310	posto de s. magumbo	1	2	2	2	2	0
7245	2007-02-12	Lourenco Felimone	Fernando Miguel	8m	2	0	0	poco	poco	0	1	1	2	8	2	2	280	170	posto de s. magumbo	1	2	2	2	2	0
7246	2007-02-12	Lourenco Felimone	Miguel Jose	5	6	0	0	poco	poco	sim	1	3	3	16	4	canico	550	250	posto de s. magumbo	1	1	2	2	2	0
7247	2007-02-12	Lourenco Felimone	Rodrigues Miguel	10m	1	0	0	poco	poco	0	1	1	2	6	caixas	2 e canico	320	250		1	1	2	2	2	0
7248	2007-02-12	Lourenco Felimone	Alfeu Joao	1,5m	1	0	0	poco	poco	sim	1	1	2	4	4	canico	450	280	posto de s. magumbo	1	2	1	2	2	1
7249	2007-02-12	Lourenco Felimone	Arlindo Joao	2	1	0	0	poco	poco	0	1	1	2	7	caixas	2	300	150	posto de s. magumbo	1	1	2	2	2	0
7250	2007-02-12	Lourenco Felimone	Domingos Joao	1	5	0	0	poco	poco	sim	2	3	2	3	4	canico	420	320	posto de s. magumbo	1	1	2	2	2	0
7251	2007-05-25	Dercio Paulo	Julia Fernando	10	2	0	0	no vizinho	no vizinho	sim	1	1	2	9	2	2	400	280	posto de s. magumbo	1	1	2	2	2	0		ha mosquitos quando chove
7252	2007-02-18	Dercio Paulo	Jovito Armando	30	2	0	0	em casa	em casa	sim	1	1	3	4	4	canico	700	400	posto de s. magumbo	1	2	2	2	2	0		tem mosquitos sim
7253	2007-02-18	Dercio Paulo	Florencio Jovito	30??	2	0	0	em casa	em casa	sim	1	1	2	4	4	2	400	290	posto de s. magumbo	1	1	2	2	2	0		mosquito e supervejos
7254	2007-02-17	Dercio Paulo	Atanasio Jovito	3	2	0	0	no vizinho	no vizinho	sim	1	1	2	6	4	canico	400	290	posto de s. magumbo	1	2	1	2	2	0		tem mosquitos sim
7255	2007-02-14	Dercio Paulo	Lucio Alberante	3	5	0	0	no vizinho	no vizinho	sim	2	2	3	vetelador	4	4	800	800	posto de s. magumbo	1	1	1	2	1	0		mosquitos e supervejos
7256	2007-02-14	Dercio Paulo	Danubio Lucio	2	1	0	0	no vizinho	no vizinho	sim	1	1	2	4	4	canico	400	260	posto de s. magumbo	1	1	1	2	1	0		mosquitos e supervejos
7257	2007-02-14	Dercio Paulo	Lucia Armando	7m	1	0	0	no vizinho	no vizinho	0	1	1	2	4	2	canico	400	290	posto de s. magumbo	1	2	2	2	2	0		mosquitos e supervejos
7258	2007-02-14	Dercio Paulo	Jose Botao	7	3	0	0	no vizinho	no vizinho	sim	1	1	2	9	2	2	500	400	posto de s. magumbo	1	1	2	2	2	0		mosquitos e supervejos
7259	2007-02-14	Dercio Paulo	Ivo Jose	3	1	0	0	no vizinho	no vizinho	0	1	1	2	5	2	2	320	260	posto de s. magumbo	1	1	2	2	2	0		mosquitos e supervejos
7260	2007-02-14	Dercio Paulo	Esperanca Mateus	1	2	0	0	no vizinho	no vizinho	0	1	1	2	6	2	2	350	250	posto de s. magumbo	1	2	2	2	2	0		mosquitos e supervejos
7261	2007-02-21	Dercio Paulo	Juvencio Caetano	3	3	0	0	no vizinho	poco	0	1	1	1	6	4	canico	500	300	posto de s. magumbo	1	1	2	2	2	0		mosquitos e supervejos
7263	2007-02-21	Dercio Paulo	Inocencia Caetano	3m	1	0	0	no vizinho	no vizinho	sim	1	1	2	4	3	2	400	280	posto de s. magumbo	1	2	2	2	2	0		so mosquitos
7264	2007-02-18	Dercio Paulo	Augusto Joaquim	5	4	0	0	em casa	em casa	sim	1	2	2	4	4	canico	500	300	posto de s. magumbo	1	1	2	2	2	1		mosquitos e supervejos
7265	2007-02-18	Dercio Paulo	Edimundo Eduardo	1	1	0	0	no vizinho	no vizinho	sim	1	1	2	3	2	2	300	260	posto de s. magumbo	1	1	2	2	2	0		mosquito e supervejos
7266	2007-02-18	Dercio Paulo	Joao Joaquim	5	2	0	0	em casa	em casa	sim	1	1	2	3	4	canico	500	300	posto de s. magumbo	1	1	2	2	2	0		mosquito e supervejos
7267	2007-02-18	Dercio Paulo	Luis Joaquim	4	4	0	0	em casa	em casa	sim	1	2	2	4	4	canico	500	300	posto de s. magumbo	1	1	2	2	2	0		mosquitos e supervejos
7268	2007-02-18	Dercio Paulo	Judite Joaquim	3	1	0	0	no vizinho	no vizinho	sim	1	1	2	3	2	2	400	290	posto de s. magumbo	1	2	2	2	2	0		mosquito e supervejos
7269	2007-02-18	Dercio Paulo	Lutercia Eduardo	2	2	0	0	em casa	em casa	sim	1	1	2	4	2	2	400	280	posto de s. magumbo	1	2	2	2	2	0		mosquito e supervejos
7270	2007-02-18	Dercio Paulo	Joao Francisco	30	2	0	0	no vizinho	no vizinho	sim	1	1	3	2.75	4	canico	700	400	posto de s. magumbo	1	1	2	2	2	0		ha mosquitos quando chove
7271	2007-02-18	Dercio Paulo	Juvencio Francosco	2	1	0	0	no vizinho	no vizinho	0	1	1	2	7	3	2	380	260	posto de s. magumbo	1	2	2	2	2	0
7273	2007-02-18	Dercio Paulo	Feliz Rafael	6	2	0	0	no vizinho	no vizinho	sim	1	1	1	3	4	canico	500	300	posto de s. magumbo	1	1	1	2	2	0		ha mosquitos quando chove
7274	2007-02-18	Dercio Paulo	Luis Joaquim	1	2	0	0	no vizinho	no vizinho	sim	1	1	2	6	4	2	500	300	posto de s. magumbo	1	2	2	2	2	0		mosquitos e supervejos
7278	2007-02-21	Dercio Paulo	Otinha Lino	1	2	0	0	em casa	em casa	sim	1	1	2	3	2	2	400	280	posto de s. magumbo	1	2	2	2	2	0		tem mosquitos quando chove
7279	2007-02-21	Dercio Paulo	Alzira Oliveira	7	4	0	0	em casa	em casa	0	1	2	2	6	2	2	500	300	posto de s. magumbo	1	2	2	2	2	0		so mosquitos
7280	2007-02-18	Dercio Paulo	Cardelino Antonio	9	1	0	0	em casa	em casa	sim	1	1	2	6	4	2	400	290	posto de s. magumbo	1	1	2	2	2	1		mosquito e supervejos
7281	2007-02-18	Dercio Paulo	Jose Antonio Jose	3	2	0	0	no vizinho	no vizinho	sim	1	1	2	3	4	2	400	290	posto de s. magumbo	1	1	2	2	2	0		mosquitos e supervejos
7282	2007-02-18	Dercio Paulo	Vasco Antonio	4m	1	0	0	no vizinho	no vizinho	sim	1	1	2	4	2	2	300	230	posto de s. magumbo	1	2	2	2	2	0		mosquito e supervejos
7283	2007-05-25	Dercio Paulo	Raquel Antonio	40	1	0	0	no vizinho	no vizinho	sim	1	1	2	6	4	2	600	290	posto de s. magumbo	1	2	2	2	2	0		ha mosquitos quando chove
7284	2007-05-25	Dercio Paulo	Nelson Ernesto	1	1	0	0	no vizinho	no vizinho	sim	1	1	2	4	4	2	400	280	posto de s. magumbo	1	1	2	2	2	0		mosquitos e supervejos
7286	2007-03-02	Manuel Francisco	Juvencio Afonso	1	3	0	0	poco	poco	0	1	2	2	10	2	2	450	300	posto de s. magumbo	1	2	2	2	2	0		ha mosquito quando chove
7287	2007-03-02	Manuel Francisco	Raimunda Lucas	3	1	0	0	poco	poco	sim	1	1	2	10	2	2	500	250	posto de s. magumbo	1	2	2	2	2	0		mosquito e supervejos
7288	2007-02-18	Dercio Paulo	Luis Lucas	5	2	0	0	em casa	em casa	sim	1	1	2	4	4	2	600	300	posto de s. magumbo	1	1	1	2	2	0		mosquito e supervejos
7289	2007-02-18	Dercio Paulo	Maria Luis	5m	3	0	0	em casa	em casa	0	1	1	2	3,25	2	2	500	300	posto de s. magumbo	1	1	2	2	2	0		ha mosquito quando chove
7299	2007-02-14	Lourenco Felimone	Caetano Sebastiao	1	2	0	0	poco	poco	sim	1	1	3	3	4	canico	700	350	posto de s. magumbo	1	1	2	2	2	0
7300	2007-02-12	Marden Pereira	Paulino Banguela	50	2	0	0	poco	poco	sim	1	1	3	17	4	4	950	700	posto de s. magumbo	1	1	2	2	2	0		as janelas sao feitas de macute e que tem grandes folgas de 5cm por onde os mosquitos passam.
7301	2007-02-12	Marden Pereira	Pascoal Mabalane	3	2	0	0	poco	poco	sim	1	1	3	5	4	4	800	400	posto de s. magumbo	1	2	1	2	2	0		so tem mosquitos
7302	2007-02-12	Marden Pereira	Anibal Paulino	18	3	0	0	poco	poco	0	1	1	3	4,7	4	canico	710	315	posto de s. magumbo	1	1	2	2	2	1		so tem mosquitos
7303	2007-02-12	Marden Pereira	Laura Anibal	18	7	0	0	poco	poco	sim	2	3	2	13,3	4	canico	420	370	posto de s. magumbo	1	2	2	2	2	0		so tem mosquitos
7304	2007-02-12	Marden Pereira	Carlos Ricardo	5	3	0	0	poco	poco	sim	1	1	3	5	4	4	860	340	posto de s. magumbo	1	1	1	2	1	1		so tem mosquitos
7305	2007-02-12	Marden Pereira	Nelia Carlos	5	2	0	0	poco	poco	0	1	1	2	15	canico	canico	550	300	posto de s. magumbo	1	2	2	2	2	0		so tem mosquitos
7306	2007-02-12	Marden Pereira	Dercio Carlos	2m	1	0	0	poco	poco	0	1	1	2	7,9	caixas	2	300	209	posto de s. magumbo	1	2	2	2	2	0		so tem mosquitos
7307	2007-02-12	Marden Pereira	Juvenalda Felizarda	8	2	0	0	poco	poco	0	1	1	2	20	2	2	600	304	posto de s. magumbo	1	2	2	2	2	0		so tem mosquitos
7308	2007-02-12	Marden Pereira	Laura Banguela	mais de 50	1	0	0	poco	poco	sim	1	1	2	21,3	2	2	507	300	posto de s. magumbo	2	1	2	2	2	0		so tem mosquitos
7309	2007-02-12	Marden Pereira	Natalia Herinque	6	3	0	0	poco	poco	0	1	1	2	23	2	2 e canico	450	280	posto de s. magumbo	1	1	2	2	2	0		so tem mosquitos
7310	2007-02-12	Marden Pereira	Sandra Alberto	2	1	0	0	poco	poco	0	1	1	2	19,1	2	2	430	270	posto de s. magumbo	1	2	2	2	2	0		so tem mosquitos
7311	2007-02-12	Marden Pereira	Felizarda Ricardo	2m	1	0	0	poco	poco	0	1	1	2	3	canico	2	470	280	posto de s. magumbo	1	2	2	2	2	0		so tem mosquitos
7312	2007-02-12	Marden Pereira	Olga Ricardo	15	2	0	0	poco	poco	sim	1	1	3	3,4	4	4	735	360	posto de s. magumbo	1	1	2	2	2	0		as janelas temredes com abertura de 7cm por onde os mosquitos passam.
7313	2007-02-12	Marden Pereira	Guilhermina Joao	13	4	0	0	poco	poco	0	4	4	2	16	4	2	500	340	posto de s. magumbo	1	2	2	2	2	0		so tem mosquitos
7315	2007-05-19	Manuel Francisco	Filipe Francisco	7m	1	0	0	poco	poco	0	1	1	2	10	2	2	350	150	posto de s. magumbo	1	2	2	2	2	0		tem supervejos so
7316	2007-05-19	Manuel Francisco	Erciodio Regina	7m	1	0	0	poco	poco	0	1	1	2	10	2	2	350	200	posto de s. magumbo	1	2	2	2	2	0		tem supervejos so
7317	2007-02-13	Marden Pereira	Jose Jacinto	5	2	0	0	poco	poco	sim	1	1	2	9	4	canico	600	570	posto de s. magumbo	1	1	1	2	2	0		so tem mosquitos
7321	2007-05-19	Manuel Francisco	Albertina Jose	1,6m	1	0	0	poco	poco	sim	1	1	2	10	2	canico	500	250	posto de s. magumbo	1	2	2	2	2	0		tem supervejos so
7322	2007-05-15	Manuel Francisco	Paulo Antonio	2	1	0	0	poco	poco	0	1	1	2	15	2	2	300	200		1	2	2	2	2	0		tem supervejos so
7323	2007-05-19	Manuel Francisco	Mario Antonio	5	1	0	0	poco	poco	0	1	1	2	15	canico	canico	500	250	posto de s. magumbo	1	2	2	2	2	0		tem supervejos so
7324	2007-05-19	Manuel Francisco	Sergio Francisco	3	3	0	0	poco	poco	sim	1	2	2	15			450	200	posto de s. magumbo	1	1	2	2	2	0		tem supervejos so
7325	2007-02-12	Marden Pereira	Antonio Manuel	2	5	0	0	poco	poco	sim	2	3	2	22,5	4	canico	608	371	posto de s. magumbo	1	1	2	2	2	0		tem mosquitos de mais em relacao aos supervejos
7326	2007-05-19	Manuel Francisco	Luisa Mbata	5	1	0	0	poco	poco	0	1	1	2	10	2	2	350	200	posto de s. magumbo	1	2	2	2	2	0		tem supervejos so
7328	2007-05-09	Manuel Francisco	Jose Paulo	2	4	0	0	poco	poco	sim	1	1	2	2.5	4	2	500	300	posto de s. magumbo	1	2	2	2	2	0		tem supervejos so
7329	2007-05-19	Manuel Francisco	Antonio Paulo	3	3	0	0	poco	poco	sim	1	2	3	4	4	4	700	600	posto de s. magumbo	1	1	2	2	2	0		tem supervejos so
7330	2007-05-19	Manuel Francisco	Joana David	2	2	0	0	poco	poco	sim	1	1	2	10	4	2	500	250	posto de s. magumbo	1	2	2	2	2	0		tem supervejos so
7331	2007-05-19	Manuel Francisco	Maria Jose Luis	5m	1	0	0	poco	poco	sim	1	1	2	5	2	2	400	200	posto de s. magumbo	1	2	2	2	2	0		tem supervejos so
7334	2007-05-19	Manuel Francisco	Xavier Nguila	29	2	0	0	poco	poco	0	3	3	3	4	4	4	800	700	posto de s. magumbo	1	1	2	2	2	0		tem supervejos so
7335	2007-05-19	Manuel Francisco	Elidio Rofino	5m	1	0	0	poco	poco	0	1	1	2	9	2	canico	400	250	posto de s. magumbo	1	2	2	2	2	0		tem supervejos so
7336	2007-05-19	Manuel Francisco	Lucrencia Zildo	1	4	0	0	poco	poco	sim	1	1	2	15	2	canico	600	300	posto de s. magumbo	1	2	2	2	2	0		tem supervejos so
7337	2007-05-19	Manuel Francisco	Zildo Xavier	3	1	0	0	poco	poco	sim	1	1	2	10	4	2	600	300	posto de s. magumbo	1	1	2	2	2	1		tem supervejos so
7338	2007-05-19	Manuel Francisco	Etelevino Zidro	1	1	0	0	poco	poco	0	1	1	2	15	2	2	300	200	posto de s. magumbo	1	2	2	2	2	0		tem supervejos so
7341	2007-05-19	Manuel Francisco	Dulce Constantino	2	2	0	0	poco	poco	0	1	1	2	10	4	canico	500	3000	posto de s. magumbo	1	1	2	2	2	0		tem supervejos so
7342	2007-02-13	Lourenco Felimone	Valdimiro Antonio	1	3	0	0	poco	poco	sim	1	1	2	5	canico	canico	500	320	posto de s. magumbo	1	2	2	2	2	0
7343	2007-02-13	Lourenco Felimone	Francisco Antonio	1	2	0	0	poco	poco	sim	1	1	2	8	4	2	450	250	posto de s. magumbo	1	2	1	2	2	0
7344	2007-02-13	Lourenco Felimone	Amelia Ricardo	1	1	0	1	poco	poco	sim	1	1	2	5	2	2	400	280	posto de s. magumbo	1	2	2	2	2	0
7345	2007-02-13	Lourenco Felimone	Dulce Antonio		2	0	0	poco	poco	0	1	1	2	7	caixas	2	400	300	posto de s. magumbo	1	2	2	2	2	0		a porta tem uma abertura de uns 0,5cm
7347	2007-02-12	Marden Pereira	Delcia Pascoal	3	3	0	0	poco	poco	0	1	1	2	15	canico	canico	450	275	posto de s. magumbo	1	2	2	2	2	0		so tem mosquitos
7348	2007-02-13	Marden Pereira	Sergio Xavier	5	3	0	0	poco	poco	sim	2	2	2	15	4	canico	600	300	posto de s. magumbo	1	2	2	2	2	0		so tem mosquitos
7349	2007-02-12	Marden Pereira	Claudio Sergio	5	2	0	0	poco	poco	sim	1	1	2	18,9	2	2	400	230	posto de s. magumbo	1	2	2	2	2	0		so tem mosquitos
7350	2007-02-12	Marden Pereira	Esmeraldo Sergio	5	1	0	0	poco	poco	0	1	1	2	10,7	2	2 e canico	400	230	posto de s. magumbo	1	2	2	2	2	0		so tem mosquitos
7351	2007-02-12	Marden Pereira	Helena Nguila	11	1	0	0	poco	poco	0	1	1	2	30	2	2	450	385	posto de s. magumbo	1	2	2	2	2	0		so tem mosquitos
7352	2007-02-12	Marden Pereira	Izidro Xavier	16	3	0	0	poco	poco	sim	1	1	2	11	4	canico	650	300	posto de s. magumbo	1	1	2	2	2	1		so tem mosquitos
7353	2007-02-10	Marden Pereira	Benedita Izidro	5	5	0	0	poco	poco	0	2	2					500	300	posto de s. magumbo	1	2	2	2	2	0		tem mosquitos de mais em relacao aos supervejos
7354	2007-02-14	Dercio Paulo	Marta Lucas	7d	2	0	0	no vizinho	no vizinho	0	1	1	2	5	2	2	600	400	posto de s. magumbo	1	2	2	2	2	0		o canico tem furos; tambem tem mosquitos e supervejos
7355	2007-02-14	Dercio Paulo	Julia Fernando	1m	2	0	0	no vizinho	no vizinho	sim	1	1	2	3	2	2	400	290		1	2	2	2	2	0		tem furos no telhado; tambem tem mosquitos e supervejos
7361	2007-02-13	Marden Pereira	Iolanda da Silva	1d	2	0	0	poco	poco	0	1	1	2	12	3	2	365	360	posto de s. magumbo	1	1	2	2	2	0		Na parede frontal existe um espelho colocado verticalmente
7363	2007-02-14	Dercio Paulo	Antonio Alberto	18	2	0	0	em casa	em casa	sim	1	1	3	3	4	4	800	400	posto de s. magumbo	1	1	1	2	1	0		uns supervejos
7364	2007-02-14	Manuel Francisco	Alcidio Antonio	15	1	0	0	poco	poco	0	1	1	3	0	4	canico	550	300	posto de s. magumbo	1	2	2	2	2	0	S23,42,663 e E035,24,447	supervejos so
7365	2007-02-14	Manuel Francisco	Carlota Rungo	32	5	0	0	poco	poco	0	1	1	3	3	4	4	600	600	posto de s. magumbo	1	2	2	2	2	0	S23,42,597 e E035,24,472	supervejos so
7366	2007-02-14	Dercio Paulo	Manuel Alberto	15	1	0	0	em casa	em casa	0	1	1	2	9	4	canico	500	300	posto de s. magumbo	1	1	1	2	1	0	S23,42,583 e E035,24,474	tem mosquitos e supervejos
7367	2007-02-14	Dercio Paulo	Isabel Mbata	1	1	0	0	em casa	em casa	0	1	1	2	5	canico	2	400	290	posto de s. magumbo	1	2	2	2	2	0		tem mosquitos e supervejos
7368	2007-02-14	Manuel Francisco	Osvaldo Antonio	3	1	0	0	poco	poco	0	1	1	2	5	4	2	450	250	posto de s. magumbo	1	2	2	2	2	0	S23,42,560 e E035,24,462	supervejos so
7369	2007-02-14	Dercio Paulo	Aderco da Jozina	2	1	0	0	em casa	em casa	0	1	1	2	4	caixas	2	330	230	posto de s. magumbo	1	1	2	2	2	0	S23,44`,224" e 035,24`,052"	tem mosquitos e supervejos
7370	2007-02-14	Manuel Francisco	Jubilio Felix	6	2	0	0	poco	poco	0	1	1	2	4	canico	2	320	230		1	2	2	2	2	0	S23,42`,567" e 035,24`,452"	supervejos so
7371	2007-02-14	Manuel Francisco	Emidio Antonio	5m	2	0	0	poco	poco	0	1	1	2	10			300	180	posto de s. magumbo	1	2	2	2	2	0	S23,42`,571" e 035,24`,449"	supervejos so
7373	2007-02-14	Dercio Paulo	Luisa Jose	40	5	0	0	em casa	em casa	sim	2	2	3	3	4	4	800	700	posto de s. magumbo	1	2	2	2	2	0	S23,42`,724" e 035,24`,653"	as janelas tem furos e tambem tem mosquitos e supervejos
7374	2007-02-14	Manuel Francisco	Dulce Gabriel	8	2	0	0	poco	poco	sim	1	1	1	10	4	canico	500	250	posto de s. magumbo	1	1	1	2	2	0
7375	2007-02-14	Dercio Paulo	Herculano Antonio	34	3	0	0	em casa	em casa	sim	1	1	4	4	4	4	700	400	posto de s. magumbo	1	1	2	2	1	0		as redes das janelas tem furos e tambem tem mosquitos e supervejos
7376	2007-02-14	Manuel Francisco	Sonia Herculano		2	0	0	poco	poco	0	1	1	2	10	2	2	440	300	posto de s. magumbo
7377	2007-02-14	Dercio Paulo	Florentina Jordao	2	3	0	0	no vizinho	no vizinho	0	1	1	2	5	canico	2	500	290	posto de s. magumbo	1	2	2	2	2	0		poucos burracos e tambem tem mosquitos e supervejos
7378	2007-02-14	Manuel Francisco	Germana Abrantes	9m	1	0	0	poco	poco	sim	1	1	2	7	2	2	500	300	posto de s. magumbo	1	1	2	2	2	0
7379	2007-02-14	Dercio Paulo	Caetano Massirela	30	2	0	0	em casa	em casa	sim	1	1	3	5			900	800	posto de s. magumbo	1	1	2	2	2	0		as janelas tem furos e tambem tem mosquitos e supervejos
7380	2007-02-14	Manuel Francisco	Ivone Caetano	4m	3	0	0	poco	poco	0	1	1	2	15	2	2	400	300	posto de s. magumbo	1	2	2	2	2	0
7387	2007-02-14	Dercio Paulo	Tunelca Sumalgi	6m	1	0	0	no vizinho	no vizinho	0	1	1	2	6.9	2	2	450	300	posto de s. magumbo	1	2	2	2	2	0		a porta tem furos e tambem tem mosquitos e supervejos
7400	2007-02-13	Lourenco Felimone	Herculano Antonio		3	0	0	poco	poco	sim	2	2	3	3	4	4	550	340		1	1	2	2	2			As janelas e a porta de traz sao feitas de macute, permitindo assim a entrada de mosquitos.
7401	2007-02-13	Lourenco Felimone	Castro Herculano	1 ano	1	0	0	poco	poco	0	1	1	2	3	2	2	400	200		1	2	2	2	2	0
7402	2007-02-13	Lourenco Felimone	Egenio Herculano	1 ano	2	0	0	poco	poco	0	1	1	3	1	4	canico	600	350	posto de s. magumbo	1	2		2	2	0
7403	2007-02-13	Marden Pereira	Alberto Pedro	2 anos	3	0	0	poco	poco	0	1	1	2	13,4	2	2	600	300	posto de s. magumbo	1	1	2	2	2	0		o que ha demais sao mosquitos e um pouco de supervejos.
7404	2007-02-13	Marden Pereira	Tereza Alberto	22 anos	3	0	0	poco	poco	sim	2	2	2	10,5	2	2	350	230	posto de s. magumbo	1	2	2	2	2	0		o que ha demais sao mosquitos e um pouco de supervejos.
7405	2007-02-13	Marden Pereira	Ermelinda Pedro		2	0	0	poco	poco	sim	1	1	2	15,7	canico	2 e canico	500	300	posto de s. magumbo	1	2	2	2	2	0		o que ha demais sao mosquitos e um pouco de supervejos.
7406	2007-02-13	Marden Pereira	Ermelinda Antinio	42 anos	2	0	0	poco	poco	sim	1	1	2	18,6	2	2	540	230	posto de s. magumbo	1	2	2	2	2	0		o que ha demais sao mosquitos e um pouco de supervejos.
7407	2007-02-13	Marden Pereira	Fernando Cuamba	42 anos	2	0	0	poco	poco	sim	1	1	3	5	4	4	800	700	posto de s. magumbo	1	1	1	2	2	0		o que ha demais sao mosquitos e um pouco de supervejos que aparecem de vezes enquanto
7408	2007-02-13	Marden Pereira	Joao Elias Bambo	60 anos	2	0	0	poco	poco	sim	1	1	2	17,7	4	canico	500	300	posto de s. magumbo	1	1	2	2	2	0		o que ha demais sao mosquitos e um pouco de supervejos.
7409	2007-03-01	Manuel Francisco	Ricardo Elias	2	2	0	0	poco	poco	sim	1	1	2	5	4	canico	650	300	posto de s. magumbo	1	2	2	2	2	0		ha mosquito quando chove
7410	2007-02-17	Manuel Francisco	Feleciano Antonio		2	0	0	poco	poco	sim	1	1	2	10	4	2	500	300	posto de s. magumbo	1	2	2	2	2	0		e sempre supervejos
7411	2007-02-17	Manuel Francisco	Eulidio Fernando	5	5	0	0	poco	poco	sim	1	1	2	15	3	2	550	300	posto de s. magumbo	1	1	1	2	2	0		e sempre supervejos
7412	2007-02-17	Manuel Francisco	Fendo Jose	4	1	0	0	poco	poco	0	1	1	2	19	3	2	400	250	posto de s. magumbo	1	1	1	2	2	0		e sempre supervejos
7413	2007-02-17	Manuel Francisco	Juliao Joao	2	4	0	0	poco	poco	sim	1	1	2	7	4	2	450	300	posto de s. magumbo	1	1	2	2	2	0		e sempre supervejos
7415	2007-02-17	Dercio Paulo	Suzete Elias	3	3	0	0	em casa	em casa	sim	1	2	3	3	4	canico	700	400	posto de s. magumbo	1	1	2	2	2	0		mosquitos e supervejos
7416	2007-02-17	Dercio Paulo	Ana Ngure	30	1	0	0	no vizinho	no vizinho	sim	1	1	3	5	4	canico	500	400	posto de s. magumbo	1	1	2	2	2	0		mosquito e supervejos
7417	2007-02-17	Dercio Paulo	Ivone Manuel	3	1	0	0	no vizinho	no vizinho	0	1	1	2	4	2	2	350	280	posto de s. magumbo	1	2	2	2	2	0		mosquito e supervejos
7418	2007-02-21	Dercio Paulo	Jose Bonito	5	1	0	0	no vizinho	no vizinho	0	1	1	2	6	4	2	400	290	posto de s. magumbo	1	1	2	2	2	0		sempre ha mosquito
7420	2007-02-21	Dercio Paulo	Nuro Abessoal	5	1	0	0	no vizinho	no vizinho	0	1	1	2	6	2	2	400	290	posto de s. magumbo	1	2	1	2	2	0		sempre ha mosquito
7421	2007-02-21	Dercio Paulo	Pascoal Emidio	5m	1	0	0	no vizinho	no vizinho	0	1	1	2	3	2	2	400	280	posto de s. magumbo	1	2	2	2	2	0		sempre ha mosquito
7422	2007-02-21	Dercio Paulo	Elton Emidio	9m	3	0	0	no vizinho	no vizinho	0	1	1	2	6	4	canico	500	300	posto de s. magumbo	1	2	2	2	2	0		mosquito e supervejos
7423	2007-02-21	Dercio Paulo	Emidio Felisberto	17	2	0	0	no vizinho	no vizinho	sim	1	1	2	4	4	canico	500	300	posto de s. magumbo	1	2	2	2	2	0		sempre ha mosquito
7424	2007-02-18	Dercio Paulo	Dercio Paulo	5	1	0	0	no vizinho	no vizinho	sim	1	1	2	4	3	2	480	290	posto de s. magumbo	1	1	2	2	2	1		mosquito e supervejos
7425	2007-02-17	Dercio Paulo	Rodrigues Luis	1	3	0	0	no vizinho	no vizinho	sim	1	1	2	4,55	4	canico	500	400	posto de s. magumbo	1	1	1	2	2	0		burracos grandes, mosquitos e supervejos
7426	2007-02-17	Dercio Paulo	Neia Rodrigues	7m	1	0	0	no vizinho	no vizinho	sim	2	2	2	0,25	4	canico	600	400	posto de s. magumbo	1	1	2	2	2	0		mosquito e supervejos
7427	2007-02-18	Dercio Paulo	Luis Manguaula	24	2	0	0	no vizinho	no vizinho	sim	1	1	2	6	4	2	500	300	posto de s. magumbo	1	2	2	2	1	0		mosquito e supervejos
7428	2007-02-18	Dercio Paulo	Paulino Luis	3	2	0	0	no vizinho	no vizinho	sim	2	2	2	4	4	2	400	280	posto de s. magumbo	1	1	2	2	2	0		ha mosquito quando chove
7429	2007-02-21	Dercio Paulo	Luis Manguaula	36	2	0	0	em casa	em casa	sim	1	1	3	9	4	4	600	400	posto de s. magumbo	1	1	2	2	1	0		furos no telhado e tem tambem mosquitos e supervejos.
7430	2007-02-21	Dercio Paulo	Alberto Pedro	4	2	0	0	em casa	em casa	sim	2	2	3	9,35	4	4	450	400	posto de s. magumbo	1	1	2	2	2	0		tem buracos capaz de entrarem mosquitos e tem tambem mosquitos e supervejos.
7431	2007-02-19	Dercio Paulo	Humberto Luis	10	5	0	0	poco caseira	poco caseira	sim	1	2	2	6	4	2	500	300	posto de s. magumbo	1	1	1	2	1	0		mosquito e supervejos
7432	2007-02-19	Dercio Paulo	Felizarda Humberto	1	1	0	0	em casa	em casa	0	1	1	2	6	4	2	500	300	posto de s. magumbo	1	2	1	2	2	0		mosquito e supervejos
7435	2007-02-17	Dercio Paulo	Galvao Armando	15	3	0	0	no vizinho	no vizinho	sim	1	2	2	6	3	2	500	400	posto de s. magumbo	1	2	2	2	2	0		mosquito e supervejos
7436	2007-02-17	Dercio Paulo	Galvao Armando	15	4	0	0	no vizinho	no vizinho	sim	1	2	1	4	4		500	400	posto de s. magumbo	1	1	2	2	2	0		mosquito e supervejos
7437	2007-02-17	Dercio Paulo	Valdimiro Galvao	1	2	0	0	no vizinho	no vizinho	0	1	2	2	6	2	2	400	280	posto de s. magumbo	1	2	2	2	2	0		mosquito e supervejos
7439	2007-02-19	Dercio Paulo	Carlos Botao		2	0	0	em casa	em casa	sim	3	1	3	2,5	4	4	800	700	posto de s. magumbo	1	1	1	2	2	0		ha mosquito quando chove
7440	2007-02-19	Dercio Paulo	Pedro Augusto	4	1	0	0	em casa	em casa	sim	1	1	2	4	2	2	300	240	posto de s. magumbo	1	1	2	2	2	0		mosquito e supervejos
7441	2007-02-19	Dercio Paulo	Eva Naene	3	1	0	0	em casa	em casa	sim	1	1	3	6	4	4	700	300	posto de s. magumbo	1	1	2	2	2	0		mosquito e supervejos
7442	2007-05-30	Dercio Paulo	Domingos Joao	1	1	0	0	no vizinho	no vizinho	sim	1	1	2	6	4	2	440	280	posto de s. magumbo	1	1	1	2	2	0		ha mosquitos quando chove e tambem tem supervejos
7449	2007-05-30	Dercio Paulo	Maria Jorge	3	2	0	0	no vizinho	no vizinho	sim	2	2	2	6	4	2	450	290	posto de s. magumbo	1	1	2	2	2	0		mosquitos e supervejos
7450	2007-03-01	Manuel Francisco	Lino Pedro	7	1	0		poco	poco	0	3	1	3	0	4	4	900	800	posto de s. magumbo	1	2	2	2	2	0		ha mosquito quando chove
7540	2007-05-29	Dercio Paulo	Domingos Jorge	6	1	0	sim	em casa	em casa	sim	2	2	1	6	4	canico	600	320	posto de s. magumbo	1	1	1	2	2	0		mosquitos e supervejos
7451	2007-02-13	Manuel Francisco	Joao Manuel	3 anos	1	0	0	poco	poco	0	1	1	2	15	4	2	500	300	posto de s. magumbo	1	2	2	2	2	0
7452	2007-02-13	Manuel Francisco	Avelino Joao	7 meses	1	0	0	poco	poco	0	1	1	2	7,5	caixas	2	350	200	posto de s. magumbo	1	2	2	2	2	0
7452	2007-05-29	Dercio Paulo	Luis Domingos	11	1	0	0	em casa	em casa	sim	1	1	2	9	4	canico	600	300	posto de s. magumbo	1	1	2	2	2	1		mosquitos e supervejos
7453	2007-02-13	Manuel Francisco	Guilherme Joao	4 meses	1	0	0	poco	poco	0	1	1	2	7	2	2	200	150		1	2	2	2	2	0
7453	2007-05-29	Dercio Paulo	Jorge Luis	7	2	0	0	em casa	em casa	sim	2	2	2	6	4	2	400	280	posto de s. magumbo	1	2	2	2	2	0		mosquitos e supervejos
7454	2007-02-13	Manuel Francisco	Manuel Jorge	2 anos	1	0	0	poco	poco	0	1	1	2	20	2	2	200	150		1	2	2	2	2	0
7455	2007-02-13	Manuel Francisco	Domingos Joege	1 mes	1	0	0	poco	poco	0	1	1		4	canico	2	350	250	posto de s. magumbo	1	2	2	2	2	0
7456	2007-02-13	Manuel Francisco	Jorge Manuel	29 anos	3	0	0	poco	poco	sim	1	1	3	20	4	2	500	300		2	2	2	2	2	0
7457	2007-02-13	Manuel Francisco	Guilherme Manuel	8 anos	2	0	0	poco	poco	sim	1	1	2	10	4	canico	600	300	morrumbene	1	1	2	2	2	0
7458	2007-02-13	Manuel Francisco	Francisco Tinga	10 anos	2	0	0	poco	poco	sim	1	1	2	10	3	canico	250	700??	posto de s. magumbo	1	1	2	2	2	0		supervejos
7459	2007-02-13	Manuel Francisco	Paulino Francisco	1 ano	1	0	0	poco	poco	0	1	1	2	11	2	2	200?	300?	posto de s. magumbo	1	2	2	2	2	0		supervejos
7460	2007-02-13	Manuel Francisco	Alberto Francisco	2 anos	1	0	0	poco	poco	0	1	1	2	7,5	2	2	400	300	posto de s. magumbo	1	2	2	2	2	0		supervejos
7461	2007-02-13	Manuel Francisco	Manuel Francisco	2 anos	1	0	0	poco	poco	0	1	1	2	5	3	2	300?	400?	posto de s. magumbo	1	2	2	2	2	0		supervejos
7462	2007-02-13	Manuel Francisco	Armando Francisco	1 ano	3	0	0	poco	poco	sim	1	2			1	canico	500	250	posto de s. magumbo	1	2	1	2	2	0
7463	2007-02-20	Manuel Francisco	Ana Rafael	1	3	0	0	poco	poco	sim	1	2	3	10	4	canico	600	250	posto de s. magumbo	1	2	1	2	2	0		e sempre supervejos
7464	2007-02-20	Manuel Francisco	Albertina Felizberto	9m	3	0	0	poco	poco	0	1	1	2	15	canico	2	400	200	posto de s. magumbo	1	2	2	2	2	0		e sempre supervejos
7465	2007-02-19	Manuel Francisco	Joana Daniel	7	2	0	0	poco	poco	sim	1	1	3	10	4	canico	600	300	posto de s. magumbo	1	1	1	2	2	0		e sempre supervejos
7466	2007-02-19	Manuel Francisco	Mileniu Ernesto	4m	2	0	0	poco	poco	0	1	1	1	10	4	canico	500	250	posto de s. magumbo	1	2	2	2	2	0		e sempre supervejos
7467	2007-02-19	Manuel Francisco	Ernesto Antonio	40	2	0	0	poco	poco	sim	1	1	3	4	4	4	800	500	posto de s. magumbo	1	1	2	2	2	0		e sempre supervejos
7468	2007-02-19	Manuel Francisco	Celso Ernesto	2	1	0	0	poco	poco	0	1	1	2	10	2	2	250	150	posto de s. magumbo	1	2	2	2	2	0		e sempre supervejos
7469	2007-02-19	Manuel Francisco	Luis Fernando	10	2*	0	0*	poco	poco	sim	1	1	2	10	4	canico	600	300	posto de s. magumbo	1	1	1		2	0		e sempre supervejos
7470	2007-03-01	Manuel Francisco	Sergio Fernando	1	5	0	0	poco	poco	sim	1	2	3	0,5	4	canico	800	300	posto de s. magumbo	1	2	2	2	2	0		a mosquito sempre
7471	2007-03-01	Manuel Francisco	Isabel Jose	5	1	0	0	poco	poco	sim	1	1	2	5	2	2	400	250	posto de s. magumbo	1	2	2	2	2	0		ha mosquito quando chove
7472	2007-03-01	Manuel Francisco	Lucia Fernando	1,5	2	0	0	poco	poco	0	1	2	2	5	canico	2	400	250	posto de s. magumbo	1	1	2	2	2	0		a mosquito sempre
7473	2007-03-01	Manuel Francisco	Agostinho Saete	1m	6	0	0	poco	poco	sim	1	3	3	0,5	4	canico	600	300	posto de s. magumbo	1	2	2	2	2	0		a mosquito sempre
7474	2007-03-01	Manuel Francisco	Manuel Antonio	9	6	0	0	poco	poco	sim	1	4	2	10	4	canico	600	350	posto de s. magumbo	1	1	2	2	2	0		ha mosquito quando chove
7480	2007-02-21	Manuel Francisco	Nelson Pedro	24	1	0	0	poco	poco	0	4	4	3	0	4	4	1000	900	posto de s. magumbo	1	2	2	2	2	0		e sempre supervejos
7481	2007-02-21	Manuel Francisco	Fernando Pedro	1m	1	0	0	poco	poco	0	1	1	2	10	3	2	300	150	posto de s. magumbo	1	2	2	2	2	0		e sempre supervejos
7482	2007-02-21	Manuel Francisco	Augusta Manuel	3	1	0	0	poco	poco	sim	1	1	3	2	4	canico	400	233	posto de s. magumbo	1	1	2	2	2	0		e sempre supervejos
7483	2007-02-21	Manuel Francisco	Albertina Manuel	3m	1	0	0	poco	poco	0	1	1	2	5	2	2	300	150	posto de s. magumbo	1	2	2	2	2	0		e sempre supervejos
7484	2007-02-21	Manuel Francisco	Isabel Rungo	4	1	0	0	poco	poco	sim	1	1	3	2	4	canico	500	300	posto de s. magumbo	1	1	2	2	2	0		e sempre supervejos
7485	2007-02-21	Manuel Francisco	Augusto Fortunato	1	3	0	0	poco	poco	sim	1	1	2	15	4	canico	450	250	posto de s. magumbo	1	1	2	2	2	0		e sempre supervejos
7487	2007-02-21	Manuel Francisco	Ugoma Alberto	50	1	0	0	poco	poco	0	1	1	3	0	4	4	600	350	posto de s. magumbo	1	2	2	2	2	0		e sempre supervejos
7488	2007-02-18	Manuel Francisco	Irene Ricardo	2	4	0	0	poco	poco	0	1	1	2	10	2	2	300	200	posto de s. magumbo	1	2	2	2	2	0		e sempre supervejos
7489	2007-02-18	Manuel Francisco	Ricardo Jose	4	2*	0	0*	poco	poco	sim	1	1	2	4	4	canico	600	300	posto de s. magumbo	1	2	2	2	2	0		e sempre supervejos
7490	2007-02-19	Manuel Francisco	Maria Mareledze	40	1	0	0	poco	poco	sim	1	1	3	18	4	canico	650	450	posto de s. magumbo	1	2	2	2	2	0		e sempre supervejos
7491	2007-02-19	Manuel Francisco	Rosa Victorino	1	1*	0	0*	poco	poco	0	1	1	2	17	3	2	450	250	posto de s. magumbo	1	2	2	2	2	0		e sempre supervejos
7492	2007-02-19	Manuel Francisco	Luis Miguel	8	4	0	0	poco	poco	sim	2	3	3	2	4	4	800	400	posto de s. magumbo	1	1	1	2	2	0		e sempre supervejos
7493	2007-02-17	Manuel Francisco	Rui Avelino	2	2	0	0	poco	poco	sim	1	1	1	5	4	canico	600	300	posto de s. magumbo	1	1	2	1	1	0		e sempre supervejos
7494	2007-02-17	Manuel Francisco	Florentina Ricardo	2	1	0	0	poco	poco	0	1	1	1	17	4	canico	600	300	posto de s. magumbo	1	1	1	2	1	0		e sempre supervejos
7495	2007-02-17	Manuel Francisco	Josefa Pauluno	4	1	0	0	poco	poco	0	1	1	2	15	4	2	500	250	posto de s. magumbo	1	2	2	2	2	0		e sempre supervejos
7496	2007-02-17	Manuel Francisco	Ilda Rui	3	2	0	0	poco	poco	0	1	1	2	15	4	2	500	250	posto de s. magumbo	1	2	2	2	2	0		e sempre supervejos
7497	2007-02-17	Manuel Francisco	Crimildo Rui	7m	1	0	0	poco	poco	0	1	1	2	25	2	2	300	200	posto de s. magumbo	1	1	2	2	2	0		e sempre supervejos
7498	2007-02-17	Manuel Francisco	Otavio Rui	7m	1	0	0	poco	poco	0	1	1	2	12	2	2	300	200	posto de s. magumbo	1	2	2	2	2	0		e sempre supervejos
7499	2007-02-17	Manuel Francisco	Maria Manuel	2	1	0	0	poco	poco	sim	1	1	2	10	2	2	400	200	posto de s. magumbo	1	1	2	2	2	0		e sempre supervejos
7500	2007-02-17	Marden Pereira	Viriato Texeira	25	1	0	0	poco	poco	0	1	1	2	5	zinco	2	400	255	posto de s. magumbo	1	2	2	2	2	0		o mosquito e que esta a menos em relacao aos supervejos
7506	2007-02-11	Manuel Francisco	Filipe Wiliamo	2m	4	0	0	poco	poco	sim	1	2	2	7	4	canico	500	300	posto de s. magumbo	1	2	2	2	2	0
7560	2007-02-21	Dercio Paulo	Marta Sebastiao	2	2	0	0	no vizinho	no vizinho	sim	2	1	2	6	2	canico	500	300	posto de s. magumbo	1	1	2	2	2	0		so mosquitos
7586	2007-02-21	Manuel Francisco	Joaquina Fortunato	2	1	0	0	poco	poco	0	1	1	2	15	4	2	500	250	posto de s. magumbo	1	2	2	2	2	0		e sempre supervejos
7600	2007-02-17	Manuel Francisco	Marta Manuel	1m	1	0	0	poco	poco	0	1	1	2	15	2	2	400	250	posto de s. magumbo	1	1	2	2	2	0		e sempre supervejos
7601	2007-02-18	Manuel Francisco	Beatriz Sarmento	3	1	0	0	poco	poco	0	1	1	2	10	4	2	500	250	posto de s. magumbo	1	2	2	2	2	0		e sempre supervejos
7602	2007-02-18	Manuel Francisco	Manuel Sarmento	37	2	0	0	poco	poco	sim	3	3	3		4	4	800	700	posto de s. magumbo	1	1	1	2	2	0		e sempre supervejos
7603	2007-02-18	Manuel Francisco	Joaquina Jonasse	40	1*	0	0*	poco	poco	0	3	2	3	5	4	4	800	500	posto de s. magumbo	1	2	2	2	2	0		e sempre supervejos
7604	2007-02-18	Manuel Francisco	Armando Mayendela	15	1	0	0	poco	poco	0	1	1	2	20	4	2	400	200	posto de s. magumbo	1	2	2	2	2	0		e sempre supervejos
7610	2007-02-21	Manuel Francisco	Filimone Foquisso	4	2	0	0	poco	poco	sim					2	2	500	350	posto de s. magumbo	1	1	2	2	2	0		folha incompleta e tem supervejos
7611	2007-02-21	Manuel Francisco	Anastancio Felimone	2s	1	0	0	poco	poco	sim	1	1	2	5	canico	2	300	200	posto de s. magumbo	1	1	2	2	2	0		e sempre supervejos
7612	2007-02-21	Manuel Francisco	Lucrencia Jeremias	2	2*	0	0*	poco	poco	0	1	1	2	0	2	2	400	350	posto de s. magumbo	1	2	2	2	2	0		e sempre supervejos
7613	2007-02-21	Manuel Francisco	Albertina Pauluno	5	1	0	0	poco	poco	0	1	1	3	5	4	canico	600	300	posto de s. magumbo	1	2	2	2	2	0		e sempre supervejos
7614	2007-02-21	Manuel Francisco	Armando Luciano	3	2*	0	0*	poco	poco	sim	1	1	2	10						1	1	2	2	2			Folha incompleta
7617	2007-03-01	Manuel Francisco	Fernando Nguila	2	1	0	0	poco	poco	0	1	1	2	10	4	2	400	350	posto de s. magumbo	1	1	2	2	2	0		mosquito e supervejos
7619	2007-03-01	Manuel Francisco	Carlos Armando	7m	4	0	0	poco	poco	0	1	1	2	10	2	2	500	300	posto de s. magumbo	1	2	2	2	2	0		mosquito e supervejos
7622	2007-03-01	Manuel Francisco	Xavier Antonio	1	3	0	0	poco	poco	0	2	2	2	10	2	2	400	200	posto de s. magumbo	1	2	2	2	2	0		ha mosquito quando chove
7623	2007-03-01	Manuel Francisco	Julieta Tinga	2s	1	0	0	poco	poco	0	1	1	2	10	4	2	400	250	posto de s. magumbo	1	2	2	2	2	0		ha mosquito quando chove
7624	2007-03-01	Manuel Francisco	Alfredo Madija	15	1	0	0	poco	poco	0	1	1	2	15	4	canico	500	300	posto de s. magumbo	1	2	2	2	2	0		mosquito e supervejos
7625	2007-03-01	Manuel Francisco	Pedro Duzento	2	2	0	0	poco	poco	sim	1	1	2	10	2	2	400	250	posto de s. magumbo	1	1	2	2	2	0		mosquito e supervejos
7626	2007-03-03	Manuel Francisco	Antonio Manuel	5	3	0	0	poco	poco	sim	1	1	2	5	4	canico	500	300	posto de s. magumbo	1	1	2	2	2	0		mosquito e supervejos
7627	2007-03-03	Manuel Francisco	Luisa Antonio	2	3	0	0	poco	poco	0	1	2	2	10	2	2	350	200	posto de s. magumbo	1	2	2	2	2	0		mosquito e supervejos
7628	2007-03-03	Manuel Francisco	Candida Alberto	4	1	0	0	poco	poco	sim	1	1	2	5	4	canico	500	300	posto de s. magumbo	1	2	2	2	2	0		ha mosquito quando chove
7629	2007-03-03	Manuel Francisco	Ana Fernando	7	2	0	0	poco	poco	sim	1	1	2	15	4	2	500	300	posto de s. magumbo	1	1	2	2	2	0		tem folgas na parede que podem entrar mosquitos e tambem ha mosquitos quando chove.
7630	2007-03-03	Manuel Francisco	Belarmina Manuel	2	2	0	0	poco	poco	sim	1	1	2	5	2	2	400	200	posto de s. magumbo	1	2	1	2	2	0		mosquito e supervejos
7631	2007-05-22	Manuel Francisco	Afonso Manuel	1	1	0	0	poco	poco	0	1	1	2	5	2	2	400	250	posto de s. magumbo	1	2	2	2	2	0		tem supervejos so
7632	2007-03-03	Manuel Francisco	Caetano Manuel	11	1	0	0	poco	poco	0	1	1	2	10	caixas	2	400	200	posto de s. magumbo	1	2	2	2	2	0		ha mosquito quando chove
7638	2007-03-03	Manuel Francisco	Joaquim Fernando	2m	2	0	0	poco	poco	sim	1	1	2	5	4	2	600	300	posto de s. magumbo	1	2	2	2	2	0		mosquito e supervejos
7639	2007-05-20	Manuel Francisco	Benedita Pascoal	1	3	0	0	poco	poco	0	1	2	2	10	4	canico	500	300	posto de s. magumbo	1	2	2	2	2	0		tem supervejos so
7640	2007-05-22	Dercio Paulo	Delefina Filipe	3	2	0	0	no vizinho	no vizinho	sim	1	1	2	15	4	2	480	280	posto de s. magumbo	1	1	2	2	2	1		mosquitos e supervejos
7641	2007-05-21	Dercio Paulo	Adelto Luis	1	1	0	0	no vizinho	no vizinho	sim	1		2	9	2	canico	500	290	posto de s. magumbo	1	2	2	2	2	0		mosquitos e supervejos
7642	2007-05-21	Dercio Paulo	Maria Pedro	5	2	0	0	em casa	em casa	sim	1	1	2	12	3	canico	500	300	posto de s. magumbo	1	1	2	2	1	1		tem supervejos so
7643	2007-05-21	Dercio Paulo	Jose Afonso	2	1	0	0	no vizinho	no vizinho	0	1	1	2	8	3	2	450	290	posto de s. magumbo	1	1	2	2	2	0		tem supervejos so
7644	2007-05-21	Dercio Paulo	Amelia Alberto	9m	1	0	0	em casa	em casa	0	1	1	2	9	2	2	400	270	posto de s. magumbo	1	2	2	2	2	1		so mosquitos
7645	2007-05-22	Manuel Francisco	Palmira Tchalo	2	4	0	0	poco	poco	sim	1	3	2	5	2	canico	400	200	posto de s. magumbo	1	1	2	2	2	0		tem supervejos so
7646	2007-05-22	Manuel Francisco	Argentina Jose	5m	2	0	0	poco	poco	sim	1	1	2	10	2	2	400	250	posto de s. magumbo	1	2	2	2	2	0		tem supervejos so
7648	2007-05-21	Manuel Francisco	Leonilde Manuel	2	1	0	0	poco	poco	0	1	1	2	10	2	2	350	250	posto de s. magumbo	1	2	2	2	2	0		tem supervejos so
7649	2007-05-21	Dercio Paulo	Rita Luis	1	1	0	0	em casa	em casa	sim	1	1	3	4	4	2	500	300	posto de s. magumbo	1	2	2	2	2	0		tem supervejos so
7650	2007-05-21	Manuel Francisco	Renaldo Luis	3	1	0	0	poco	poco	0	1	1	2	10	4	canico	500	350	posto de s. magumbo	1	1	2	2	2	1		tem supervejos so
7651	2007-05-21	Manuel Francisco	Joao Fernando	1	2	0	0	em casa	em casa	sim	1	1	3	2.5	4	canico	600	300	posto de s. magumbo	1	1	2	2	2	0		tem supervejos so
7661	2007-05-25	Dercio Paulo	Ernesto Jose	6	2	0	0	no vizinho	no vizinho	sim	1	1	2	6	4	2	600	300	posto de s. magumbo	1	1	2	2	2	0		mosquitos e supervejos
7662	2007-05-25	Dercio Paulo	Arnaldo Salomao	1	1	0	0	no vizinho	no vizinho	sim	1	1	2	7	2	2	400	270	posto de s. magumbo	1	2	2	2	2	0		mosquitos e supervejos
7663	2007-05-25	Dercio Paulo	Jose Vasco	3	2	0	0	no vizinho	no vizinho	sim	1	1	2	5	4	canico	500	295	posto de s. magumbo	1	2	2	2	2	0		mosquitos e supervejos
7670	2007-03-01	Manuel Francisco	Osvaldo Pedro	2	1	0	0	poco	poco	0	1	1	2	15	2	2	350	200	posto de s. magumbo	1	2	2	2	2	0		mosquito e supervejos
7671	2007-03-01	Manuel Francisco	Isabel Pedro	1	1	0	0	poco	poco	0	1	1	2	10	4	canico	400	250	posto de s. magumbo	1	2	2	2	2	0		mosquito e supervejos
7672	2007-03-11	Manuel Francisco	Menalda Jovito	1	1	0	0	poco	poco	0	1	1	2	7	2	canico	400	250	posto de s. magumbo	1	2	2	2	2	0		ha mosquito quando chove
7673	2007-03-01	Manuel Francisco	Jorge Jovito	1	1	0	0	poco	poco	0	1	1	2	9	2	canico	300	200	posto de s. magumbo	1	1	2	2	2	0		ha mosquito quando chove
7674	2007-03-01	Manuel Francisco	Suzana Alberto	2	2	0	0	poco	poco	0	1	1	2	0,5	2	canico	400	250	posto de s. magumbo	1	1	1	2	2	0		ha mosquito quando chove
7675	2007-03-01	Manuel Francisco	Paulo Manuel	7m	2	0	0	poco	poco	sim	1	1	2	7	2	2	350	200	posto de s. magumbo	1	2	2	2	2	0		sempre ha mosquito
7676	2007-03-01	Manuel Francisco	Angelo Armando	7	4	0	0	poco	poco	0	2	2	3	0	4	canico	1300	800	posto de s. magumbo	1	1	1	2	2	0		ha mosquito quando chove
7677	2007-03-03	Manuel Francisco	Manuel Joao	2	3	0	0	poco	poco	sim	1	1	2	15	4	canico	550	300	posto de s. magumbo	1	1	2	2	2	0		ha mosquito quando chove
7678	2007-03-03	Manuel Francisco	Mario Manuel	5m	2	0	0	poco	poco	0	1	1	2	10	2	2	400	250	posto de s. magumbo	1	2	2	2	2	0		mosquito e supervejos
7679	2007-03-03	Manuel Francisco	Bernardo Jossai		1	0	0	poco	poco	0	1	1	2	5	4	canico	700	300	posto de s. magumbo	1	2	2	2	2	0		e sempre supervejos
7684	2007-05-21	Manuel Francisco	Eduardo Jose	1m	2	0	0	poco	poco	sim	1	1	2	5	4	2	500	200	posto de s. magumbo	1	1	2	2	2	0		tem supervejos so
7685	2007-05-21	Manuel Francisco	Jose Eduardo	2m	1	0	0	poco	poco	0	1	1	2	5	2	2	350	250	posto de s. magumbo	1	1	2	2	2	0		tem supervejos so
7687	2007-05-29	Dercio Paulo	Tereza Manuel	40	1	0	0	em casa	em casa	sim	1	1	3	0.5	4	4	700	400	posto de s. magumbo	1	2	2	2	2	0		mosquitos e supervejos
7688	2007-05-27	Dercio Paulo	Antonio Joao Ngoka	3	2	0	0	em casa	em casa	sim	2	2	3	4	4	4	900	700	posto de s. magumbo	1	1	1	2	1	0		mosquitos e supervejos
7689	2007-05-24	Dercio Paulo	Raci Siquisse	45	1	0	0	em casa	em casa	sim	1	1	3	5	4	canico	600	300	posto de s. magumbo	1	2	2	2	2	0		mosquitos e supervejos
7690	2007-05-21	Dercio Paulo	Francisco Pedro	7m	2	0	0	em casa	em casa	sim	1	1	2	4	4	canico	550	300	posto de s. magumbo	1	1	1	2	2	0		so mosquitos
7691	2007-05-21	Dercio Paulo	Ercilia Joao	7m	1	0	0	em casa	em casa	0	1	1	2	6	2	2	450	250	posto de s. magumbo	1	2	2	2	2	0		so mosquitos
7693	2007-05-20	Manuel Francisco	Pedro Manguaula	52	1	0	1	na torneira	poco	sim	3	1	3	5	4	4	900	700	morrumbene	1	1	1	2	2	1		tem supervejos so
7692	2007-05-21	Manuel Francisco	Pedro Fernando	3s	2	0	0	poco	poco	sim	1	1	2	5	canico	2	400	200	posto de s. magumbo	1	1	2	2	2	0		tem supervejos so
7694	2007-05-22	Manuel Francisco	Jorge Francisco	2	4	0	0	poco	poco	sim	1	1	2	2	2	2	550	300	posto de s. magumbo	1	2	2	2	2	0		tem supervejos so
7695	2007-05-21	Dercio Paulo	Oliveira Francisco	9m	2	0	0	no vizinho	no vizinho	sim	1	1	2	6	3	canico	500	390	posto de s. magumbo	1	1	2	2	2	0		so mosquitos
7697-1	2007-05-21	Dercio Paulo	Francisco Jorge	3	1	0	0	em casa	em casa	0	1	1	3	6	4	canico	600	380	posto de s. magumbo	1	1	2	2	2	0		so mosquitos
7697	2007-05-21	Manuel Francisco	Isabel Francisco	1	2	0	0	poco	poco	0	1	1	2	4	4	canico	600	300	posto de s. magumbo	1	2	2	2	2	0		tem supervejos so
7699	2007-05-21	Manuel Francisco	Francisco Felizberto	5	3	0	0	poco	poco	sim	1	1	2	7	4	canico	500	300	posto de s. magumbo	1	1	2	2	2	0		tem supervejos so
7700	2007-05-21	Manuel Francisco	Ofelia Bernardo	2	1	0	0	poco	poco	0	1	1	2	10	2	2	350	200	posto de s. magumbo	1	2	2	2	2	0		tem supervejos so
7701	2007-05-21	Manuel Francisco	Valdimiro Francisco	2	1	0	0	poco	poco	0	1	1	2	5	2	2	400	250	posto de s. magumbo	1	2	2	2	2	0		tem supervejos so
7702	2007-05-21	Dercio Paulo	Ermenegildo Felizberto	5	2	0	0	em casa	em casa	sim	1	1	2	5	4	canico	500	290	posto de s. magumbo	1	1	2	2	2	0		so mosquitos
7703	2007-05-21	Dercio Paulo	Julio Ermenegildo	2	4	0	0	em casa	em casa	0	1	2	2	6	2	2	400	290	posto de s. magumbo	1	2	2	2	2	0		so mosquitos
7704	2007-05-21	Manuel Francisco	Cristina Nhanala	44	1	0	0	poco	poco	sim	1	1	2	5	4	canico	600	300	posto de s. magumbo	1	1	2	2	2	0		tem supervejos so
7705	2007-05-21	Manuel Francisco	Maria Felizberto	5	2	0	0	poco	poco	0	1	1	2	5	canico	2	400	200	posto de s. magumbo	1	2	2	2	2	0		tem supervejos so
7706	2007-05-21	Manuel Francisco	Rafael Felizberto	3	3	0	0	poco	poco	sim	1	1	2	5	2	2	400	250	posto de s. magumbo	1	1	2	2	2	0		tem supervejos so
7707	2007-05-21	Dercio Paulo	Felizberto Fernando	4	2	0	0	em casa	em casa	sim	1	1	2	4	4	canico	500	290	posto de s. magumbo	1	1	2	2	2	0		so mosquitos
7708	2007-05-21	Dercio Paulo	Edson Felizberto	2m	1	0	0	no vizinho	no vizinho	sim	1	1	2	5	3	canico	400	200	posto de s. magumbo	1	2	2	2	2	0		*mosquitos em excesso
7709	2007-05-21	Dercio Paulo	Albino Paulo	40	2	0	0	em casa	em casa	sim	1	1	2	7	4	canico	600	300	posto de s. magumbo	1	2	2	2	2	0		so mosquitos
7715	2007-05-21	Manuel Francisco	Miguel Ricardo	7	2	0	0	poco	poco	sim	1	1	2	10.5	4	canico	500	250	posto de s. magumbo	1	1	1	2	2	0		tem supervejos so
7716	2007-05-21	Dercio Paulo	Felizberto Ricardo	7	2	0	0	em casa	em casa	sim	1	1	2	5	4	canico	500	300	posto de s. magumbo	1	1	1	2	1	1		so mosquitos
7719-1	2007-05-25	Dercio Paulo	Josefa Joaquim	20	1	0	0	em casa	em casa	0	1	1	2	6	3	canico	500	300	posto de s. magumbo	1	2	2	2	2	0		mosquitos e supervejos
7719	2007-05-22	Manuel Francisco	Mariamo Ibraimo	1.6	1	0	0	poco	poco	0	1	1	2	5	2	2	400	250	posto de s. magumbo	1	2	2	2	2	0		tem supervejos so
7720	2007-05-22	Manuel Francisco	Manuel Fernando	6m	2	0	0	poco	poco	sim	1	1	2	4	2	2	400	250	posto de s. magumbo	1	1	2	2	2	0		tem supervejos so
7721	2007-05-21	Dercio Paulo	Augusto Pedro	1	1	0	0	em casa	em casa	sim	1	1	2	5	2	2	350	200	posto de s. magumbo	1	1	2	2	2	0		so mosquitos
7722	2007-05-21	Dercio Paulo	Isabel Francisco	12	1	0	1	em casa	em casa	sim	1	1	2	8	4	canico	600	400	posto de s. magumbo	1	1	2	2	2	0		so mosquitos
7722-1	2007-05-30	Dercio Paulo	Madalena Abrante	1	1	0	0	no vizinho	no vizinho	sim	1	1	3	4	4	canico	500	300	posto de s. magumbo	1	1	2	2	2	0		mosquitos e supervejos
7726	2007-05-31	Manuel Francisco	Antonio Joaquim	2	2	0	0	poco	poco	sim	1	1	2	5	canico	canico	400	250	posto de s. magumbo	1	1	2	2	2	0		tem supervejos so
7727	2007-05-31	Manuel Francisco	Albertina Antonio	2	2	0	0	poco	poco	0	1	1	2	7	2	2	300	250	posto de s. magumbo	1	2	2	2	2	0		tem supervejos so
7314	2007-05-19	Manuel Francisco	Regina Antonio	14	1	0	0	poco	poco	sim	3	3	3	5	4	4	1000	700	posto de s. magumbo	1	2	2	2	2	0		tem supervejos so
7314-1	2007-05-19	Manuel Francisco	Jacinto Fernando	14	2	0	0	poco	poco	sim	3	3	3	5	4	4	1000	700	posto de s. magumbo	1	1	1	1	1	1		tem supervejos so
7480	2007-02-21	Manuel Francisco	Pedro Fernando	62	2	0	0	poco	poco	sim	4	4	3	0	4	4	1000	900	posto de s. magumbo	1	1	2	2	2	0		e sempre supervejos
7480-1	2007-02-21	Manuel Francisco	Dalia Herculano	10	2	0	0	poco	poco	0	4	4	3	0	4	4	1000	900	posto de s. magumbo	1	2	2	2	2	0		e sempre supervejos
7480-2	2007-02-21	Manuel Francisco	Ana Armenia	20	1	0	0	poco	poco	0	4	4	3	0	4	4	1000	900	posto de s. magumbo	1	2	1	2	2	0		e sempre supervejos
7605--1	2007-02-19	Manuel Francisco	Fortunato Joao	40	2	0	0	poco	poco	sim	2	2	3	0	4	4	1200	900	posto de s. magumbo	1	1	1	2	1	0		e sempre supervejos
7605--2	2007-02-19	Manuel Francisco	Palricio Reginaldo		1	0	0	poco	poco	0	1	1	3		4	4	700	400	posto de s. magumbo	1	2	2	2	2	0		e sempre supervejos
7605--3	2007-02-19	Manuel Francisco	Gina Fernando	10	1	0	0	poco	poco	0	1	1	3	0	4	4	1200	900	posto de s. magumbo	1	2	2	2	2	0		e sempre supervejos
7621-1	2007-03-01	Manuel Francisco	Joana Temoteo	2	3	0	0	poco	poco	sim	2	2	3	0	4	4	965	460	posto de s. magumbo	1	2	2	2	2	0		mosquito e supervejos
7621	2007-03-01	Manuel Francisco	Antonio de Castro	2	2	0	0	poco	poco	sim	2	2	3	0	4	4	965	460	posto de s. magumbo	1	1	2	2	2	0		sempre ha mosquito

## Sheet: Children
# Casa	Nome	Birth date	age group	Sexo	Net	PIN	Educacao
7001	Ridson Lucio	2004	3	m	s	P003	0
7001 Count				1			1
7002	Leonardo Afonso	2001-09-10	6	m	n	P007	1
7002 Count				1			1
7003	Juvencia Afonso	1997-02-03	10	f	n	P004	3
7003 Count				1			1
7005	Suzete Anselmo	2000*	7	f	n	15	2
7005	Maria Pedro	1996*	11	f	n	14
7005 Count				2			1
7008	Lindinha Anselmo	2002-09-13	5	f	s	20
7008 Count				1			0
7009	Quinita Anselmo	2001-03-03	6	f	n	21
7009	Gercia Anselmo	1998*	9	f	n	23	3
7009 Count				2			1
7010	Dario Antonio	2006-11-07	1	m	s	26
7010 Count				1			0
7011	Agnesio Antonio	2001-03-17	6	m	n	27	0
7011 Count				1			1
7013	Tshefe Alves	2002*	5	m	s	30	0
7013	Evaristo Alves	2001*	6	m	s	32	1
7013	Luis Afonso	1995*	12	m	s	301	2
7013 Count				3			3
7020	Joselda Antonio	1993-07-27	14	f	n	52	5
7020 Count				1			1
7023	Gomes Paulo	1995-06-13	12	m	s	58	2
7023	Paulo A. Junior	1993-02-13	14	m	s	59	6
7023 Count				2			2
7027	Nina Galvao	1995*	12	f	n	63	5
7027 Count				1			1
7030	Alfeu Lino	1994-05-16	13	m	n	66	4
7030 Count				1			1
7031	Riston Adelto	2002-02-01	5	m	s	71	0
7031 Count				1			1
7050	Dalsandra Admiro	1997*	10	f	n	203	3
7050	Olimpia Admiro	1994*	13	f	n	202	5
7050 Count				2			2
7052	Osvaldo Valdez	1995	12	m	n	204	3
7052 Count				1			1
7055	Otilio Antonio	1998	9	m	n	209	2
7055	Maria Sebastiao	1994	13	f	n	208	4
7055 Count				2			2
7057	Iolanda Nelson	2001	6	f	n		1
7057 Count				1			1
7060	Iolanda Feliz	1999-08-07	8	f	n		2
7060 Count				1			1
7062	Delcia Osvaldo	2005	2	f	n	214
7062	Agnaldo Osvaldo	2002	5	m	n	213
7062 Count				2			0
7064	Adelaide Alberto	2001	6	f	n	218
7064 Count				1			0
7065	Edno Luisa	2004-05-23	3	m	n	221
7065	Tina Sergio	2000-08-26	7	f	n	220
7065 Count				2			0
7069	Joao Bernardo	1997	10	m	n		4
7069 Count				1			1
7070	Luisa Carlos	2004	3	f	n	146
7070 Count				1			0
7072	Jozeldo Joao	1994	13	m	n		5
7072 Count				1			1
7074	Anastancia Lazaro	1996	11	f	n	434	5
7074 Count				1			1
7077	Joana Caetano	1995-10-03	12	f	n	359	2
7077 Count				1			1
7078	Gonsalves Caetano	1995*	12	m	n	363	4
7078 Count				1			1
7083	Milton Raul	2005	2	m	n	192
7083	Paulo Dercio	2003	4	m	n
7083 Count				2			0
7084	Florinda Antonio	1999	8	f	n		2
7084	Joana Caetano	1995	12	f	n		2
7084	Belinha Caetano	1994	13	f	n		4
7084 Count				3			3
7086	Marcelino Joaquim	1999-01-04	8	m	n		2
7086 Count				1			1
7087	Juvencio Joaquim	10/8/96!	11	m	n
7087 Count				1			0
7093	Menalda Salvador	1994*	13	f	n		7
7093 Count				1			1
7096	Edmundo Ventura	2001	6	m	n	228
7096 Count				1			0
7097	Maninha da Sandra	1997-07-13	10	f	n		4
7097	Jose Luis	1994	13	m	n	225	4
7097 Count				2			2
7103	Paito Jose	1999*	8	m	n	482	2
7103 Count				1			1
7105	Dercio Oliveira	2006-05-16	1	m	n	212
7105 Count				1			0
7109	Fernando Afonso	2005*	2	m	n	190
7109	Taila Afonso	1998*	9	f	n	420	4
7109 Count				2			1
7110	Paulo Afonso	1995	12	m	n	456	4
7110 Count				1			1
7112	Madalena Chico	1998-08-20	9	f	n		3
7112	Preciosa Chico	1994-01-12	13	f	n		4
7112 Count				2			2
7113	Preciosa Gildo	1994	13	f	n	421	5
7113 Count				1			1
7115	Elton Francisco	2005	2	m	n
7115 Count				1			0
7118	Acacio Genoveva	2003-02-11	4	m	n
7118	Efigenia Genoveva	1999-09-26	8	f	n		2
7118 Count				2			1
7119	Belinha Tomas	1999	8	f			2
7119 Count				1			1
7138	Iolando Jorge	1997	10	f	n		3
7138	Melita Jorge	1995	12	f	n		4
7138	Etelevina Jorge	1993	14	f	n		7
7138 Count				3			3
7140	Teofelo Momade	2000	7	m	n	232	1
7140	Otilia Manuel	1997	10	f	n	233	3
7140 Count				2			2
7145	Yurca Pedro	2006	1	f	n	244
7145 Count				1			0
7146	Bevinda Felisberto	1999	8	f	n	262	1
7146 Count				1			1
7149	Ilodia Venancio	2005	2	f	n	250
7149	Bevinda Venancio	2000	7	f	n	249	1
7149	Josefa Augusto	1997	10	f	n	246	3
7149	Rosa Venancio	1994	13	f	n	245	4
7149 Count				4			3
7150	Anacleta Renaldo	2006	1	f	n	252
7150 Count				1			0
7151	Anabela Armaldo	2003	4	f	n	255
7151	Banito Arnaldo	2001	6	m	n	256
7151 Count				2			0
7160	Melinda Americo	1995	12	f	n	272	3
7160 Count				1			1
7161	Fernando Americo	1993	14	m	n	274	5
7161 Count				1			1
7173	Nelson Americo	1994	13	m	n		5
7173 Count				1			1
7174	Paulo Americo	1995	12	m	n		4
7174 Count				1			1
7175	Juvencio Gama	2004	3	m	n
7175	Antonio Filipe	1997	10	f	n		4
7175	Raul Filipe	1995	12	m	n		4
7175 Count				3			2
7176	Cristino Amade	2003-08-20	4	m	n
7176	Amigy Augusto	1993-05-31	14	m	n		4
7176 Count				2			1
7179	Carvalinho Fernando	2005	2	m	s
7179 Count				1			0
7185	Carlos Dekeis	2000*	7	m	n	103	2
7185	Antonio Afonso	1998*	9	m	n	102	5
7185	Aderito Afonso	1996-01-04	11	m	n	178	4
7185 Count				3			3
7187	Alirio Rui	2003*	4	m	n	108
7187	Carlos Rui	1998*	9	m	n	368	3
7187 Count				2			1
7192	Juvencio Tiago	2000	7	m	n
7192	Jose Tiago	1996	11	m	n		4
7192	Pedro Alberto	1994	13	m	n		4
7192 Count				3			2
7197	Gercio Eduardo	2000-02-26	7	m	n		2
7197 Count				1			1
7198	Antonio Joao	1999	8	m	n		2
7198	Baptista Joao	1998	9	m	n		3
7198	Marta Joao Rafael	1992	13	f	n
7198 Count				3			2
7200	Ivania Alfredo	1997*	10	f	n	76	3
7200	Bevinda Alfredo	1997*	10	f	n	77	3
7200	Luisa Emidio	1995-08-11	12	f	n	78	4
7200	Felizarda Alfredo	1993*	14	f	n	75	6
7200 Count				4			4
7201	Isabel Nelson	2003	4	f	s	81
7201 Count				1			0
7202	Laura Armando	1998-02-08	9	f	n	94	3
7202 Count				1			1
7203	Albertina Vasco	2003-06-09	4	f	n	84
7203 Count				1			0
7205	Otilia Carlos	98	9	f	n	87	3
7205 Count				1			1
7206	Luria Filipe	2005-02-05	2	f	n	164
7206 Count				1			0
7207	Otilia Carlos	1998*	9	f	n		3
7207	Catarina Joaquim	1993*	14	f	n		5
7207 Count				2			2
7208	Antonio Filipe	1998*	9	m	n	390	3
7208	Raul Filipe	1996*	11	m	n	417	3
7208 Count				2			2
7209	Junior Joaquim	2004	3	m	n	91
7209	Ana Joaquim	2001	6	f	n	92	1
7209 Count				2			1
7214	Edson Ronaldo	2006	1	m	n	172
7214 Count				1			0
7216	Vanansa Joaquim	1995*	12	f	n		3
7216	Lucrencia Joaquim	1994*	13	f	n		4
7216 Count				2			2
7221	Indercia Valdiz	2000	7	f	n	468	1
7221 Count				1			1
7222	Aparicio Valdiz	1996	11	m	n	406	3
7222 Count				1			1
7223	Fatima Andre	2006	1	f
7223	Assucena Andre	2003	4	f
7223	Rodolfo Andre	2001	6	m
7223 Count				3			0
7224	Sergio Jaime	2000	7	m	s		1
7224 Count				1			1
7228	Raul Sebastiao	1999	8	m	n	476	1
7228 Count				1			1
7231	Candido Americo	2003	4	m	s
7231	Fernando Americo	2000	7	m	s		1
7231 Count				2			1
7232	Admiro Antonio	2006	1	m	n
7232	Inercio Gilberto	2000	7	f	n		2
7232	Antonio Arlindo	1999	8	m	n		2
7232 Count				3			2
7235	Dadva Pedro	2001	6	f	n	343	1
7235	Nilda Jose	1998	9	f	n	339	1
7235 Count				2			2
7236	Dagno Jose	1998	9	m	n		2
7236	Juvencio Jose	1998	9	m	n	418	2
7236	Ivo Maria	1994	13	m	n		6
7236 Count				3			3
7237	Renalda Candido	2006	1	f	n
7237	Miguel Eduardo	1999*	8	m	n		1
7237	Rita Eduardo	1997*	10	f	n		4
7237 Count				3			2
7239	Lepoldina Guilhermina	1994*	13	f	s		6
7239 Count				1			1
7240	Yuran Gracio	2003*	4	m	s
7240	Noemia da Erminia	2001*	6	f	s
7240 Count				2			0
7251	Tina Januario	2001	6	f	n
7251 Count				1			0
7253	Lino Jovito	1997*	10	m	n	335	4
7253	Florencio Jovito	1995*	12	m	n		5
7253 Count				2			2
7255	Eulalia Lucio	1997-07-09	10	f	n		5
7255 Count				1			1
7258	Lucia Jose	2000-12-08	7	f	n	340	1
7258 Count				1			1
7260	Chelcia Antonio	2005-02-26	2	f	n
7260 Count				1			0
7261	Micaela Suleimane	1997*	10	f	n
7261 Count				1			0
7264	Edmilson Augusto	2001-09-02	6	m	n
7264	Marla Augusto	1997-04-07	10	f	n		4
7264 Count				2			1
7265	Edimundo Eduardo	1993-06-25	14	m	n		6
7265 Count				1			1
7267	Sergio Luis	2002	5	m	n
7267 Count				1			0
7269	Lutercia Eduardo	1996-10-28	11	f	n	449	5
7269 Count				1			1
7279	Edson Caetano	2004*	3	m	n
7279	Vina Caetano	2003*	4	f	n		1
7279	Minoca Caetano	2002*	5	f	n		3
7279 Count				3			2
7282	Vasco Antonio	1993*	14	m	n	334	4
7282 Count				1			1
7286	Felizarda Joao	1998	9	f	n		2
7286	Rute Joao	1998	9	f	n		2
7286	Juvencio Afonso	1998	9	m	n		2
7286 Count				3			3
7289	Juvencia Luis	2004*	3	f	n
7289	Nelcia Luis	2002*	5	f	n
7289	Maria Luis	2000*	7	f	n		3
7289 Count				3			1
7302	Linda Anibal	2006	1	f		96	5
7302 Count				1			1
7303	Titinha Anibal	2003	4	f	n	100
7303	Ofelia Anibal	2000	7	f	n	99	2
7303	Pascoal Anibal	1998	9	m	n	98	2
7303	Nelia Anibal	1994	13	f	n		5
7303	Amalia Anibal	1993	14	f	n	97	2
7303 Count				5			4
7304	Roberto Carlos	2004	3	m	n
7304 Count				1			0
7305	Belsonia Carlos	2001	6	f	s	323
7305	Nelia Carlos	1998	9	f	s	419	2
7305 Count				2			1
7306	Dercio Carlos	1996	11	m	n	445	4
7306 Count				1			1
7307	Adelto Fernando	1999	8	m	n	322	2
7307	Juvenalda Felizarda	1994	13	f	n	321	5
7307 Count				2			2
7308	Laura Banguela	1944	3	f	n		2
7308 Count				1			1
7309	Aissa Simalgi	2004	3	f	n
7309 Count				1			0
7313	Osvalda Joao	1994	13	f	n	459	4
7313 Count				1			1
7322	Paulo Antonio	1996	11	m	n		4
7322 Count				1			1
7324	Eldia Sergio	2005	2	f	n
7324 Count				1			0
7325	Olivia Antonio	2006	1	f	s
7325	Arcenio Antonio	2003	4	m	n
7325	Regina Antonio	2001	6	f	n
7325 Count				3			0
7327	Angelo Antonio	2001	6	m	n		1
7327 Count				1			1
7328	Edmilson Jose	2005	2	m	n
7328	Cacilda Baptista	1997	10	f	n		4
7328 Count				2			1
7329	Maria Jose	1997	10	f	n		4
7329 Count				1			1
7336	Lucia Zildo	2001	6	f	n
7336	Nelcia Zildo	1998	9	f	n		2
7336	Belugencia Zildo	1995	12	f	n		4
7336 Count				3			2
7337	Claudencia Zildo	2003	4	f	s
7337 Count				1			0
7341	Constantino Jose	2005	2	m	s
7341 Count				1			0
7342	Eurola Valdimiro	2005-12-18	2	f	n
7342 Count				1			0
7345	Juvencio Edmundo	2005-01-08	2	m	n
7345 Count				1			0
7347	Inocencia Sergio	1998	9	f	s		2
7347 Count				1			1
7348	Maria Sergio	2001	6	f	s		1
7348 Count				1			1
7349	Virgilio Sergio	1995	12	m	n		4
7349 Count				1			1
7352	Zulfa Izidro	2006	1	f	n
7352 Count				1			0
7353	Adercio Izidro	2005	2	m	n
7353	Tereza Izidro	2000	7	f	n
7353	Alex Izidro	1997	10	m	n	365	3
7353	Xavier Izidro	1994	13	m	n		4
7353 Count				4			2
7354	Tereza Pedro	1995	12	f	n	372
7354 Count				1			0
7355	Atonieta Joao	2000	7	f	n
7355 Count				1			0
7361	Mariamo da Silva	2000	7	f	n	385	3
7361	Iolanda da Silva	1999	8	f	n	452	4
7361 Count				2			2
7363	Ana Joao	2000	7	f	n	469	1
7363	Palmira Sergio	1998	9	f	n		2
7363 Count				2			2
7364	Alcidio Antonio	1993	14	m	n		7
7364 Count				1			1
7365	Evenilda Antonio	1998	9	f	n		1
7365	Oria Joao	1996	11	f	n	453	3
7365	Ricardina Antonio	1995	12	f	n
7365	Amina Antonio	1994	13	f	n		5
7365 Count				4			3
7371	Alcidio Baptista	1996	11	m	n		3
7371	Emidio Antonio	1994	13	m	n		5
7371 Count				2			2
7373	Edimundo Ranito	2003-03-25	4	m
7373	Gessica Feliz	1998-05-30	9	f
7373	Ana Joao	1997	10	f
7373	Amelia Fernando	1995	12	f
7373 Count				4			0
7374	Biernete James	2006	1	f	s
7374 Count				1			0
7377	Arcenio Herculano	2001-11-25	6	m	n	90
7377	Etelevino Herculano	1999	8	m	n		1
7377	Florentina Jordao	1997-01-25	10	f	n	109	3
7377 Count				3			2
7380	Neusa Paulo	2005*	2	f	s
7380	Jakson Paulo	2003	4	m	s
7380 Count				2			0
7387	Tunelca Sumalgi	2001-10-16	6	f	n	324	1
7387 Count				1			1
7403	Ilva Alberto	2006	1	f	n	202	0
7403 Count				1			1
7405	Elio Carlos	2000	7	m	n		0
7405 Count				1			1
7406	Nilza Jorge	1994	13	f	n		4
7406 Count				1			1
7411	Elsa Eulidio	2006	1	f	n
7411	Sergio Eulidio	2003	4	m	n
7411	Atanacia Eulidio	2000	7	f	n	495	2
7411 Count				3			1
7413	Advenia Juliao	2004	3	f	n
7413	Edmilson Juliao	2000	7	m	n
7413 Count				2			0
7415	Argentina da Angelica	1999*	8	f	n		3
7415	Silvia Felizberto	1998-04-28	9	f	n	402	4
7415 Count				2			2
7417	Ivone Manuel	1997*	10	f	n		5
7417 Count				1			1
7422	Valodio Emidio	2005	2	m	n
7422	Armando Ivone	2003	4	m	n
7422	Elton Emidio	2001	6	m	n		1
7422 Count				3			1
7426	Neia Rodrigues	2003-05-05	4	f	n	502
7426 Count				1			0
7430	Carolina Hmberto	1997	10	f	n		3
7430 Count				1			1
7435	Nuro Galvao	2002-05-20	5	m	n
7435 Count				1			0
7436	Olivia Galvao	2003-04-02	4	f	n	545
7436	Ivo Galvao	1998	9	m	n	336	2
7436 Count				2			1
7437	Antonio Galvao	1996-05-26	11	m	n		2
7437 Count				1			1
7449	Leonilde Daissa	2003	4	m	n
7449 Count				1			0
7453	Joana Luis	2002	5	f	n		1
7453	Jorge Luis	2000	7	m	n		1
7453	Guilherme Joao	1994	13	m	n		0
7453 Count				3			3
7454	Manuel Jorge	1993	14	m	n		6
7454 Count				1			1
7456	Anastancia Leonardo	2002	5	f	n	111	0
7456 Count				1			1
7460	Alberto Francisco	1996	11	m	n	415	3
7460 Count				1			1
7462	Euclidio Armano	2000	7	m	n	463	1
7462	Leonor Tomas	1985	12	f	n		7
7462 Count				2			2
7464	Ana ernesto	2006	1	f	n
7464 Count				1			0
7466	Ernesto J.Ernesto	2004	3	m	n
7466	Mileniu Ernesto	1999	8	m	n		2
7466 Count				2			1
7470	Edilson Sergio	2004	3	m	n
7470	Mercia Sergio	2000	7	f	n		2
7470	Marta Sergio	1997	10	f	n		4
7470 Count				3			2
7472	Edmilton Manuel	2001	6	m	n
7472 Count				1			0
7473	Delto Agostinho	2001	6	m	n
7473	Anastancia Agostinho	1997	10	f	n		4
7473	Esperanca Agostinho	1995	12	f	n		6
7473	Lija Agostinho	1993	14	f	n		5
7473 Count				4			3
7474	Emilia Manuel	2006	1	f	n
7474	Ercidio Manuel	2003	4	m	n
7474	Milton Manuel	2003	4	m	n
7474	Odecia Manuel	2000	7	f	n		2
7474 Count				4			1
7485	Albino Augusto	2005	2	m	n
7485 Count				1			0
7488	Joaquina Ricardo	2000	7	f	n		1
7488	Leona Ricardo	1997	10	f	n		3
7488	Leodercio Felisberto	1997	10	f	n		4
7488	Irene Ricardo	1994	13	f	n		4
7488 Count				4			4
7492	Edson J.Damiao	2005	2	m	n
7492	Beatriz da Maura	2001	6	f	n	338	1
7492 Count				2			1
7496	Nicolau Rui	1997	10	m	n		3
7496	Ilda Rui	1994	13	f	n	451	4
7496 Count				2			2
7611	Anastancio Felimone	1991	14	m	n		6
7611 Count				1			1
7612	Edson Daniel	2006	1	m	n
7612 Count				1			0
7619	Ilodia Carlos	2004	3	f	n
7619	Lucrencia Alfredo	1997	10	f	n		4
7619 Count				2			1
7622	Jose Brito Antonio	2002	5	m	n
7622	Florencio Antonio	1997	10	m	n		3
7622 Count				2			1
7626	Delefina Antonio	2005	2	f	n
7626 Count				1			0
7627	Juvencio Antonio	1998	9	m	n		2
7627	Anibal Antonio	1996	11	m	n		4
7627 Count				2			2
7630	Marta Ernesto	1999	8	f	n		4
7630 Count				1			1
7639	Inocencia Admiro	1995	12	f	n		5
7639	Tereza Joaquim	1993	14	f	n		5
7639 Count				2			2
7641	Adelto Luis	1996	11	m	n		3
7641 Count				1			1
7644	Amelia Alberto	1996	11	f	n		3
7644 Count				1			1
7645	Gildo Armando	2001	6	m	n		3
7645 Count				1			1
7646	Guilermina Amancio	2005	2	f	n
7646 Count				1			0
7649	Rita Luis	7994	13	f	n		7
7649 Count				1			1
7662	Arnaldo Salomao	2000	7	m	n		2
7662 Count				1			1
7673	Jorge Jovito	1994	13	m	n		5
7673 Count				1			1
7676	Euridic Xaxai	1998	9	f	n		4
7676	Angelo Xaxai Junior	1996	11	m	n		6
7676 Count				2			2
7677	Saldita Manuel	2006	1	f	n
7677 Count				1			0
7678	Cacilda Manuel	2002	5	f	n		1
7678	Mario Manuel	1996	11	m	n		4
7678 Count				2			2
7694	Jucrancia Jorge	2003	4	f
7694 Count				1			0
7699	Edmilson Francisco	2004	3	m	n
7699 Count				1			0
7700	Ofelia Bernardo	1999	8	f	n		3
7700 Count				1			1
7701	Valdimiro Francisco	1994	13	m	n		6
7701 Count				1			1
7703	Erminio Ermenegildo	2005	2	m	n
7703	Raufo Ermenegildo	2004	4	m	n
7703	Adelto Ermenegildo	2000	7	m	n		1
7703	Julio Ermenegildo	1998	9	m	n		1
7703 Count				4			2
7708	Edson Felizberto	2000	7	m	n
7708 Count				1			0
7721	Augusto Pedro	1995	12	m	n		5
7721 Count				1			1
7727	Lurdes Antonio	1993	14	f	n		7
7727 Count				1			1
7480-1	Jessica januario	2000	7	f	n		3??
7480-1	Dalia Herculano	1995	12	f	n		5
7480-1 Count				2			2
7605-2	Gina Fernando	1996*	11	f	n		3
7605-2 Count				1			1
7697-1	Francisco Jorge	2001	6	m	n		2
7697-1 Count				1			1
Grand Count				314			205
