# Supplementary material for: Malaria prevalence and incidence in an isolated, meso-endemic area of Mozambique
Source: PeerJ. 2015 Nov 5;3:e1370. doi: 10.7717/peerj.1370 (PMC4647567; doi:10.7717/peerj.1370)
Supplement: Data S3 [file peerj-03-1370-s005.xlsx]

## Sheet: Residents
Year	Week number	Age	new Age group	Age group	Sexo	Temp	fever	no fever	used net	no net	Result	Not malaria	Diagnosed	Confirmed	Neg
2010	35	0.25	1	1	2	38.8	1	0	1	0	pf+	0	1	1	0
2010	18	0.583333	1	1	1	41.1	1	0	1	0	pf+	0	1	1	0
2010	22	0.583333	1	1	2	38.1	1	0	1	0	pf++	0	1	1	0
2011	11	0.583333	1	1	1	38.9	1	0	1	0	PF1	0	1	1	0
2010	19	0.666667	1	1	1	37.8	1	0	1	0	pf+	0	1	1	0
2010	23	0.666667	1	1	1	38.8	1	0	1	0	pf++	0	1	1	0
2010	15	0.75	1	1	2	38.6	1	0	1	0	pf+	0	1	1	0
2010	15	0.75	1	1	1	38.4	1	0	1	0	pf+	0	1	1	0
2010	19	0.75	1	1	1	39.1	1	0	1	0	pf+	0	1	1	0
2010	12	0.833333	1	1	2	38.6	1	0	1	0	pf+	0	1	1	0
2009	23	0.916667	1	1	2	38.9	1	0	1	0	pf+	0	1	1	0
2010	20	1	2	2	2	39.2	1	0	1	0	pf+	0	1	1	0
2011	16	1.16667	2	2	1	38.4	1	0	1	0	pf+	0	1	1	0
2011	3	1.41667	2	2	2	38	1	0	1	0	PF1	0	1	1	0
2010	14	1.5	2	2	1	37.6	1	0	1	0	pf+	0	1	1	0
2010	16	1.5	2	2	1	39.6	1	0	1	0	pf+	0	1	1	0
2010	16	1.5	2	2	2	37.7	1	0	1	0	tr(+)	0	1	1	0
2010	32	1.5	2	2	2	39.5	1	0	1	0	pf+	0	1	1	0
2010	37	1.5	2	2	1	38.8	1	0	1	0	pf+	0	1	1	0
2010	21	1.5	2	2	2	38.4	1	0	1	0	pf+	0	1	1	0
2010	27	1.5	2	2	1	38.2	1	0	1	0	pf+	0	1	1	0
2011	11	1.5	2	2	2	39.8	1	0	1	0	PF1	0	1	1	0
2011	11	1.5	2	2	1	40.1	1	0	1	0	PF1	0	1	1	0
2011	12	1.6	2	2	1	39.5	1	0	1	0	pf+	0	1	1	0
2011	12	1.6	2	2	1	37.8	1	0	1	0	pf+	0	1	1	0
2011	12	1.6	2	2	1	37.7	1	0	1	0	pf+	0	1	1	0
2011	12	1.8	2	2	1	39.1	1	0	1	0	pf+	0	1	1	0
2010	16	1.83333	2	2	1	38.1	1	0	1	0	tr(+)	0	1	1	0
2010	33	1.83333	2	2	2	38.1	1	0	1	0	pf+	0	1	1	0
2010	14	1.91667	2	2	2	39.9	1	0	1	0	pf+	0	1	1	0
2009	19	2	2	2	2	38	1	0	1	0	pf+	0	1	1	0
2009	24	2	2	2	1	38.7	1	0	1	0	pf+	0	1	1	0
2009	26	2	2	2	2	38.3	1	0	1	0	pf+	0	1	1	0
2010	8	2	2	2	2	40.4	1	0	1	0	3 pf(+)	0	1	1	0
2010	14	2	2	2	2	38.6	1	0	1	0	pf+	0	1	1	0
2010	22	2	2	2	1	38.6	1	0	1	0	pf++++	0	1	1	0
2010	31	2	2	2	2	38.1	1	0	1	0	pf+	0	1	1	0
2010	42	2	2	2	1	38.6	1	0	1	0	pf+	0	1	1	0
2010	26	2	2	2	2	41	1	0	1	0	pf+	0	1	1	0
2010	27	2	2	2	1	37.8	1	0	1	0	pf+	0	1	1	0
2010	29	2	2	2	2	37.8	1	0	1	0	pf+	0	1	1	0
2011	12	2	2	2	1	38	1	0	1	0	pf+	0	1	1	0
2011	18	2	2	2	1	38.9	1	0	1	0	pf+	0	1	1	0
2010	40	2.25	2	2	1	38.3	1	0	1	0	pf+	0	1	1	0
2009	13	2.41667	2	2	1	37.9	1	0	1	0	trpf(+)	0	1	1	0
2010	21	2.41667	2	2	2	38.1	1	0	1	0	pf+	0	1	1	0
2009	13	2.58333	2	2	2	38.2	1	0	1	0	trpf(+)	0	1	1	0
2011	14	2.8	2	2	2	38.4	1	0	1	0	pf+	0	1	1	0
2010	13	3	2	2	2	39.2	1	0	1	0	pf+	0	1	1	0
2010	15	3	2	2	2	38.9	1	0	1	0	pf+	0	1	1	0
2010	15	3	2	2	1	38.4	1	0	1	0	pf+	0	1	1	0
2010	19	3	2	2	1	40.5	1	0	1	0	pf+	0	1	1	0
2010	22	3	2	2	2	37.7	1	0	1	0	pf+	0	1	1	0
2010	31	3	2	2	2	38.4	1	0	1	0	pf+	0	1	1	0
2010	22	3	2	2	2	37.7	1	0	1	0	pf+	0	1	1	0
2011	12	3	2	2	2	39.5	1	0	1	0	pf+	0	1	1	0
2011	14	3	2	2	2	38	1	0	1	0	pf+	0	1	1	0
2011	14	3	2	2	1	38.7	1	0	1	0	pf+	0	1	1	0
2011	14	3	2	2	2	37.6	1	0	1	0	pf+	0	1	1	0
2011	15	3	2	2	1	37.8	1	0	1	0	pf+	0	1	1	0
2010	13	4	2	2	2	37.7	1	0	1	0	pf+	0	1	1	0
2010	14	4	2	2	2	40.4	1	0	1	0	pf+	0	1	1	0
2010	14	4	2	2	2	39.7	1	0	1	0	pf+	0	1	1	0
2010	14	4	2	2	2	38.5	1	0	1	0	pf+	0	1	1	0
2010	15	4	2	2	2	37.6	1	0	1	0	pf+	0	1	1	0
2010	18	4	2	2	2	37.9	1	0	1	0	pf+	0	1	1	0
2010	19	4	2	2	1	38.5	1	0	1	0	pf+	0	1	1	0
2010	35	4	2	2	1	38.4	1	0	1	0	pf+	0	1	1	0
2010	27	4	2	2	1	40	1	0	1	0	pf+	0	1	1	0
2010	29	4	2	2	2	37.7	1	0	1	0	pf+	0	1	1	0
2011	11	4	2	2	1	39.1	1	0	1	0	PF1	0	1	1	0
2011	13	4	2	2	2	38.5	1	0	1	0	pf+	0	1	1	0
2010	16	4.83333	2	2	1	40.1	1	0	1	0	pf+	0	1	1	0
2009	26	4.41667	3	2	2	38.9	1	0	1	0	pf+	0	1	1	0
2009	22	5	3	3	1	39.4	1	0	1	0	pf+	0	1	1	0
2010	14	5	3	3	2	39.7	1	0	1	0	pf+	0	1	1	0
2010	17	5	3	3	2	39.2	1	0	1	0	tr(+)	0	1	1	0
2010	18	5	3	3	1	39.5	1	0	1	0	pf+	0	1	1	0
2010	21	5	3	3	1	39.2	1	0	1	0	pf+	0	1	1	0
2011	11	5	3	3	1	39.2	1	0	1	0	PF1	0	1	1	0
2011	16	5	3	3	2	37.8	1	0	1	0	pf+	0	1	1	0
2011	19	5	3	3	2	38.7	1	0	1	0	pf+	0	1	1	0
2009	22	6	3	3	2	38.4	1	0	1	0	pf+	0	1	1	0
2010	18	6	3	3	1	39.9	1	0	1	0	pf+	0	1	1	0
2010	22	6	3	3	2	40.1	1	0	1	0	pf+	0	1	1	0
2010	22	6	3	3	2	40.1	1	0	1	0	pf+	0	1	1	0
2010	28	6	3	3	1	37.6	1	0	1	0	pf+	0	1	1	0
2011	1	6	3	3	2	38	1	0	1	0	PF1	0	1	1	0
2011	18	6	3	3	1	39.1	1	0	1	0	pf+	0	1	1	0
2010	16	7	3	3	1	38.6	1	0	1	0	tr(+)	0	1	1	0
2010	18	7	3	3	1	39.6	1	0	1	0	pf+	0	1	1	0
2010	19	7	3	3	1	37.6	1	0	1	0	pf+	0	1	1	0
2010	19	7	3	3	2	39	1	0	1	0	pf+	0	1	1	0
2010	22	7	3	3	2	38.1	1	0	1	0	pf+	0	1	1	0
2010	42	7	3	3	2	39.2	1	0	1	0	pf+	0	1	1	0
2011	12	7	3	3	1	38.6	1	0	1	0	pf+	0	1	1	0
2010	11	8	3	3	1	38.3	1	0	1	0	pf+	0	1	1	0
2011	11	8	3	3	1	37.7	1	0	1	0	PF1	0	1	1	0
2011	17	8	3	3	1	38	1	0	1	0	pf+	0	1	1	0
2009	24	9	3	3	2	39.2	1	0	1	0	pf+	0	1	1	0
2009	45	9	3	3	2	39.2	1	0	1	0	pf+	0	1	1	0
2010	10	9	3	3	2	38.9	1	0	1	0	pf+	0	1	1	0
2010	13	9	3	3	2	37.7	1	0	1	0	pf+	0	1	1	0
2010	26	9	3	3	2	39.2	1	0	1	0	pf+	0	1	1	0
2011	12	9	3	3	1	39	1	0	1	0	pf+	0	1	1	0
2010	13	10	4	4	1	37.8	1	0	1	0	pf+	0	1	1	0
2010	19	10	4	4	2	39.5	1	0	1	0	pf+	0	1	1	0
2010	32	10	4	4	2	38.3	1	0	1	0	pf+	0	1	1	0
2009	26	12	4	4	1	37.8	1	0	1	0	pf+	0	1	1	0
2010	14	12	4	4	2	40.5	1	0	1	0	pf+	0	1	1	0
2010	17	15	5	5	1	39.1	1	0	1	0	tr(+)	0	1	1	0
2010	19	16	5	5	2	38.9	1	0	1	0	pf+	0	1	1	0
2011	12	17	5	5	1	38.3	1	0	1	0	pf+	0	1	1	0
2009	27	18	5	5	2	38.2	1	0	1	0	pf+	0	1	1	0
2011	12	18	5	5	2	38	1	0	1	0	pf+	0	1	1	0
2010	27	19	5	5	2	38.2	1	0	1	0	pf+	0	1	1	0
2011	12	20	5	6	2	38.8	1	0	1	0	pf+	0	1	1	0
2011	13	20	5	6	2	38.4	1	0	1	0	pf+	0	1	1	0
2011	15	20	5	6	2	37.6	1	0	1	0	pf+	0	1	1	0
2010	17	21	5	6	1	39.4	1	0	1	0	tr(+)	0	1	1	0
2010	23	21	5	6	2	39.2	1	0	1	0	pf+	0	1	1	0
2010	23	21	5	6	1	38.7	1	0	1	0	pf+	0	1	1	0
2010	35	22	5	6	1	38	1	0	1	0	pf+	0	1	1	0
2010	40	23	5	6	1	38.9	1	0	1	0	pf+	0	1	1	0
2010	31	24	5	6	2	38.4	1	0	1	0	pf+	0	1	1	0
2010	13	25	5	6	2	38.9	1	0	1	0	pf+	0	1	1	0
2010	42	25	5	6	2	37.9	1	0	1	0	pf+	0	1	1	0
2010	30	28	5	6	2	37.8	1	0	1	0	pf+	0	1	1	0
2010	23	31	5	7	2	38.8	1	0	1	0	pf+	0	1	1	0
2009	41	32	5	7	1	38.5	1	0	1	0	pf+	0	1	1	0
2010	33	32	5	7	2	39.8	1	0	1	0	pf+	0	1	1	0
2010	40	32	5	7	2	38	1	0	1	0	pf+	0	1	1	0
2010	27	37	5	7	2	38.7	1	0	1	0	pf+	0	1	1	0
2010	10	39	5	7	2	38.9	1	0	1	0	pf+	0	1	1	0
2010	10	40	6	7	2	38.7	1	0	1	0	pf+	0	1	1	0
2010	32	44	6	7	1	38.3	1	0	1	0	pf+	0	1	1	0
2010	10	45	6	7	1	38.4	1	0	1	0	pf+	0	1	1	0
2010	19	48	6	7	2	37.7	1	0	1	0	pf+	0	1	1	0
2010	36	52	6	8	1	38.7	1	0	1	0	pf+	0	1	1	0
2011	14	53	6	8	1	38.4	1	0	1	0	pf+	0	1	1	0
2010	35	54	6	8	1	37.8	1	0	1	0	pf+	0	1	1	0
2010	16	56	6	8	1	39.2	1	0	1	0	tr(+)	0	1	1	0
2010	41	56	6	8	2	38.7	1	0	1	0	pf+	0	1	1	0
2010	36	61	6	8	2	37.8	1	0	1	0	pf+	0	1	1	0
2010	22	69	6	8	2	40.1	1	0	1	0	pf+	0	1	1	0
2010	42	74	6	8	1	38.7	1	0	1	0	pf+	0	1	1	0
2010	17	75	6	8	1	38.2	1	0	1	0	pf+	0	1	1	0
2009	22	0.416667	1	1	2	38	1	0	0	1	pf+	0	1	1	0
2010	23	1.5	2	2	2	39	1	0	0	1	pf+	0	1	1	0
2011	11	2.5	2	2	2	39.5	1	0	0	1	PF1	0	1	1	0
2010	16	3.75	2	2	2	37.8	1	0	0	1	pf+	0	1	1	0
2009	24	4	2	2	1	39.4	1	0	0	1	pf+	0	1	1	0
2009	45	4	2	2	1	39.4	1	0	0	1	pf+	0	1	1	0
2011	11	6	3	3	1	39.8	1	0	0	1	PF1	0	1	1	0
2010	26	7	3	3	2	37.8	1	0	0	1	pf+	0	1	1	0
2009	23	9	3	3	1	39.4	1	0	0	1	pf+	0	1	1	0
2010	9	9	3	3	1	37.7	1	0	0	1	pf+	0	1	1	0
2010	13	10	4	4	1	37.8	1	0	0	1	pf+	0	1	1	0
2010	10	11	4	4	1	37.7	1	0	0	1	pf+	0	1	1	0
2010	17	11	4	4	2	40.5	1	0	0	1	pf+	0	1	1	0
2010	36	11	4	4	1	37.8	1	0	0	1	pf+	0	1	1	0
2011	11	11	4	4	2	38.5	1	0	0	1	PF1	0	1	1	0
2010	1	15	5	5	1	39.2	1	0	0	1	PF1	0	1	1	0
2010	13	18	5	5	1	37.7	1	0	0	1	pf+	0	1	1	0
2010	16	20	5	6	1	38.8	1	0	0	1	pf+	0	1	1	0
2010	11	40	6	7	2	38.7	1	0	0	1	pf+	0	1	1	0
2010	15	68	6	8	2	37.8	1	0	0	1	pf+	0	1	1	0
2009	31	0.416667	1	1	2	37.9	1	0	1	0		0	1	0	0
2009	38	0.416667	1	1	2	38.4	1	0	1	0		0	1	0	0
2009	35	0.583333	1	1	2	38.6	1	0	1	0		0	1	0	0
2010	23	0.583333	1	1	2	40.6	1	0	1	0	40	0	1	0	0
2009	34	0.833333	1	1	1	39	1	0	1	0		0	1	0	0
2009	39	0.916667	1	1	2	38.8	1	0	1	0		0	1	0	0
2009	42	1	2	2	2	39.2	1	0	1	0		0	1	0	0
2010	1	1	2	2	1	39.3	1	0	1	0		0	1	0	0
2010	9	1	2	2	1	38.4	1	0	1	0		0	1	0	0
2010	33	1	2	2	2	39.4	1	0	1	0	16	0	1	0	0
2011	10	1	2	2	2	38	1	0	1	0	21	0	1	0	0
2009	26	1.16667	2	2	1	38	1	0	1	0		0	1	0	0
2010	6	1.33333	2	2	1	37.7	1	0	1	0		0	1	0	0
2010	8	1.41667	2	2	1	37.7	1	0	1	0		0	1	0	0
2009	22	1.5	2	2	1	37.6	1	0	1	0		0	1	0	0
2010	7	1.58333	2	2	1	37.6	1	0	1	0		0	1	0	0
2010	8	1.58333	2	2	1	39.7	1	0	1	0		0	1	0	0
2009	21	1.66667	2	2	2	39.2	1	0	1	0		0	1	0	0
2009	41	1.75	2	2	1	38.9	1	0	1	0		0	1	0	0
2010	2	1.91667	2	2	2	40.7	1	0	1	0		0	1	0	0
2009	29	2	2	2	1	38.3	1	0	1	0		0	1	0	0
2009	42	2	2	2	2	40.3	1	0	1	0		0	1	0	0
2010	2	2	2	2	1	37.6	1	0	1	0		0	1	0	0
2010	2	2	2	2	2	39.4	1	0	1	0		0	1	0	0
2010	7	2	2	2	2	40.2	1	0	1	0		0	1	0	0
2010	34	2	2	2	2	39	1	0	1	0		0	1	0	0
2011	8	2	2	2	2	39.1	1	0	1	0	22	0	1	0	0
2009	26	2.5	2	2	2	39.1	1	0	1	0		0	1	0	0
2009	26	2.58333	2	2	2	38	1	0	1	0		0	1	0	0
2009	22	3	2	2	2	39.5	1	0	1	0		0	1	0	0
2009	27	3	2	2	1	37.8	1	0	1	0		0	1	0	0
2009	31	3	2	2	1	38.3	1	0	1	0		0	1	0	0
2009	36	3	2	2	2	39.8	1	0	1	0		0	1	0	0
2009	52	3	2	2	2	38.6	1	0	1	0	12	0	1	0	0
2010	1	3	2	2	2	39.3	1	0	1	0		0	1	0	0
2010	7	3	2	2	1	38.2	1	0	1	0		0	1	0	0
2010	8	3	2	2	2	38.7	1	0	1	0		0	1	0	0
2010	24	3	2	2	2	38.2	1	0	1	0	57	0	1	0	0
2010	33	3	2	2	2	38.9	1	0	1	0	11	0	1	0	0
2011	9	3	2	2	1	38.7	1	0	1	0	7	0	1	0	0
2011	10	3	2	2	1	40.1	1	0	1	0	11	0	1	0	0
2011	10	3	2	2	1	38.4	1	0	1	0	20	0	1	0	0
2009	21	4	2	2	2	38.4	1	0	1	0		0	1	0	0
2009	22	4	2	2	2	38.7	1	0	1	0		0	1	0	0
2010	5	4	2	2	1	38.7	1	0	1	0		0	1	0	0
2010	7	4	2	2	2	38.1	1	0	1	0		0	1	0	0
2010	7	4	2	2	1	37.7	1	0	1	0		0	1	0	0
2010	20	4	2	2	2	38	1	0	1	0	7	0	1	0	0
2011	10	4	2	2	1	38.2	1	0	1	0	18	0	1	0	0
2009	22	5	3	3	1	38.9	1	0	1	0		0	1	0	0
2009	35	5	3	3	2	37.7	1	0	1	0		0	1	0	0
2009	37	5	3	3	2	37.8	1	0	1	0		0	1	0	0
2009	52	5	3	3	1	39.3	1	0	1	0	11	0	1	0	0
2010	6	5	3	3	1	37.7	1	0	1	0		0	1	0	0
2010	2	6	3	3	2	40.7	1	0	1	0		0	1	0	0
2010	3	6	3	3	1	39.7	1	0	1	0		0	1	0	0
2010	3	6	3	3	1	39.7	1	0	1	0		0	1	0	0
2011	20	6	3	3	2	38.3	1	0	1	0		0	1	0	0
2011	8	7	3	3	1	38	1	0	1	0	24	0	1	0	0
2011	10	7	3	3	1	38.6	1	0	1	0	17	0	1	0	0
2009	32	8	3	3	1	38.6	1	0	1	0		0	1	0	0
2011	13	8	3	3	1	38	1	0	1	0		0	1	0	0
2009	23	9	3	3	2	40	1	0	1	0		0	1	0	0
2009	32	9	3	3	2	40.6	1	0	1	0		0	1	0	0
2010	16	9	3	3	2	38.3	1	0	1	0		0	1	0	0
2009	35	10	4	4	2	38.4	1	0	1	0		0	1	0	0
2010	24	10	4	4	2	38.1	1	0	1	0	55	0	1	0	0
2009	35	11	4	4	2	39.2	1	0	1	0		0	1	0	0
2009	33	13	4	4	1	38	1	0	1	0		0	1	0	0
2009	31	16	5	5	1	37.6	1	0	1	0		0	1	0	0
2011	10	16	5	5	2	37.7	1	0	1	0	16	0	1	0	0
2009	33	18	5	5	2	38.3	1	0	1	0		0	1	0	0
2011	6	20	5	6	1	38.2	1	0	1	0	11	0	1	0	0
2009	40	21	5	6	2	37.8	1	0	1	0		0	1	0	0
2010	2	21	5	6	2	38.6	1	0	1	0		0	1	0	0
2009	41	22	5	6	1	37.8	1	0	1	0		0	1	0	0
2009	31	23	5	6	2	37.6	1	0	1	0		0	1	0	0
2010	10	24	5	6	2	37.8	1	0	1	0		0	1	0	0
2010	20	25	5	6	2	37.7	1	0	1	0	10	0	1	0	0
2009	26	27	5	6	1	37.8	1	0	1	0		0	1	0	0
2009	38	28	5	6	2	38.8	1	0	1	0		0	1	0	0
2009	21	29	5	6	1	38	1	0	1	0		0	1	0	0
2009	29	30	5	7	1	38.9	1	0	1	0		0	1	0	0
2010	3	30	5	7	1	37.7	1	0	1	0		0	1	0	0
2010	23	32	5	7	2	37.7	1	0	1	0	42	0	1	0	0
2010	6	35	5	7	1	38.9	1	0	1	0		0	1	0	0
2009	35	36	5	7	2	38.1	1	0	1	0		0	1	0	0
2010	6	36	5	7	2	37.9	1	0	1	0		0	1	0	0
2010	20	38	5	7	2	38	1	0	1	0	12	0	1	0	0
2010	2	39	5	7	1	37.9	1	0	1	0		0	1	0	0
2011	8	39	5	7	2	38.6	1	0	1	0	29	0	1	0	0
2009	23	40	6	7	2	37.9	1	0	1	0		0	1	0	0
2009	36	42	6	7	1	37.7	1	0	1	0		0	1	0	0
2009	38	42	6	7	2	38	1	0	1	0		0	1	0	0
2010	33	48	6	7	2	38.9	1	0	1	0	2	0	1	0	0
2009	22	50	6	8	2	37.7	1	0	1	0		0	1	0	0
2009	40	52	6	8	2	37.7	1	0	1	0		0	1	0	0
2010	4	52	6	8	2	37.9	1	0	1	0		0	1	0	0
2009	43	55	6	8	2	37.6	1	0	1	0		0	1	0	0
2010	2	65	6	8	2	38.7	1	0	1	0		0	1	0	0
2010	1	66	6	8	2	37.7	1	0	1	0		0	1	0	0
2010	3	66	6	8	2	37.9	1	0	1	0		0	1	0	0
2009	26	73	6	8	2	37.7	1	0	1	0		0	1	0	0
2009	32	2	2	2	1	38.4	1	0	0	1		0	1	0	0
2009	26	3	2	2	1	40.5	1	0	0	1		0	1	0	0
2009	34	3	2	2	2	39.4	1	0	0	1		0	1	0	0
2010	2	3	2	2	2	37.9	1	0	0	1		0	1	0	0
2010	8	3	2	2	1	39.2	1	0	0	1		0	1	0	0
2009	25	4	2	2	1	38.9	1	0	0	1		0	1	0	0
2009	26	4	2	2	1	39.2	1	0	0	1		0	1	0	0
2009	26	4	2	2	2	38.5	1	0	0	1		0	1	0	0
2011	8	4	2	2	1	38	1	0	0	1	27	0	1	0	0
2009	22	5	3	3	2	38.2	1	0	0	1		0	1	0	0
2011	7	5	3	3	1	38	1	0	0	1	17	0	1	0	0
2010	2	7	3	3	1	37.8	1	0	0	1		0	1	0	0
2009	36	8	3	3	1	38.5	1	0	0	1		0	1	0	0
2010	3	9	3	3	2	37.8	1	0	0	1		0	1	0	0
2010	10	9	3	3	2	38.4	1	0	0	1		0	1	0	0
2010	3	10	4	4	2	38.4	1	0	0	1		0	1	0	0
2010	7	10	4	4	2	38.4	1	0	0	1		0	1	0	0
2011	7	10	4	4	2	38.5	1	0	0	1	18	0	1	0	0
2010	25	14	4	4	2	39.5	1	0	0	1	72	0	1	0	0
2009	43	17	5	5	1	39.8	1	0	0	1		0	1	0	0
2009	31	18	5	5	1	38.5	1	0	0	1		0	1	0	0
2010	6	20	5	6	1	37.8	1	0	0	1		0	1	0	0
2009	32	21	5	6	1	39.4	1	0	0	1		0	1	0	0
2010	25	22	5	6	2	38.5	1	0	0	1	66	0	1	0	0
2011	5	22	5	6	1	38.8	1	0	0	1	10	0	1	0	0
2009	31	23	5	6	2	39.5	1	0	0	1		0	1	0	0
2009	36	25	5	6	1	38.3	1	0	0	1		0	1	0	0
2010	6	25	5	6	2	37.7	1	0	0	1		0	1	0	0
2009	31	27	5	6	2	38.5	1	0	0	1		0	1	0	0
2009	27	28	5	6	2	38.7	1	0	0	1		0	1	0	0
2011	9	30	5	7	2	38.2	1	0	0	1	1	0	1	0	0
2010	3	49	6	7	2	38.4	1	0	0	1		0	1	0	0
2010	2	54	6	8	2	37.7	1	0	0	1		0	1	0	0
2009	31	66	6	8	2	39.1	1	0	0	1		0	1	0	0
2010	1	68	6	8	2	37.6	1	0	0	1		0	1	0	0
2009	31	75	6	8	2	37.7	1	0	0	1		0	1	0	0
2010	14	0.416667	1	1	1	38.2	1	0	1	0	pf-	0	1	0	1
2010	16	0.416667	1	1	1	38.9	1	0	1	0	tr(-)	0	1	0	1
2010	16	0.5	1	1	1	38.2	1	0	1	0	tr(-)	0	1	0	1
2010	10	1.41667	2	2	2	40	1	0	1	0	pf-	0	1	0	1
2010	16	1.75	2	2	1	38	1	0	1	0	tr(-)	0	1	0	1
2009	41	2	2	2	1	38.7	1	0	1	0	pf-	0	1	0	1
2010	18	3	2	2	2	37.8	1	0	1	0	pf-	0	1	0	1
2010	14	4	2	2	1	38.5	1	0	1	0	pf-	0	1	0	1
2010	15	7	3	3	1	39.4	1	0	1	0	pf-	0	1	0	1
2010	39	9	3	3	1	37.7	1	0	1	0	pf-	0	1	0	1
2010	9	10	4	4	2	38.2	1	0	1	0	pf-	0	1	0	1
2010	11	16	5	5	1	37.7	1	0	1	0	pf-	0	1	0	1
2011	12	17	5	5	1	38.8	1	0	1	0	pf-	0	1	0	1
2009	24	20	5	6	2	37.7	1	0	1	0	pf-	0	1	0	1
2009	41	27	5	6	2	37.6	1	0	1	0	pf-	0	1	0	1
2011	11	28	5	6	2	39	1	0	1	0	pf-	0	1	0	1
2010	14	31	5	7	2	39.8	1	0	1	0	pf-	0	1	0	1
2009	23	32	5	7	2	37.8	1	0	1	0	pf-	0	1	0	1
2010	37	32	5	7	2	38.7	1	0	1	0	pf-	0	1	0	1
2009	41	34	5	7	1	39.7	1	0	1	0	pf-	0	1	0	1
2010	23	36	5	7	2	37.9	1	0	1	0	Nse	0	1	0	1
2010	17	38	5	7	2	40	1	0	1	0	tr(-)	0	1	0	1
2009	41	41	6	7	2	38.1	1	0	1	0	pf-	0	1	0	1
2010	16	41	6	7	1	37.7	1	0	1	0	tr(-)	0	1	0	1
2009	41	45	6	7	1	38.1	1	0	1	0	pf-	0	1	0	1
2010	22	52	6	8	2	39.7	1	0	1	0	Nse	0	1	0	1
2010	22	53	6	8	2	37.9	1	0	1	0	pf-	0	1	0	1
2010	22	53	6	8	2	37.9	1	0	1	0	pf-	0	1	0	1
2009	22	58	6	8	1	38.4	1	0	1	0	pf-	0	1	0	1
2010	10	70	6	8	2	40	1	0	1	0	pf-	0	1	0	1
2010	31	1.58333	2	2	2	38.5	1	0	0	1	pf-	0	1	0	1
2010	9	5	3	3	1	38.9	1	0	0	1	pf-	0	1	0	1
2010	23	5	3	3	2	38.3	1	0	0	1	Nse	0	1	0	1
2009	41	7	3	3	2	38.4	1	0	0	1	pf-	0	1	0	1
2010	16	8	3	3	2	37.7	1	0	0	1	tr(-)	0	1	0	1
2010	23	8	3	3	1	38.3	1	0	0	1	Nse	0	1	0	1
2010	12	8	3	3	2	38.1	1	0	0	1	pf-	0	1	0	1
2010	9	10	4	4	1	38.3	1	0	0	1	pf-	0	1	0	1
2010	31	12	4	4	2	37.8	1	0	0	1	pf-	0	1	0	1
2009	22	30	5	7	2	37.9	1	0	0	1	pf-	0	1	0	1
2010	36	39	5	7	2	37.9	1	0	0	1	pf-	0	1	0	1
2010	37	39	5	7	2	37.8	1	0	0	1	pf-	0	1	0	1
2010	25	45	6	7	1	38	1	0	0	0		1	0	0	0
2009	26	0.0833333	1	1	2	37.7	1	0	1	0		1	0	0	0
2010	8	0.0833333	1	1	1	38	1	0	1	0		1	0	0	0
2010	17	0.0833333	1	1	2	37.6	1	0	1	0		1	0	0	0
2009	48	0.25	1	1	2	38.7	1	0	1	0		1	0	0	0
2010	19	0.25	1	1	1	37.7	1	0	1	0		1	0	0	0
2011	16	0.25	1	1	1	37.6	1	0	1	0		1	0	0	0
2009	39	0.416667	1	1	2	38.2	1	0	1	0		1	0	0	0
2010	31	0.416667	1	1	1	41.3	1	0	1	0		1	0	0	0
2010	33	0.416667	1	1	1	37.6	1	0	1	0		1	0	0	0
2010	34	0.5	1	1	1	39.2	1	0	1	0		1	0	0	0
2011	9	0.5	1	1	2	39.5	1	0	1	0		1	0	0	0
2009	21	0.583333	1	1	1	37.6	1	0	1	0		1	0	0	0
2010	18	0.583333	1	1	1	37.6	1	0	1	0		1	0	0	0
2010	22	0.583333	1	1	2	40.3	1	0	1	0		1	0	0	0
2011	8	0.583333	1	1	1	38.7	1	0	1	0		1	0	0	0
2011	19	0.583333	1	1	1	39.8	1	0	1	0		1	0	0	0
2010	28	0.666667	1	1	2	39.1	1	0	1	0		1	0	0	0
2011	18	0.666667	1	1	1	39.2	1	0	1	0		1	0	0	0
2011	20	0.666667	1	1	1	38.3	1	0	1	0		1	0	0	0
2010	32	0.75	1	1	2	40.1	1	0	1	0		1	0	0	0
2010	24	0.833333	1	1	1	39.2	1	0	1	0		1	0	0	0
2011	6	0.833333	1	1	1	37.8	1	0	1	0		1	0	0	0
2011	20	0.833333	1	1	1	37.8	1	0	1	0		1	0	0	0
2010	6	1	2	2	1	37.8	1	0	1	0		1	0	0	0
2010	34	1	2	2	1	38	1	0	1	0		1	0	0	0
2011	10	1	2	2	2	39.7	1	0	1	0		1	0	0	0
2011	20	1	2	2	2	40.2	1	0	1	0		1	0	0	0
2010	34	1.08333	2	2	1	37.7	1	0	1	0		1	0	0	0
2010	17	1.16667	2	2	2	39	1	0	1	0		1	0	0	0
2010	27	1.33333	2	2	2	38.9	1	0	1	0		1	0	0	0
2010	22	1.41667	2	2	1	39.1	1	0	1	0		1	0	0	0
2009	26	1.5	2	2	1	39.2	1	0	1	0		1	0	0	0
2010	21	1.5	2	2	1	38.4	1	0	1	0		1	0	0	0
2011	21	1.58333	2	2	2	39.2	1	0	1	0		1	0	0	0
2009	27	1.66667	2	2	2	39.7	1	0	1	0		1	0	0	0
2010	22	1.66667	2	2	1	39.5	1	0	1	0		1	0	0	0
2010	15	1.75	2	2	1	40.1	1	0	1	0		1	0	0	0
2011	16	1.75	2	2	1	37.8	1	0	1	0		1	0	0	0
2010	7	1.83333	2	2	2	38.3	1	0	1	0		1	0	0	0
2010	14	1.83333	2	2	1	38.7	1	0	1	0		1	0	0	0
2010	21	1.83333	2	2	2	38.1	1	0	1	0		1	0	0	0
2011	11	1.83333	2	2	1	38	1	0	1	0		1	0	0	0
2009	52	2	2	2	2	38	1	0	1	0		1	0	0	0
2010	17	2	2	2	1	38.1	1	0	1	0		1	0	0	0
2010	18	2	2	2	1	38.5	1	0	1	0		1	0	0	0
2010	19	2	2	2	2	37.8	1	0	1	0		1	0	0	0
2010	20	2	2	2	1	38.3	1	0	1	0		1	0	0	0
2010	22	2	2	2	2	41.2	1	0	1	0		1	0	0	0
2010	22	2	2	2	2	40.1	1	0	1	0		1	0	0	0
2010	22	2	2	2	2	38.3	1	0	1	0		1	0	0	0
2010	22	2	2	2	1	38.1	1	0	1	0		1	0	0	0
2010	23	2	2	2	1	40.4	1	0	1	0		1	0	0	0
2010	23	2	2	2	2	38.5	1	0	1	0		1	0	0	0
2010	12	2	2	2	2	39.1	1	0	1	0		1	0	0	0
2010	22	2	2	2	2	41.1	1	0	1	0		1	0	0	0
2010	22	2	2	2	2	40.1	1	0	1	0		1	0	0	0
2011	8	2	2	2	2	38.7	1	0	1	0		1	0	0	0
2011	10	2	2	2	2	39.4	1	0	1	0		1	0	0	0
2011	14	2	2	2	1	38	1	0	1	0		1	0	0	0
2011	16	2	2	2	1	38.3	1	0	1	0		1	0	0	0
2011	16	2	2	2	2	38	1	0	1	0		1	0	0	0
2011	19	2	2	2	2	38	1	0	1	0		1	0	0	0
2011	21	2	2	2	1	38.9	1	0	1	0		1	0	0	0
2010	16	2.33333	2	2	1	38.6	1	0	1	0		1	0	0	0
2010	8	3	2	2	2	37.8	1	0	1	0		1	0	0	0
2010	19	3	2	2	2	39.2	1	0	1	0		1	0	0	0
2010	19	3	2	2	2	39.4	1	0	1	0		1	0	0	0
2010	24	3	2	2	1	38.5	1	0	1	0		1	0	0	0
2010	24	3	2	2	1	40	1	0	1	0		1	0	0	0
2010	12	3	2	2	2	37.8	1	0	1	0		1	0	0	0
2010	29	3	2	2	2	38.2	1	0	1	0		1	0	0	0
2011	10	3	2	2	2	39.7	1	0	1	0		1	0	0	0
2011	10	3	2	2	2	38	1	0	1	0		1	0	0	0
2011	14	3	2	2	1	39.1	1	0	1	0		1	0	0	0
2009	22	4	2	2	2	38.7	1	0	1	0		1	0	0	0
2010	19	4	2	2	1	38.5	1	0	1	0		1	0	0	0
2010	19	4	2	2	2	37.7	1	0	1	0		1	0	0	0
2010	20	4	2	2	1	39.9	1	0	1	0		1	0	0	0
2010	20	4	2	2	1	39.3	1	0	1	0		1	0	0	0
2010	20	4	2	2	1	38.7	1	0	1	0		1	0	0	0
2010	20	4	2	2	1	38.4	1	0	1	0		1	0	0	0
2010	22	4	2	2	2	39.8	1	0	1	0		1	0	0	0
2010	22	4	2	2	1	41.1	1	0	1	0		1	0	0	0
2010	22	4	2	2	1	38.3	1	0	1	0		1	0	0	0
2010	22	4	2	2	2	37.9	1	0	1	0		1	0	0	0
2010	23	4	2	2	2	37.9	1	0	1	0		1	0	0	0
2010	23	4	2	2	1	37.8	1	0	1	0		1	0	0	0
2010	11	4	2	2	2	39.6	1	0	1	0		1	0	0	0
2010	21	4	2	2	2	37.7	1	0	1	0		1	0	0	0
2011	8	4	2	2	1	38.9	1	0	1	0		1	0	0	0
2011	10	4	2	2	2	38.9	1	0	1	0		1	0	0	0
2011	20	4	2	2	1	39	1	0	1	0		1	0	0	0
2009	22	5	3	3	2	37.7	1	0	1	0		1	0	0	0
2010	20	5	3	3	1	39.8	1	0	1	0		1	0	0	0
2010	22	5	3	3	2	38.2	1	0	1	0		1	0	0	0
2010	24	5	3	3	2	37.8	1	0	1	0		1	0	0	0
2011	13	5	3	3	1	38.3	1	0	1	0		1	0	0	0
2011	16	5	3	3	1	39.2	1	0	1	0		1	0	0	0
2011	16	5	3	3	1	37.9	1	0	1	0		1	0	0	0
2010	9	6	3	3	1	37.6	1	0	1	0		1	0	0	0
2010	13	6	3	3	1	37.9	1	0	1	0		1	0	0	0
2011	21	6	3	3	2	38.3	1	0	1	0		1	0	0	0
2010	7	7	3	3	2	37.9	1	0	1	0		1	0	0	0
2010	15	7	3	3	1	37.9	1	0	1	0		1	0	0	0
2010	17	7	3	3	2	38.3	1	0	1	0		1	0	0	0
2010	22	7	3	3	2	40.3	1	0	1	0		1	0	0	0
2010	13	7	3	3	1	39.7	1	0	1	0		1	0	0	0
2010	21	7	3	3	1	38.9	1	0	1	0		1	0	0	0
2010	22	7	3	3	2	38.1	1	0	1	0		1	0	0	0
2009	34	8	3	3	2	39.3	1	0	1	0		1	0	0	0
2009	52	8	3	3	2	38.1	1	0	1	0		1	0	0	0
2010	16	8	3	3	1	38.5	1	0	1	0		1	0	0	0
2010	18	8	3	3	1	38.6	1	0	1	0		1	0	0	0
2010	24	8	3	3	1	37.6	1	0	1	0		1	0	0	0
2009	40	9	3	3	1	37.8	1	0	1	0		1	0	0	0
2010	15	9	3	3	2	38.1	1	0	1	0		1	0	0	0
2010	15	9	3	3	2	38.1	1	0	1	0		1	0	0	0
2009	25	10	4	4	2	37.9	1	0	1	0		1	0	0	0
2010	12	10	4	4	1	38.7	1	0	1	0		1	0	0	0
2009	22	11	4	4	2	38.1	1	0	1	0		1	0	0	0
2009	22	11	4	4	2	38	1	0	1	0		1	0	0	0
2010	23	11	4	4	2	37.6	1	0	1	0		1	0	0	0
2010	17	12	4	4	2	39.9	1	0	1	0		1	0	0	0
2010	22	12	4	4	2	38.3	1	0	1	0		1	0	0	0
2010	26	12	4	4	1	37.8	1	0	1	0		1	0	0	0
2010	26	12	4	4	1	37.8	1	0	1	0		1	0	0	0
2010	10	13	4	4	1	37.8	1	0	1	0		1	0	0	0
2011	12	13	4	4	1	38	1	0	1	0		1	0	0	0
2010	8	14	4	4	1	38.6	1	0	1	0		1	0	0	0
2010	20	14	4	4	1	38.1	1	0	1	0		1	0	0	0
2010	25	14	4	4	2	38.8	1	0	1	0		1	0	0	0
2010	42	15	5	5	2	37.8	1	0	1	0		1	0	0	0
2011	14	15	5	5	2	37.7	1	0	1	0		1	0	0	0
2009	31	18	5	5	2	37.7	1	0	1	0		1	0	0	0
2009	42	18	5	5	1	37.7	1	0	1	0		1	0	0	0
2010	21	18	5	5	1	38.2	1	0	1	0		1	0	0	0
2009	51	19	5	5	2	37.7	1	0	1	0		1	0	0	0
2010	6	19	5	5	2	37.8	1	0	1	0		1	0	0	0
2010	12	19	5	5	2	37.7	1	0	1	0		1	0	0	0
2009	34	21	5	6	1	38.4	1	0	1	0		1	0	0	0
2010	26	21	5	6	2	37.6	1	0	1	0		1	0	0	0
2011	11	21	5	6	2	37.7	1	0	1	0		1	0	0	0
2010	6	22	5	6	2	37.7	1	0	1	0		1	0	0	0
2010	26	22	5	6	2	38.6	1	0	1	0		1	0	0	0
2009	23	23	5	6	2	40.1	1	0	1	0		1	0	0	0
2010	14	23	5	6	2	38.9	1	0	1	0		1	0	0	0
2010	14	23	5	6	2	37.7	1	0	1	0		1	0	0	0
2010	17	23	5	6	2	38.1	1	0	1	0		1	0	0	0
2009	24	24	5	6	2	37.9	1	0	1	0		1	0	0	0
2010	23	25	5	6	2	37.9	1	0	1	0		1	0	0	0
2010	24	25	5	6	1	38	1	0	1	0		1	0	0	0
2010	25	25	5	6	2	37.8	1	0	1	0		1	0	0	0
2010	36	25	5	6	2	37.9	1	0	1	0		1	0	0	0
2010	26	26	5	6	1	38	1	0	1	0		1	0	0	0
2009	22	28	5	6	2	37.8	1	0	1	0		1	0	0	0
2011	18	28	5	6	2	38.9	1	0	1	0		1	0	0	0
2011	12	30	5	7	2	38	1	0	1	0		1	0	0	0
2010	27	31	5	7	1	38	1	0	1	0		1	0	0	0
2010	19	32	5	7	2	38.1	1	0	1	0		1	0	0	0
2009	52	38	5	7	2	37.7	1	0	1	0		1	0	0	0
2010	16	40	6	7	2	38.4	1	0	1	0		1	0	0	0
2010	24	40	6	7	2	38	1	0	1	0		1	0	0	0
2011	7	40	6	7	1	38.7	1	0	1	0		1	0	0	0
2010	22	42	6	7	2	37.9	1	0	1	0		1	0	0	0
2010	21	42	6	7	2	37.6	1	0	1	0		1	0	0	0
2010	26	45	6	7	2	38.7	1	0	1	0		1	0	0	0
2010	35	45	6	7	2	37.7	1	0	1	0		1	0	0	0
2011	10	45	6	7	2	37.6	1	0	1	0		1	0	0	0
2010	17	46	6	7	2	39.3	1	0	1	0		1	0	0	0
2010	17	46	6	7	1	38.1	1	0	1	0		1	0	0	0
2009	34	47	6	7	1	37.9	1	0	1	0		1	0	0	0
2010	23	47	6	7	1	39.7	1	0	1	0		1	0	0	0
2010	22	48	6	7	1	38	1	0	1	0		1	0	0	0
2011	11	48	6	7	2	37.8	1	0	1	0		1	0	0	0
2009	26	50	6	8	2	37.8	1	0	1	0		1	0	0	0
2010	9	52	6	8	2	37.7	1	0	1	0		1	0	0	0
2011	11	52	6	8	2	37.7	1	0	1	0		1	0	0	0
2010	12	54	6	8	1	37.8	1	0	1	0		1	0	0	0
2009	31	58	6	8	2	37.6	1	0	1	0		1	0	0	0
2010	2	58	6	8	2	37.9	1	0	1	0		1	0	0	0
2010	18	58	6	8	2	37.8	1	0	1	0		1	0	0	0
2010	22	59	6	8	1	38.7	1	0	1	0		1	0	0	0
2010	26	59	6	8	1	38.5	1	0	1	0		1	0	0	0
2009	22	60	6	8	1	38	1	0	1	0		1	0	0	0
2011	14	65	6	8	1	37.9	1	0	1	0		1	0	0	0
2010	36	68	6	8	2	38.7	1	0	1	0		1	0	0	0
2010	23	0.583333	1	1	2	39.4	1	0	0	1		1	0	0	0
2011	8	0.75	1	1	1	37.7	1	0	0	1		1	0	0	0
2010	23	1	2	2	2	38.3	1	0	0	1		1	0	0	0
2009	30	1.58333	2	2	2	37.8	1	0	0	1		1	0	0	0
2010	3	2	2	2	1	39.4	1	0	0	1		1	0	0	0
2011	6	2	2	2	2	37.8	1	0	0	1		1	0	0	0
2011	16	2	2	2	2	38.8	1	0	0	1		1	0	0	0
2010	16	3.41667	2	2	2	39.6	1	0	0	1		1	0	0	0
2010	22	4	2	2	2	39.8	1	0	0	1		1	0	0	0
2010	13	5	3	3	1	38.8	1	0	0	1		1	0	0	0
2011	10	5	3	3	1	38	1	0	0	1		1	0	0	0
2009	30	6	3	3	2	37.7	1	0	0	1		1	0	0	0
2010	3	6	3	3	1	37.9	1	0	0	1		1	0	0	0
2010	17	6	3	3	1	39.8	1	0	0	1		1	0	0	0
2010	24	6	3	3	1	38.8	1	0	0	1		1	0	0	0
2010	12	6	3	3	1	37.8	1	0	0	1		1	0	0	0
2010	21	6	3	3	1	38.4	1	0	0	1		1	0	0	0
2010	26	7	3	3	1	38.5	1	0	0	1		1	0	0	0
2009	42	8	3	3	1	38.1	1	0	0	1		1	0	0	0
2010	14	8	3	3	2	37.7	1	0	0	1		1	0	0	0
2010	24	9	3	3	2	38.4	1	0	0	1		1	0	0	0
2011	18	9	3	3	1	37.7	1	0	0	1		1	0	0	0
2010	15	10	4	4	2	38.9	1	0	0	1		1	0	0	0
2010	17	10	4	4	1	37.7	1	0	0	1		1	0	0	0
2010	8	12	4	4	1	37.9	1	0	0	1		1	0	0	0
2010	11	12	4	4	2	38.1	1	0	0	1		1	0	0	0
2010	22	12	4	4	2	37.9	1	0	0	1		1	0	0	0
2010	24	12	4	4	1	38	1	0	0	1		1	0	0	0
2010	23	13	4	4	1	37.6	1	0	0	1		1	0	0	0
2010	29	13	4	4	1	37.7	1	0	0	1		1	0	0	0
2010	8	14	4	4	2	37.7	1	0	0	1		1	0	0	0
2010	24	14	4	4	2	37.8	1	0	0	1		1	0	0	0
2010	24	14	4	4	2	37.8	1	0	0	1		1	0	0	0
2010	2	16	5	5	1	38.3	1	0	0	1		1	0	0	0
2010	14	17	5	5	2	37.7	1	0	0	1		1	0	0	0
2011	6	18	5	5	2	37.8	1	0	0	1		1	0	0	0
2010	24	20	5	6	1	38	1	0	0	1		1	0	0	0
2009	22	23	5	6	2	37.9	1	0	0	1		1	0	0	0
2009	39	25	5	6	2	37.7	1	0	0	1		1	0	0	0
2009	48	26	5	6	2	38.7	1	0	0	1		1	0	0	0
2009	52	31	5	7	2	37.7	1	0	0	1		1	0	0	0
2009	31	32	5	7	1	38.5	1	0	0	1		1	0	0	0
2009	26	39	5	7	2	37.7	1	0	0	1		1	0	0	0
2010	2	44	6	7	2	37.8	1	0	0	1		1	0	0	0
2010	26	45	6	7	2	37.9	1	0	0	1		1	0	0	0
2010	12	53	6	8	2	37.8	1	0	0	1		1	0	0	0
2009	31	55	6	8	1	38.5	1	0	0	1		1	0	0	0
2010	12	55	6	8	1	37.8	1	0	0	1		1	0	0	0
2009	33	56	6	8	2	37.7	1	0	0	1		1	0	0	0
2010	34	69	6	8	1	37.6	1	0	0	1		1	0	0	0
2009	34	73	6	8	2	39.9	1	0	0	1		1	0	0	0
2010	37	1.5	2	2	1	36.7	0	1	0	0	pf+	0	1	1	0
2010	42	0.5	1	1	1		0	0	1	0	pf+	0	1	1	0
2010	43	0.583333	1	1	1		0	0	1	0	pf+	0	1	1	0
2011	16	0.583333	1	1	2		0	0	1	0	pf+	0	1	1	0
2010	50	0.666667	1	1	2		0	0	1	0	pf1	0	1	1	0
2010	30	0.75	1	1	1		0	0	1	0	pf+	0	1	1	0
2010	28	0.833333	1	1	2		0	0	1	0	pf+	0	1	1	0
2010	42	1	2	2	1		0	0	1	0	pf+	0	1	1	0
2010	47	1	2	2	1		0	0	1	0	pf+	0	1	1	0
2010	47	1	2	2	1		0	0	1	0	pf+	0	1	1	0
2010	43	1.33333	2	2	2		0	0	1	0	pf+	0	1	1	0
2010	47	1.41667	2	2	2		0	0	1	0	pf1	0	1	1	0
2010	47	2	2	2	2		0	0	1	0	pf1	0	1	1	0
2010	50	2	2	2	1		0	0	1	0	pf1	0	1	1	0
2010	50	2	2	2	1		0	0	1	0	pf1	0	1	1	0
2010	30	2	2	2	2		0	0	1	0	pf+	0	1	1	0
2011	2	2	2	2	2		0	0	1	0	pf2	0	1	1	0
2011	15	2	2	2	1		0	0	1	0	pf+	0	1	1	0
2011	15	2	2	2	1		0	0	1	0	pf+	0	1	1	0
2011	19	2	2	2	1		0	0	1	0	pf+	0	1	1	0
2010	51	2.16667	2	2	1		0	0	1	0	PF1	0	1	1	0
2010	51	2.33333	2	2	2		0	0	1	0	PF1	0	1	1	0
2010	31	3	2	2	2		0	0	1	0	pf+	0	1	1	0
2010	42	3	2	2	2		0	0	1	0	pf+	0	1	1	0
2010	44	3	2	2	1		0	0	1	0	pf+	0	1	1	0
2010	29	3	2	2	1		0	0	1	0	pf+	0	1	1	0
2011	19	3	2	2	1		0	0	1	0	pf+	0	1	1	0
2010	44	4	2	2	2		0	0	1	0	pf+	0	1	1	0
2011	2	4	2	2	1		0	0	1	0	pf2	0	1	1	0
2011	3	4	2	2	2		0	0	1	0	PF1	0	1	1	0
2011	18	4	2	2	2		0	0	1	0	pf+	0	1	1	0
2010	38	5	3	3	2		0	0	1	0	pf+	0	1	1	0
2010	44	5	3	3	2		0	0	1	0	pf+	0	1	1	0
2011	12	5	3	3	2		0	0	1	0	pf+	0	1	1	0
2011	18	5	3	3	1		0	0	1	0	pf+	0	1	1	0
2010	47	6	3	3	2		0	0	1	0	pf1	0	1	1	0
2010	42	7	3	3	2		0	0	1	0	pf+	0	1	1	0
2010	44	7	3	3	1		0	0	1	0	pf+	0	1	1	0
2010	45	7	3	3	2		0	0	1	0	pf+	0	1	1	0
2010	29	7	3	3	1		0	0	1	0	pf+	0	1	1	0
2009	25	8	3	3	1	33.8	0	0	1	0	pf+	0	1	1	0
2010	52	8	3	3	2		0	0	1	0	PF1	0	1	1	0
2011	11	8	3	3	2		0	0	1	0	PF1	0	1	1	0
2011	18	8	3	3	1		0	0	1	0	pf+	0	1	1	0
2009	19	9	3	3	1	34.3	0	0	1	0	pf+	0	1	1	0
2010	28	9	3	3	2		0	0	1	0	pf+	0	1	1	0
2010	45	10	4	4	2		0	0	1	0	pf+	0	1	1	0
2010	51	10	4	4	1		0	0	1	0	PF1	0	1	1	0
2010	29	10	4	4	2		0	0	1	0	pf+	0	1	1	0
2010	17	11	4	4	1		0	0	1	0	tr(+)	0	1	1	0
2010	38	11	4	4	2		0	0	1	0	pf+	0	1	1	0
2010	40	11	4	4	2		0	0	1	0	pf+	0	1	1	0
2011	18	11	4	4	2		0	0	1	0	pf+	0	1	1	0
2010	44	12	4	4	2		0	0	1	0	pf+	0	1	1	0
2011	16	12	4	4	1		0	0	1	0	pf+	0	1	1	0
2011	16	12	4	4	2		0	0	1	0	pf+	0	1	1	0
2011	18	12	4	4	2		0	0	1	0	pf+	0	1	1	0
2010	46	13	4	4	2		0	0	1	0	pf+	0	1	1	0
2011	1	13	4	4	2		0	0	1	0	PF1	0	1	1	0
2010	29	14	4	4	2		0	0	1	0	pf+	0	1	1	0
2011	16	14	4	4	1		0	0	1	0	pf+	0	1	1	0
2010	49	15	5	5	1		0	0	1	0	PF1	0	1	1	0
2011	13	15	5	5	1		0	0	1	0	pf+	0	1	1	0
2010	31	16	5	5	2		0	0	1	0	pf+	0	1	1	0
2011	14	16	5	5	1		0	0	1	0	pf+	0	1	1	0
2010	31	17	5	5	1		0	0	1	0	pf+	0	1	1	0
2011	14	17	5	5	2		0	0	1	0	pf+	0	1	1	0
2009	24	18	5	5	2	34.9	0	0	1	0	pf+	0	1	1	0
2009	45	18	5	5	2	34.9	0	0	1	0	pf+	0	1	1	0
2010	43	18	5	5	2		0	0	1	0	pf+	0	1	1	0
2011	1	18	5	5	2		0	0	1	0	PF1	0	1	1	0
2010	43	20	5	6	1		0	0	1	0	pf+	0	1	1	0
2010	47	20	5	6	1		0	0	1	0	pf+	0	1	1	0
2011	14	20	5	6	1		0	0	1	0	pf+	0	1	1	0
2011	14	21	5	6	2		0	0	1	0	pf+	0	1	1	0
2010	48	22	5	6	1		0	0	1	0	pf1	0	1	1	0
2010	28	22	5	6	2		0	0	1	0	pf+	0	1	1	0
2010	42	23	5	6	1		0	0	1	0	pf+	0	1	1	0
2010	50	23	5	6	1		0	0	1	0	pf1	0	1	1	0
2011	14	23	5	6	2		0	0	1	0	pf+	0	1	1	0
2010	38	24	5	6	2		0	0	1	0	pf+	0	1	1	0
2010	47	24	5	6	1		0	0	1	0	pf+	0	1	1	0
2010	48	25	5	6	2		0	0	1	0	PF1	0	1	1	0
2010	51	25	5	6	2		0	0	1	0	PF1	0	1	1	0
2011	3	25	5	6	1		0	0	1	0	PF1	0	1	1	0
2011	14	25	5	6	2		0	0	1	0	pf+	0	1	1	0
2011	18	25	5	6	2		0	0	1	0	pf+	0	1	1	0
2010	51	26	5	6	1		0	0	1	0	pf1	0	1	1	0
2011	14	26	5	6	1		0	0	1	0	pf+	0	1	1	0
2010	37	27	5	6	1		0	0	1	0	pf+	0	1	1	0
2010	46	28	5	6	2		0	0	1	0	pf+	0	1	1	0
2010	49	28	5	6	1		0	0	1	0	PF1	0	1	1	0
2010	51	28	5	6	2		0	0	1	0	pf1	0	1	1	0
2011	16	28	5	6	2		0	0	1	0	pf+	0	1	1	0
2010	40	29	5	6	2		0	0	1	0	pf+	0	1	1	0
2011	1	29	5	6	2		0	0	1	0	PF1	0	1	1	0
2010	44	30	5	7	2		0	0	1	0	pf+	0	1	1	0
2010	46	30	5	7	2		0	0	1	0	pf+	0	1	1	0
2009	23	32	5	7	2	33.2	0	0	1	0	pf+	0	1	1	0
2010	44	32	5	7	2		0	0	1	0	pf+	0	1	1	0
2010	45	34	5	7	2		0	0	1	0	pf+	0	1	1	0
2011	15	34	5	7	2		0	0	1	0	pf+	0	1	1	0
2010	41	35	5	7	2		0	0	1	0	pf+	0	1	1	0
2010	48	36	5	7	2		0	0	1	0	pf1	0	1	1	0
2010	50	37	5	7	1		0	0	1	0	pf1	0	1	1	0
2010	46	38	5	7	2		0	0	1	0	pf+	0	1	1	0
2010	47	38	5	7	1		0	0	1	0	pf+	0	1	1	0
2011	11	39	5	7	2		0	0	1	0	PF1	0	1	1	0
2010	16	40	6	7	2		0	0	1	0	pf+	0	1	1	0
2010	17	40	6	7	1		0	0	1	0	tr(+)	0	1	1	0
2011	13	40	6	7	1		0	0	1	0	pf+	0	1	1	0
2010	49	42	6	7	2		0	0	1	0	PF1	0	1	1	0
2010	52	43	6	7	2		0	0	1	0	PF1	0	1	1	0
2010	38	44	6	7	1		0	0	1	0	pf+	0	1	1	0
2010	45	44	6	7	1		0	0	1	0	pf+	0	1	1	0
2010	41	45	6	7	1		0	0	1	0	pf+	0	1	1	0
2011	14	45	6	7	2		0	0	1	0	pf+	0	1	1	0
2011	18	48	6	7	2		0	0	1	0	pf+	0	1	1	0
2009	25	50	6	8	2	34.7	0	0	1	0	pf+	0	1	1	0
2010	31	50	6	8	1		0	0	1	0	pf+	0	1	1	0
2010	30	52	6	8	2		0	0	1	0	pf+	0	1	1	0
2011	2	52	6	8	2		0	0	1	0	PF1	0	1	1	0
2011	14	54	6	8	1		0	0	1	0	pf+	0	1	1	0
2010	52	59	6	8	1		0	0	1	0	PF1	0	1	1	0
2010	47	60	6	8	1		0	0	1	0	pf+	0	1	1	0
2010	28	60	6	8	1		0	0	1	0	pf+	0	1	1	0
2010	30	60	6	8	1		0	0	1	0	pf+	0	1	1	0
2010	47	61	6	8	2		0	0	1	0	pf+	0	1	1	0
2010	47	64	6	8	2		0	0	1	0	pf1	0	1	1	0
2010	43	66	6	8	1		0	0	1	0	pf+	0	1	1	0
2011	2	66	6	8	2		0	0	1	0	pf2	0	1	1	0
2011	18	66	6	8	2		0	0	1	0	pf+	0	1	1	0
2010	30	67	6	8	2		0	0	1	0	pf+	0	1	1	0
2010	43	67	6	8	2		0	0	1	0	pf+	0	1	1	0
2010	40	73	6	8	1		0	0	1	0	pf+	0	1	1	0
2011	12	79	6	8	2		0	0	1	0	pf+	0	1	1	0
2010	30	0.25	1	1	2	36.1	0	1	1	0	pf+	0	1	1	0
2010	39	0.583333	1	1	2	37	0	1	1	0	pf+	0	1	1	0
2010	15	0.916667	1	1	2	36.3	0	1	1	0	pf+	0	1	1	0
2011	13	0.916667	1	1	2	37.2	0	1	1	0	pf+	0	1	1	0
2009	22	1.41667	2	2	1	35	0	1	1	0	pf+	0	1	1	0
2010	11	1.66667	2	2	1	36	0	1	1	0	pf+	0	1	1	0
2010	16	1.66667	2	2	1	36.7	0	1	1	0	tr(+)	0	1	1	0
2009	19	1.75	2	2	2	35.4	0	1	1	0	pf+	0	1	1	0
2009	24	1.75	2	2	1	36.8	0	1	1	0	pf+	0	1	1	0
2010	19	1.75	2	2	1	37.2	0	1	1	0	pf+	0	1	1	0
2010	27	2	2	2	2	36	0	1	1	0	pf+	0	1	1	0
2011	12	2	2	2	1	37	0	1	1	0	pf+	0	1	1	0
2011	12	2	2	2	2	37.1	0	1	1	0	pf+	0	1	1	0
2010	16	2.66667	2	2	2	36.4	0	1	1	0	tr(+)	0	1	1	0
2009	23	3	2	2	2	37.3	0	1	1	0	pf+	0	1	1	0
2010	13	3	2	2	1	36	0	1	1	0	pf+	0	1	1	0
2010	17	3	2	2	2	36.6	0	1	1	0	tr(+)	0	1	1	0
2010	32	3	2	2	2	37.3	0	1	1	0	pf+	0	1	1	0
2010	12	3	2	2	2	36	0	1	1	0	pf+	0	1	1	0
2010	13	3	2	2	1	37.1	0	1	1	0	pf+	0	1	1	0
2009	13	3.75	2	2	2	37.4	0	1	1	0	pf+	0	1	1	0
2010	13	4	2	2	2	36.9	0	1	1	0	pf+	0	1	1	0
2010	27	4	2	2	1	37	0	1	1	0	pf+	0	1	1	0
2010	29	4	2	2	1	36.1	0	1	1	0	pf+	0	1	1	0
2010	30	4	2	2	1	37.3	0	1	1	0	pf+	0	1	1	0
2011	13	4	2	2	2	37	0	1	1	0	pf+	0	1	1	0
2010	17	4.66667	2	2	1	36.6	0	1	1	0	tr(+)	0	1	1	0
2010	13	5	3	3	1	36	0	1	1	0	pf+	0	1	1	0
2010	13	5	3	3	2	37.5	0	1	1	0	pf+	0	1	1	0
2010	19	5	3	3	1	37.1	0	1	1	0	pf+	0	1	1	0
2010	21	5	3	3	1	36	0	1	1	0	pf+	0	1	1	0
2010	26	5	3	3	2	36	0	1	1	0	pf+	0	1	1	0
2010	29	5	3	3	1	37.2	0	1	1	0	pf+	0	1	1	0
2010	16	5.58333	3	3	1	36.6	0	1	1	0	pf+	0	1	1	0
2010	13	6	3	3	1	37.1	0	1	1	0	pf+	0	1	1	0
2010	12	6	3	3	1	37.2	0	1	1	0	pf+	0	1	1	0
2010	27	6	3	3	2	37.3	0	1	1	0	pf+	0	1	1	0
2011	12	6	3	3	2	36	0	1	1	0	pf+	0	1	1	0
2011	13	6	3	3	1	36.5	0	1	1	0	pf+	0	1	1	0
2009	23	7	3	3	1	35.2	0	1	1	0	pf+	0	1	1	0
2010	13	7	3	3	1	37	0	1	1	0	pf+	0	1	1	0
2010	17	7	3	3	2	36.6	0	1	1	0	tr(+)	0	1	1	0
2010	27	7	3	3	1	36	0	1	1	0	pf+	0	1	1	0
2010	28	7	3	3	2	36.2	0	1	1	0	pf+	0	1	1	0
2010	22	8	3	3	1	37.5	0	1	1	0	pf+	0	1	1	0
2010	32	8	3	3	2	36.7	0	1	1	0	pf+	0	1	1	0
2010	22	8	3	3	1	37.5	0	1	1	0	pf+	0	1	1	0
2010	36	9	3	3	1	36	0	1	1	0	pf+	0	1	1	0
2010	30	9	3	3	2	36	0	1	1	0	pf+	0	1	1	0
2010	16	10	4	4	1	36	0	1	1	0	pf+	0	1	1	0
2010	37	10	4	4	2	36.2	0	1	1	0	pf+	0	1	1	0
2010	42	10	4	4	1	36	0	1	1	0	pf+	0	1	1	0
2009	23	11	4	4	2	36.1	0	1	1	0	pf+	0	1	1	0
2010	13	11	4	4	1	36.9	0	1	1	0	pf+	0	1	1	0
2010	36	11	4	4	2	36.1	0	1	1	0	pf+	0	1	1	0
2011	12	11	4	4	2	36	0	1	1	0	pf+	0	1	1	0
2009	23	12	4	4	2	36.3	0	1	1	0	pf+	0	1	1	0
2009	24	12	4	4	2	36.5	0	1	1	0	pf+	0	1	1	0
2010	8	13	4	4	1	36.9	0	1	1	0	1 pf(-)	0	1	1	0
2010	13	13	4	4	2	36.6	0	1	1	0	pf+	0	1	1	0
2010	15	15	5	5	1	36	0	1	1	0	pf+	0	1	1	0
2010	16	15	5	5	1	37.3	0	1	1	0	tr(+)	0	1	1	0
2010	22	15	5	5	1	37.1	0	1	1	0	pf+	0	1	1	0
2009	23	16	5	5	1	36.8	0	1	1	0	pf+	0	1	1	0
2010	10	16	5	5	2	36.7	0	1	1	0	pf+	0	1	1	0
2010	27	17	5	5	2	36	0	1	1	0	pf+	0	1	1	0
2011	2	17	5	5	2	36.6	0	1	1	0	PF1	0	1	1	0
2010	18	18	5	5	1	37.5	0	1	1	0	pf+	0	1	1	0
2010	30	18	5	5	1	37	0	1	1	0	pf+	0	1	1	0
2011	12	18	5	5	1	37	0	1	1	0	pf+	0	1	1	0
2011	14	18	5	5	2	36.3	0	1	1	0	pf+	0	1	1	0
2010	9	19	5	5	2	36.2	0	1	1	0	pf+	0	1	1	0
2010	10	19	5	5	1	36.3	0	1	1	0	pf+	0	1	1	0
2010	18	19	5	5	2	36	0	1	1	0	pf+	0	1	1	0
2010	23	19	5	5	1	37.1	0	1	1	0	pf+	0	1	1	0
2010	37	19	5	5	1	36.2	0	1	1	0	pf+	0	1	1	0
2010	28	19	5	5	2	36.2	0	1	1	0	pf+	0	1	1	0
2009	13	20	5	6	2	36.4	0	1	1	0	trpf(+)	0	1	1	0
2010	13	20	5	6	1	36.1	0	1	1	0	pf+	0	1	1	0
2010	41	20	5	6	2	36	0	1	1	0	pf+	0	1	1	0
2009	21	21	5	6	2	36.5	0	1	1	0	pf+	0	1	1	0
2010	21	21	5	6	2	36.9	0	1	1	0	pf+	0	1	1	0
2011	15	21	5	6	2	36.3	0	1	1	0	pf+	0	1	1	0
2010	15	22	5	6	2	37	0	1	1	0	pf+	0	1	1	0
2010	18	22	5	6	2	36.9	0	1	1	0	pf+	0	1	1	0
2010	23	22	5	6	2	36.2	0	1	1	0	pf+	0	1	1	0
2011	12	22	5	6	1	36	0	1	1	0	pf+	0	1	1	0
2011	12	22	5	6	1	36	0	1	1	0	pf+	0	1	1	0
2009	23	23	5	6	2	35.9	0	1	1	0	pf+	0	1	1	0
2010	11	23	5	6	1	36.1	0	1	1	0	pf+	0	1	1	0
2011	12	23	5	6	2	36.8	0	1	1	0	pf+	0	1	1	0
2011	15	23	5	6	1	36.3	0	1	1	0	pf+	0	1	1	0
2010	18	24	5	6	2	36.1	0	1	1	0	pf+	0	1	1	0
2010	19	24	5	6	1	36.6	0	1	1	0	pf+	0	1	1	0
2009	24	25	5	6	1	36.1	0	1	1	0	pf+	0	1	1	0
2010	15	25	5	6	1	36.4	0	1	1	0	pf+	0	1	1	0
2010	22	25	5	6	1	36.2	0	1	1	0	pf+	0	1	1	0
2010	22	25	5	6	1	36.2	0	1	1	0	pf+	0	1	1	0
2011	11	25	5	6	1	36	0	1	1	0	PF1	0	1	1	0
2010	17	26	5	6	2	36.8	0	1	1	0	pf+	0	1	1	0
2010	17	26	5	6	1	36	0	1	1	0	pf+	0	1	1	0
2010	19	26	5	6	2	37	0	1	1	0	pf+	0	1	1	0
2010	11	26	5	6	2	36.3	0	1	1	0	pf+	0	1	1	0
2010	11	27	5	6	1	36	0	1	1	0	pf+	0	1	1	0
2011	12	27	5	6	1	37	0	1	1	0	pf+	0	1	1	0
2011	12	27	5	6	1	36	0	1	1	0	pf+	0	1	1	0
2009	24	28	5	6	2	35.3	0	1	1	0	pf+	0	1	1	0
2010	23	28	5	6	2	36.7	0	1	1	0	pf++	0	1	1	0
2010	41	28	5	6	2	36.1	0	1	1	0	pf+	0	1	1	0
2011	14	28	5	6	2	36	0	1	1	0	pf+	0	1	1	0
2010	11	29	5	6	1	36.7	0	1	1	0	pf+	0	1	1	0
2010	26	29	5	6	1	36	0	1	1	0	pf+	0	1	1	0
2010	11	30	5	7	1	37.3	0	1	1	0	pf+	0	1	1	0
2010	13	30	5	7	1	36.2	0	1	1	0	pf+	0	1	1	0
2010	32	30	5	7	2	36.3	0	1	1	0	pf+	0	1	1	0
2010	21	30	5	7	2	36.2	0	1	1	0	pf+	0	1	1	0
2011	12	30	5	7	2	36.6	0	1	1	0	pf+	0	1	1	0
2011	13	31	5	7	2	36	0	1	1	0	pf+	0	1	1	0
2011	12	32	5	7	1	37	0	1	1	0	pf+	0	1	1	0
2010	20	33	5	7	2	36.1	0	1	1	0	pf+	0	1	1	0
2010	27	33	5	7	2	36.1	0	1	1	0	pf+	0	1	1	0
2010	35	34	5	7	1	36	0	1	1	0	pf+	0	1	1	0
2010	42	34	5	7	1	36	0	1	1	0	pf+	0	1	1	0
2009	24	35	5	7	1	35.7	0	1	1	0	pf+	0	1	1	0
2010	22	37	5	7	2	36.4	0	1	1	0	pf+	0	1	1	0
2010	12	37	5	7	2	36.6	0	1	1	0	pf+	0	1	1	0
2009	24	38	5	7	1	35.8	0	1	1	0	pf+	0	1	1	0
2009	26	38	5	7	2	35.3	0	1	1	0	pf+	0	1	1	0
2011	15	38	5	7	2	36.8	0	1	1	0	pf+	0	1	1	0
2010	27	40	6	7	1	37	0	1	1	0	pf+	0	1	1	0
2010	19	41	6	7	2	36.1	0	1	1	0	pf+	0	1	1	0
2010	15	42	6	7	2	36.7	0	1	1	0	pf+	0	1	1	0
2011	12	42	6	7	2	37	0	1	1	0	pf+	0	1	1	0
2010	18	43	6	7	1	37	0	1	1	0	pf+	0	1	1	0
2010	36	43	6	7	2	36	0	1	1	0	pf+	0	1	1	0
2011	11	43	6	7	2	36	0	1	1	0	PF1	0	1	1	0
2010	17	45	6	7	1	37	0	1	1	0	pf+	0	1	1	0
2010	35	45	6	7	1	36.2	0	1	1	0	pf+	0	1	1	0
2010	35	47	6	7	2	36	0	1	1	0	pf+	0	1	1	0
2010	26	48	6	7	2	36	0	1	1	0	pf+	0	1	1	0
2010	15	49	6	7	1	36.4	0	1	1	0	pf+	0	1	1	0
2010	17	50	6	8	2	36.7	0	1	1	0	pf+	0	1	1	0
2010	22	50	6	8	2	36.3	0	1	1	0	pf+	0	1	1	0
2009	41	52	6	8	2	36.2	0	1	1	0	pf++++	0	1	1	0
2010	19	52	6	8	1	36	0	1	1	0	pf+	0	1	1	0
2010	37	52	6	8	1	36	0	1	1	0	pf+	0	1	1	0
2010	39	52	6	8	1	36	0	1	1	0	pf+	0	1	1	0
2010	13	53	6	8	1	36.3	0	1	1	0	pf+	0	1	1	0
2010	32	53	6	8	2	36	0	1	1	0	pf+	0	1	1	0
2010	21	53	6	8	2	36.5	0	1	1	0	pf+	0	1	1	0
2011	11	55	6	8	2	36.3	0	1	1	0	PF1	0	1	1	0
2010	18	57	6	8	2	36.1	0	1	1	0	pf+	0	1	1	0
2010	23	58	6	8	2	36.3	0	1	1	0	pf+	0	1	1	0
2011	11	58	6	8	1	36.3	0	1	1	0	PF1	0	1	1	0
2009	40	59	6	8	1	37.2	0	1	1	0	pf	0	1	1	0
2010	40	60	6	8	2	37.1	0	1	1	0	pf+	0	1	1	0
2009	21	62	6	8	1	36.7	0	1	1	0	pf+	0	1	1	0
2011	12	66	6	8	2	36	0	1	1	0	pf+	0	1	1	0
2010	33	67	6	8	1	37.5	0	1	1	0	pf+	0	1	1	0
2010	39	67	6	8	2	37.1	0	1	1	0	pf+	0	1	1	0
2010	22	68	6	8	2	36.7	0	1	1	0	pf+	0	1	1	0
2010	22	68	6	8	2	36.7	0	1	1	0	pf+	0	1	1	0
2010	27	68	6	8	2	36	0	1	1	0	pf+	0	1	1	0
2010	29	68	6	8	2	36	0	1	1	0	pf+	0	1	1	0
2010	29	69	6	8	1	37.2	0	1	1	0	pf+	0	1	1	0
2010	26	72	6	8	2	36	0	1	1	0	pf+	0	1	1	0
2010	11	79	6	8	1	36	0	1	1	0	pf+	0	1	1	0
2010	19	82	6	8	1	36.6	0	1	1	0	pf+	0	1	1	0
2011	1	0.583333	1	1	2		0	0	0	1	PF1	0	1	1	0
2010	45	1.66667	2	2	1		0	0	0	1	pf+	0	1	1	0
2010	43	3	2	2	1		0	0	0	1	pf+	0	1	1	0
2010	28	5	3	3	1		0	0	0	1	pf+	0	1	1	0
2010	52	7	3	3	1		0	0	0	1	PF1	0	1	1	0
2011	15	9	3	3	2		0	0	0	1	pf+	0	1	1	0
2010	44	10	4	4	2		0	0	0	1	pf+	0	1	1	0
2011	15	11	4	4	1		0	0	0	1	pf+	0	1	1	0
2011	17	12	4	4	2		0	0	0	1	pf+	0	1	1	0
2011	12	14	4	4	1		0	0	0	1	pf+	0	1	1	0
2011	17	14	4	4	1		0	0	0	1	pf+	0	1	1	0
2011	16	17	5	5	2		0	0	0	1	pf+	0	1	1	0
2009	23	19	5	5	2	34.6	0	0	0	1	pf+	0	1	1	0
2010	52	24	5	6	2		0	0	0	1	PF1	0	1	1	0
2011	16	24	5	6	2		0	0	0	1	pf+	0	1	1	0
2010	46	25	5	6	1		0	0	0	1	pf+	0	1	1	0
2010	46	25	5	6	1		0	0	0	1	pf+	0	1	1	0
2010	51	28	5	6	2		0	0	0	1	PF1	0	1	1	0
2010	44	32	5	7	2		0	0	0	1	pf+	0	1	1	0
2010	46	35	5	7	1		0	0	0	1	pf+	0	1	1	0
2011	17	38	5	7	2		0	0	0	1	pf+	0	1	1	0
2010	47	42	6	7	1		0	0	0	1	pf+	0	1	1	0
2010	50	45	6	7	2		0	0	0	1	pf1	0	1	1	0
2011	15	51	6	8	2		0	0	0	1	pf+	0	1	1	0
2009	25	52	6	8	2	34.8	0	0	0	1	pf+	0	1	1	0
2010	44	55	6	8	2		0	0	0	1	pf+	0	1	1	0
2011	16	60	6	8	1		0	0	0	1	pf+	0	1	1	0
2011	14	68	6	8	2		0	0	0	1	pf+	0	1	1	0
2011	12	1.9	2	2	1	37	0	1	0	1	pf+	0	1	1	0
2009	25	2	2	2	2	36.6	0	1	0	1	pf+	0	1	1	0
2010	13	3	2	2	1	36.1	0	1	0	1	pf+	0	1	1	0
2010	11	4	2	2	2	36.5	0	1	0	1	pf+	0	1	1	0
2010	13	6	3	3	1	37.4	0	1	0	1	pf+	0	1	1	0
2011	13	6	3	3	1	36	0	1	0	1	pf+	0	1	1	0
2010	13	7	3	3	1	36.5	0	1	0	1	pf+	0	1	1	0
2010	18	7	3	3	1	36.5	0	1	0	1	pf+	0	1	1	0
2010	36	7	3	3	1	36	0	1	0	1	pf+	0	1	1	0
2010	26	7	3	3	2	36.9	0	1	0	1	pf+	0	1	1	0
2010	27	8	3	3	1	37.5	0	1	0	1	pf+	0	1	1	0
2010	23	9	3	3	2	36.9	0	1	0	1	pf+	0	1	1	0
2010	10	10	4	4	2	36	0	1	0	1	pf+	0	1	1	0
2010	21	10	4	4	2	36.3	0	1	0	1	pf+	0	1	1	0
2010	26	10	4	4	2	36	0	1	0	1	pf+	0	1	1	0
2010	10	11	4	4	1	36.3	0	1	0	1	pf+	0	1	1	0
2010	15	11	4	4	1	36.1	0	1	0	1	pf+	0	1	1	0
2010	23	11	4	4	1	36.1	0	1	0	1	pf+	0	1	1	0
2011	11	11	4	4	2	36.2	0	1	0	1	PF1	0	1	1	0
2011	12	11	4	4	2	36.3	0	1	0	1	pf+	0	1	1	0
2009	25	12	4	4	1	35.8	0	1	0	1	pf+	0	1	1	0
2010	22	12	4	4	2	37	0	1	0	1	pf+	0	1	1	0
2010	22	12	4	4	2	37	0	1	0	1	pf+	0	1	1	0
2010	32	15	5	5	1	36.5	0	1	0	1	pf+	0	1	1	0
2010	8	16	5	5	1	36	0	1	0	1	2 pf(-)	0	1	1	0
2010	12	16	5	5	1	36.1	0	1	0	1	pf+	0	1	1	0
2011	13	18	5	5	2	37	0	1	0	1	pf+	0	1	1	0
2010	13	20	5	6	2	36	0	1	0	1	pf+	0	1	1	0
2010	36	24	5	6	2	36	0	1	0	1	pf+	0	1	1	0
2010	37	24	5	6	2	36.5	0	1	0	1	pf+	0	1	1	0
2011	18	25	5	6	2	36	0	1	0	1	pf+	0	1	1	0
2010	1	28	5	6	1	36.2	0	1	0	1	PF1	0	1	1	0
2010	37	29	5	6	2	36	0	1	0	1	pf+	0	1	1	0
2009	27	30	5	7	2	35.9	0	1	0	1	pf+	0	1	1	0
2009	25	31	5	7	2	35.4	0	1	0	1	pf+	0	1	1	0
2010	16	40	6	7	2	36.3	0	1	0	1	pf+	0	1	1	0
2010	30	41	6	7	2	37.1	0	1	0	1	pf+	0	1	1	0
2010	26	44	6	7	1	36.4	0	1	0	1	pf+	0	1	1	0
2010	37	47	6	7	2	37	0	1	0	1	pf+	0	1	1	0
2010	16	50	6	8	2	36.1	0	1	0	1	tr(+)	0	1	1	0
2010	40	56	6	8	1	37.2	0	1	0	1	pf+	0	1	1	0
2010	26	66	6	8	2	36.1	0	1	0	1	pf+	0	1	1	0
2010	23	68	6	8	2	36.7	0	1	0	1	pf+	0	1	1	0
2011	11	69	6	8	1	36.3	0	1	0	1	PF1	0	1	1	0
2010	16	0.416667	1	1	1		0	0	1	0		0	1	0	0
2011	4	0.416667	1	1	2		0	0	1	0	2	0	1	0	0
2009	36	1	2	2	1	34.9	0	0	1	0		0	1	0	0
2011	13	2.6	2	2	2		0	0	1	0		0	1	0	0
2009	30	4	2	2	1	34.5	0	0	1	0		0	1	0	0
2011	15	4	2	2	1		0	0	1	0		0	1	0	0
2009	24	7	3	3	2	34.2	0	0	1	0		0	1	0	0
2009	27	11	4	4	1	34	0	0	1	0		0	1	0	0
2010	16	11	4	4	1		0	0	1	0		0	1	0	0
2009	34	12	4	4	1	33	0	0	1	0		0	1	0	0
2011	14	13	4	4	1		0	0	1	0		0	1	0	0
2009	35	14	4	4	1	34.7	0	0	1	0		0	1	0	0
2010	2	18	5	5	1		0	0	1	0		0	1	0	0
2011	20	18	5	5	1		0	0	1	0		0	1	0	0
2009	25	19	5	5	2	34.2	0	0	1	0		0	1	0	0
2009	29	19	5	5	1	32.5	0	0	1	0		0	1	0	0
2011	3	20	5	6	2		0	0	1	0	24	0	1	0	0
2011	5	20	5	6	2		0	0	1	0	9	0	1	0	0
2009	30	21	5	6	2	34.1	0	0	1	0		0	1	0	0
2010	34	22	5	6	2		0	0	1	0	18	0	1	0	0
2009	31	24	5	6	1	34.8	0	0	1	0		0	1	0	0
2009	29	25	5	6	1	34.7	0	0	1	0		0	1	0	0
2011	4	25	5	6	2		0	0	1	0	1	0	1	0	0
2010	34	26	5	6	2		0	0	1	0	22	0	1	0	0
2009	27	29	5	6	2	34.3	0	0	1	0		0	1	0	0
2011	9	29	5	6	2		0	0	1	0	3	0	1	0	0
2011	3	35	5	7	2		0	0	1	0	16	0	1	0	0
2011	21	36	5	7	2		0	0	1	0		0	1	0	0
2009	30	38	5	7	2	33.3	0	0	1	0		0	1	0	0
2011	8	39	5	7	1		0	0	1	0	30	0	1	0	0
2009	29	44	6	7	1	34.1	0	0	1	0		0	1	0	0
2011	8	55	6	8	1		0	0	1	0	20	0	1	0	0
2011	4	57	6	8	2		0	0	1	0	3	0	1	0	0
2011	8	58	6	8	2		0	0	1	0	23	0	1	0	0
2011	19	66	6	8	2		0	0	1	0		0	1	0	0
2011	9	68	6	8	2		0	0	1	0	2	0	1	0	0
2011	3	69	6	8	2		0	0	1	0	13	0	1	0	0
2010	5	0.333333	1	1	1	36.3	0	1	1	0		0	1	0	0
2010	6	0.333333	1	1	2	37.2	0	1	1	0		0	1	0	0
2010	1	0.416667	1	1	1	37.3	0	1	1	0		0	1	0	0
2010	11	0.416667	1	1	2	36.5	0	1	1	0		0	1	0	0
2009	25	0.5	1	1	2	37	0	1	1	0		0	1	0	0
2010	5	0.5	1	1	1	37	0	1	1	0		0	1	0	0
2009	31	0.666667	1	1	1	37.3	0	1	1	0		0	1	0	0
2010	16	0.75	1	1	1	36.7	0	1	1	0		0	1	0	0
2011	5	0.75	1	1	1	36.9	0	1	1	0	7	0	1	0	0
2009	37	0.916667	1	1	1	37.1	0	1	1	0		0	1	0	0
2010	5	1	2	2	1	36.8	0	1	1	0		0	1	0	0
2009	29	1.33333	2	2	2	35.3	0	1	1	0		0	1	0	0
2010	2	1.66667	2	2	2	36.1	0	1	1	0		0	1	0	0
2010	7	1.66667	2	2	2	37.3	0	1	1	0		0	1	0	0
2009	23	1.75	2	2	2	37.2	0	1	1	0		0	1	0	0
2009	27	1.75	2	2	2	37.5	0	1	1	0		0	1	0	0
2009	26	2	2	2	2	36	0	1	1	0		0	1	0	0
2010	2	2	2	2	1	36.7	0	1	1	0		0	1	0	0
2010	4	2	2	2	1	36.8	0	1	1	0		0	1	0	0
2009	29	2.41667	2	2	2	37.5	0	1	1	0		0	1	0	0
2009	25	3	2	2	2	35.5	0	1	1	0		0	1	0	0
2009	25	3	2	2	1	37	0	1	1	0		0	1	0	0
2009	25	3	2	2	2	36.7	0	1	1	0		0	1	0	0
2009	39	3	2	2	1	36.1	0	1	1	0		0	1	0	0
2009	40	3	2	2	1	36.7	0	1	1	0		0	1	0	0
2009	23	4	2	2	2	36.6	0	1	1	0		0	1	0	0
2009	25	4	2	2	2	37.2	0	1	1	0		0	1	0	0
2009	52	4	2	2	1	37.3	0	1	1	0	8	0	1	0	0
2009	52	4	2	2	2	36.7	0	1	1	0	13	0	1	0	0
2010	34	4	2	2	2	36.4	0	1	1	0	24	0	1	0	0
2009	35	5	3	3	1	35.1	0	1	1	0		0	1	0	0
2009	42	5	3	3	1	36.9	0	1	1	0		0	1	0	0
2010	1	5	3	3	1	36.8	0	1	1	0		0	1	0	0
2010	7	5	3	3	2	36.8	0	1	1	0		0	1	0	0
2011	10	5	3	3	2	36.5	0	1	1	0	15	0	1	0	0
2011	15	5	3	3	1	37	0	1	1	0		0	1	0	0
2009	22	6	3	3	2	36.6	0	1	1	0		0	1	0	0
2009	25	6	3	3	2	36.1	0	1	1	0		0	1	0	0
2009	36	6	3	3	1	36.2	0	1	1	0		0	1	0	0
2009	42	6	3	3	1	37.4	0	1	1	0		0	1	0	0
2010	25	6	3	3	2	36	0	1	1	0	67	0	1	0	0
2010	34	6	3	3	2	36.7	0	1	1	0	20	0	1	0	0
2009	24	7	3	3	2	37.4	0	1	1	0		0	1	0	0
2009	31	7	3	3	2	37	0	1	1	0		0	1	0	0
2009	38	7	3	3	2	37.2	0	1	1	0		0	1	0	0
2009	41	8	3	3	2	36.2	0	1	1	0		0	1	0	0
2009	42	8	3	3	1	37.4	0	1	1	0		0	1	0	0
2010	20	8	3	3	2	36.5	0	1	1	0	13	0	1	0	0
2010	8	9	3	3	1	36.5	0	1	1	0		0	1	0	0
2011	6	9	3	3	2	36	0	1	1	0	12	0	1	0	0
2011	10	9	3	3	1	36.3	0	1	1	0	19	0	1	0	0
2010	9	10	4	4	1	37.4	0	1	1	0		0	1	0	0
2009	23	12	4	4	1	35.1	0	1	1	0		0	1	0	0
2009	24	12	4	4	2	35.2	0	1	1	0		0	1	0	0
2009	30	12	4	4	1	36.1	0	1	1	0		0	1	0	0
2009	36	12	4	4	2	36.6	0	1	1	0		0	1	0	0
2009	36	12	4	4	2	35.8	0	1	1	0		0	1	0	0
2009	39	12	4	4	2	36.1	0	1	1	0		0	1	0	0
2010	5	12	4	4	2	36.3	0	1	1	0		0	1	0	0
2010	7	12	4	4	2	36.3	0	1	1	0		0	1	0	0
2009	40	13	4	4	1	36.6	0	1	1	0		0	1	0	0
2010	2	13	4	4	1	36.1	0	1	1	0		0	1	0	0
2010	8	14	4	4	1	37.4	0	1	1	0		0	1	0	0
2011	9	14	4	4	1	36.3	0	1	1	0	6	0	1	0	0
2011	13	14	4	4	2	36	0	1	1	0		0	1	0	0
2009	38	15	5	5	2	37.1	0	1	1	0		0	1	0	0
2010	4	15	5	5	1	36.8	0	1	1	0		0	1	0	0
2009	26	16	5	5	2	36.3	0	1	1	0		0	1	0	0
2009	27	16	5	5	2	35	0	1	1	0		0	1	0	0
2010	1	16	5	5	2	36.5	0	1	1	0		0	1	0	0
2009	26	17	5	5	2	35	0	1	1	0		0	1	0	0
2009	31	17	5	5	1	36.6	0	1	1	0		0	1	0	0
2011	20	17	5	5	2	36.7	0	1	1	0		0	1	0	0
2009	26	18	5	5	1	35	0	1	1	0		0	1	0	0
2009	37	18	5	5	1	37.1	0	1	1	0		0	1	0	0
2010	24	18	5	5	2	36	0	1	1	0	64	0	1	0	0
2010	24	18	5	5	2	36	0	1	1	0	63	0	1	0	0
2011	19	18	5	5	2	36.8	0	1	1	0		0	1	0	0
2009	42	19	5	5	1	36.1	0	1	1	0		0	1	0	0
2010	3	19	5	5	2	36.7	0	1	1	0		0	1	0	0
2010	7	19	5	5	2	37	0	1	1	0		0	1	0	0
2009	33	20	5	6	1	35	0	1	1	0		0	1	0	0
2009	39	20	5	6	2	36.4	0	1	1	0		0	1	0	0
2009	42	20	5	6	1	37.4	0	1	1	0		0	1	0	0
2010	1	20	5	6	2	37.4	0	1	1	0		0	1	0	0
2010	6	20	5	6	2	36.1	0	1	1	0		0	1	0	0
2010	33	20	5	6	2	37	0	1	1	0	5	0	1	0	0
2009	25	21	5	6	2	35.7	0	1	1	0		0	1	0	0
2009	27	21	5	6	1	35.8	0	1	1	0		0	1	0	0
2009	38	21	5	6	2	36.2	0	1	1	0		0	1	0	0
2010	20	21	5	6	2	37.1	0	1	1	0	5	0	1	0	0
2010	33	21	5	6	2	36.5	0	1	1	0	7	0	1	0	0
2009	36	22	5	6	1	36.1	0	1	1	0		0	1	0	0
2010	3	22	5	6	2	37.2	0	1	1	0		0	1	0	0
2010	23	22	5	6	2	37.1	0	1	1	0	41	0	1	0	0
2009	31	23	5	6	2	36.5	0	1	1	0		0	1	0	0
2009	38	23	5	6	2	36.5	0	1	1	0		0	1	0	0
2009	41	23	5	6	2	37.4	0	1	1	0		0	1	0	0
2009	41	23	5	6	2	37.3	0	1	1	0		0	1	0	0
2009	42	23	5	6	1	37.1	0	1	1	0		0	1	0	0
2010	5	23	5	6	2	36.5	0	1	1	0		0	1	0	0
2010	5	23	5	6	1	36.1	0	1	1	0		0	1	0	0
2011	19	23	5	6	2	36	0	1	1	0		0	1	0	0
2009	26	24	5	6	2	35.5	0	1	1	0		0	1	0	0
2011	7	24	5	6	2	36.2	0	1	1	0	16	0	1	0	0
2009	38	25	5	6	1	36.3	0	1	1	0		0	1	0	0
2009	39	25	5	6	1	35.9	0	1	1	0		0	1	0	0
2010	4	25	5	6	2	37.2	0	1	1	0		0	1	0	0
2010	9	25	5	6	1	37.3	0	1	1	0		0	1	0	0
2010	24	25	5	6	2	36.5	0	1	1	0	61	0	1	0	0
2009	24	26	5	6	2	36.6	0	1	1	0		0	1	0	0
2009	38	26	5	6	2	36.3	0	1	1	0		0	1	0	0
2010	6	26	5	6	2	36.7	0	1	1	0		0	1	0	0
2009	22	27	5	6	2	36.4	0	1	1	0		0	1	0	0
2009	25	27	5	6	1	35.9	0	1	1	0		0	1	0	0
2009	27	27	5	6	2	35.5	0	1	1	0		0	1	0	0
2009	42	27	5	6	2	36.4	0	1	1	0		0	1	0	0
2011	13	27	5	6	2	36.2	0	1	1	0		0	1	0	0
2009	31	28	5	6	2	36.6	0	1	1	0		0	1	0	0
2009	40	28	5	6	1	37.3	0	1	1	0		0	1	0	0
2010	8	28	5	6	2	37	0	1	1	0		0	1	0	0
2010	8	28	5	6	2	36	0	1	1	0		0	1	0	0
2011	10	28	5	6	2	36.5	0	1	1	0	10	0	1	0	0
2009	27	29	5	6	1	37	0	1	1	0		0	1	0	0
2010	33	29	5	6	2	36	0	1	1	0	14	0	1	0	0
2009	39	30	5	7	2	36	0	1	1	0		0	1	0	0
2010	6	30	5	7	2	36.2	0	1	1	0		0	1	0	0
2010	8	30	5	7	2	36.9	0	1	1	0		0	1	0	0
2010	9	30	5	7	2	36.2	0	1	1	0		0	1	0	0
2010	33	30	5	7	2	36.8	0	1	1	0	3	0	1	0	0
2010	33	30	5	7	2	37.2	0	1	1	0	17	0	1	0	0
2011	5	30	5	7	2	36.3	0	1	1	0	6	0	1	0	0
2009	36	31	5	7	2	36.1	0	1	1	0		0	1	0	0
2009	25	32	5	7	2	36	0	1	1	0		0	1	0	0
2009	29	32	5	7	2	36.5	0	1	1	0		0	1	0	0
2010	6	32	5	7	2	36	0	1	1	0		0	1	0	0
2011	4	32	5	7	2	36.4	0	1	1	0	4	0	1	0	0
2011	6	32	5	7	2	36.7	0	1	1	0	13	0	1	0	0
2009	40	33	5	7	2	36	0	1	1	0		0	1	0	0
2009	41	33	5	7	2	36.3	0	1	1	0		0	1	0	0
2010	6	33	5	7	2	36	0	1	1	0		0	1	0	0
2010	20	34	5	7	2	36.7	0	1	1	0	14	0	1	0	0
2010	25	34	5	7	2	36.5	0	1	1	0	s/lamina	0	1	0	0
2011	8	34	5	7	2	36.8	0	1	1	0	26	0	1	0	0
2009	29	35	5	7	1	35.1	0	1	1	0		0	1	0	0
2009	36	35	5	7	2	35.9	0	1	1	0		0	1	0	0
2011	9	35	5	7	2	36.4	0	1	1	0	9	0	1	0	0
2009	25	36	5	7	1	35.1	0	1	1	0		0	1	0	0
2009	33	36	5	7	1	36.2	0	1	1	0		0	1	0	0
2009	39	36	5	7	2	36.1	0	1	1	0		0	1	0	0
2009	36	37	5	7	2	35.3	0	1	1	0		0	1	0	0
2009	37	37	5	7	1	36.3	0	1	1	0		0	1	0	0
2010	2	37	5	7	2	36.6	0	1	1	0		0	1	0	0
2010	33	37	5	7	2	36	0	1	1	0	4	0	1	0	0
2011	10	37	5	7	2	36.5	0	1	1	0	14	0	1	0	0
2009	30	38	5	7	2	36.2	0	1	1	0		0	1	0	0
2009	31	38	5	7	1	37.4	0	1	1	0		0	1	0	0
2009	42	39	5	7	2	36.5	0	1	1	0		0	1	0	0
2009	21	40	6	7	2	35.8	0	1	1	0		0	1	0	0
2009	35	40	6	7	2	36	0	1	1	0		0	1	0	0
2010	2	40	6	7	2	36.5	0	1	1	0		0	1	0	0
2009	32	42	6	7	2	35.9	0	1	1	0		0	1	0	0
2009	33	42	6	7	2	36.2	0	1	1	0		0	1	0	0
2009	38	42	6	7	2	37.2	0	1	1	0		0	1	0	0
2009	36	43	6	7	2	36.2	0	1	1	0		0	1	0	0
2009	38	43	6	7	2	36.2	0	1	1	0		0	1	0	0
2011	13	43	6	7	2	36.9	0	1	1	0		0	1	0	0
2009	32	44	6	7	2	37.1	0	1	1	0		0	1	0	0
2010	5	44	6	7	2	36.1	0	1	1	0		0	1	0	0
2010	33	44	6	7	2	36.2	0	1	1	0	12	0	1	0	0
2009	21	45	6	7	1	37.3	0	1	1	0		0	1	0	0
2009	22	45	6	7	2	35.1	0	1	1	0		0	1	0	0
2009	26	45	6	7	2	37.3	0	1	1	0		0	1	0	0
2009	39	45	6	7	2	36.9	0	1	1	0		0	1	0	0
2009	42	45	6	7	2	36.8	0	1	1	0		0	1	0	0
2010	3	45	6	7	1	37.4	0	1	1	0		0	1	0	0
2010	7	45	6	7	2	36	0	1	1	0		0	1	0	0
2010	8	45	6	7	2	36.4	0	1	1	0		0	1	0	0
2009	37	46	6	7	2	36	0	1	1	0		0	1	0	0
2010	8	46	6	7	2	36.3	0	1	1	0		0	1	0	0
2011	9	46	6	7	1	36.7	0	1	1	0	4	0	1	0	0
2010	7	47	6	7	2	36.6	0	1	1	0		0	1	0	0
2010	33	47	6	7	2	36.1	0	1	1	0	10	0	1	0	0
2010	5	48	6	7	2	36.5	0	1	1	0		0	1	0	0
2011	8	48	6	7	2	36.8	0	1	1	0	25	0	1	0	0
2011	9	48	6	7	1	37	0	1	1	0	5	0	1	0	0
2009	30	49	6	7	2	37.4	0	1	1	0		0	1	0	0
2009	38	49	6	7	1	36.6	0	1	1	0		0	1	0	0
2010	1	50	6	8	2	36.6	0	1	1	0		0	1	0	0
2010	2	50	6	8	1	36.6	0	1	1	0		0	1	0	0
2010	7	50	6	8	2	36.1	0	1	1	0		0	1	0	0
2010	24	51	6	8	2	36.4	0	1	1	0	59	0	1	0	0
2009	22	52	6	8	1	36.7	0	1	1	0		0	1	0	0
2009	29	52	6	8	1	35.3	0	1	1	0		0	1	0	0
2009	31	52	6	8	2	37.2	0	1	1	0		0	1	0	0
2009	34	52	6	8	2	35.8	0	1	1	0		0	1	0	0
2010	2	52	6	8	2	36	0	1	1	0		0	1	0	0
2010	20	52	6	8	2	37.2	0	1	1	0	15	0	1	0	0
2010	23	52	6	8	2	37	0	1	1	0	39	0	1	0	0
2011	8	52	6	8	2	36.3	0	1	1	0	21	0	1	0	0
2009	33	53	6	8	2	37.3	0	1	1	0		0	1	0	0
2010	2	54	6	8	2	36.5	0	1	1	0		0	1	0	0
2010	5	54	6	8	1	36	0	1	1	0		0	1	0	0
2009	27	55	6	8	1	35.5	0	1	1	0		0	1	0	0
2010	4	55	6	8	2	36.3	0	1	1	0		0	1	0	0
2011	21	55	6	8	2	36	0	1	1	0		0	1	0	0
2009	38	56	6	8	2	36.8	0	1	1	0		0	1	0	0
2009	40	58	6	8	1	36	0	1	1	0		0	1	0	0
2010	1	58	6	8	2	36.3	0	1	1	0		0	1	0	0
2010	33	58	6	8	2	36	0	1	1	0	6	0	1	0	0
2010	33	58	6	8	2	36.5	0	1	1	0	9	0	1	0	0
2009	37	60	6	8	2	36.2	0	1	1	0		0	1	0	0
2010	1	60	6	8	1	36.9	0	1	1	0		0	1	0	0
2009	38	63	6	8	2	36.7	0	1	1	0		0	1	0	0
2010	10	63	6	8	1	36.4	0	1	1	0		0	1	0	0
2009	31	66	6	8	2	35.5	0	1	1	0		0	1	0	0
2009	36	66	6	8	1	36.9	0	1	1	0		0	1	0	0
2009	39	66	6	8	2	36	0	1	1	0		0	1	0	0
2009	52	66	6	8	2	37.4	0	1	1	0	14	0	1	0	0
2010	23	67	6	8	2	36.5	0	1	1	0	38	0	1	0	0
2010	24	67	6	8	2	36	0	1	1	0	60	0	1	0	0
2010	6	68	6	8	2	36.9	0	1	1	0		0	1	0	0
2010	33	68	6	8	2	36.1	0	1	1	0	13	0	1	0	0
2009	30	71	6	8	1	35.8	0	1	1	0		0	1	0	0
2011	10	72	6	8	2	36	0	1	1	0	13	0	1	0	0
2009	39	78	6	8	1	36	0	1	1	0		0	1	0	0
2010	5	78	6	8	2	36.5	0	1	1	0		0	1	0	0
2011	8	78	6	8	1	36.1	0	1	1	0	19	0	1	0	0
2011	3	79	6	8	1	36.4	0	1	1	0	14	0	1	0	0
2011	16	7	3	3	2		0	0	0	1		0	1	0	0
2011	19	8	3	3	1		0	0	0	1		0	1	0	0
2011	10	9	3	3	2		0	0	0	1	12	0	1	0	0
2011	9	12	4	4	2		0	0	0	1	8	0	1	0	0
2011	5	14	4	4	1		0	0	0	1	8	0	1	0	0
2009	29	15	5	5	1	34	0	0	0	1		0	1	0	0
2011	8	16	5	5	2		0	0	0	1	32	0	1	0	0
2009	33	17	5	5	1	34.5	0	0	0	1		0	1	0	0
2011	5	17	5	5	1		0	0	0	1	5	0	1	0	0
2009	29	28	5	6	2	34.8	0	0	0	1		0	1	0	0
2009	27	31	5	7	1	33.7	0	0	0	1		0	1	0	0
2009	31	47	6	7	1	33.9	0	0	0	1		0	1	0	0
2009	22	0.333333	1	1	1	35.7	0	1	0	1		0	1	0	0
2009	25	0.75	1	1	2	36.1	0	1	0	1		0	1	0	0
2010	3	0.833333	1	1	1	36.1	0	1	0	1		0	1	0	0
2009	22	4	2	2	2	35.9	0	1	0	1		0	1	0	0
2011	14	4	2	2	1	37	0	1	0	1		0	1	0	0
2010	24	5	3	3	2	37	0	1	0	1	54	0	1	0	0
2009	25	8	3	3	1	37.5	0	1	0	1		0	1	0	0
2009	37	8	3	3	2	36.8	0	1	0	1		0	1	0	0
2011	8	8	3	3	2	36	0	1	0	1	31	0	1	0	0
2011	19	8	3	3	2	36	0	1	0	1		0	1	0	0
2009	27	9	3	3	1	36.6	0	1	0	1		0	1	0	0
2009	42	9	3	3	2	36.7	0	1	0	1		0	1	0	0
2009	42	10	4	4	2	36.1	0	1	0	1		0	1	0	0
2010	7	11	4	4	1	37.4	0	1	0	1		0	1	0	0
2009	33	12	4	4	1	37.2	0	1	0	1		0	1	0	0
2010	2	13	4	4	1	37	0	1	0	1		0	1	0	0
2009	27	14	4	4	2	37.1	0	1	0	1		0	1	0	0
2009	43	16	5	5	2	36.6	0	1	0	1		0	1	0	0
2009	42	17	5	5	1	37.2	0	1	0	1		0	1	0	0
2009	29	18	5	5	1	37.4	0	1	0	1		0	1	0	0
2011	13	18	5	5	2	37	0	1	0	1		0	1	0	0
2009	25	19	5	5	2	35.3	0	1	0	1		0	1	0	0
2009	52	19	5	5	2	37.1	0	1	0	1	7	0	1	0	0
2009	38	20	5	6	2	37.3	0	1	0	1		0	1	0	0
2009	29	21	5	6	2	36.9	0	1	0	1		0	1	0	0
2009	37	21	5	6	1	36.9	0	1	0	1		0	1	0	0
2009	32	23	5	6	2	36.4	0	1	0	1		0	1	0	0
2009	33	23	5	6	1	36.1	0	1	0	1		0	1	0	0
2009	38	23	5	6	2	36.9	0	1	0	1		0	1	0	0
2010	1	24	5	6	1	37.3	0	1	0	1		0	1	0	0
2009	26	25	5	6	2	36	0	1	0	1		0	1	0	0
2009	38	25	5	6	2	36.5	0	1	0	1		0	1	0	0
2009	42	25	5	6	2	36	0	1	0	1		0	1	0	0
2009	33	27	5	6	2	36.4	0	1	0	1		0	1	0	0
2010	2	27	5	6	2	36.8	0	1	0	1		0	1	0	0
2009	37	28	5	6	2	36.2	0	1	0	1		0	1	0	0
2011	8	28	5	6	2	36.6	0	1	0	1	28	0	1	0	0
2009	22	29	5	6	2	36.8	0	1	0	1		0	1	0	0
2009	24	30	5	7	2	35.5	0	1	0	1		0	1	0	0
2009	32	30	5	7	2	35.7	0	1	0	1		0	1	0	0
2009	39	30	5	7	2	35.4	0	1	0	1		0	1	0	0
2010	1	30	5	7	2	37.1	0	1	0	1		0	1	0	0
2009	40	41	6	7	2	36.5	0	1	0	1		0	1	0	0
2010	4	43	6	7	2	36.8	0	1	0	1		0	1	0	0
2009	30	44	6	7	2	36.4	0	1	0	1		0	1	0	0
2009	39	45	6	7	2	37.4	0	1	0	1		0	1	0	0
2011	7	45	6	7	2	37.1	0	1	0	1	15	0	1	0	0
2010	5	47	6	7	2	36.6	0	1	0	1		0	1	0	0
2010	6	48	6	7	1	36.1	0	1	0	1		0	1	0	0
2010	2	53	6	8	1	37.5	0	1	0	1		0	1	0	0
2009	33	54	6	8	2	35.5	0	1	0	1		0	1	0	0
2010	20	65	6	8	2	36	0	1	0	1	6	0	1	0	0
2009	29	66	6	8	2	35.5	0	1	0	1		0	1	0	0
2009	30	66	6	8	2	36.9	0	1	0	1		0	1	0	0
2010	5	66	6	8	2	36.9	0	1	0	1		0	1	0	0
2009	38	68	6	8	2	36.5	0	1	0	1		0	1	0	0
2010	8	73	6	8	1	36	0	1	0	1		0	1	0	0
2010	16	73	6	8	1	36.7	0	1	0	1		0	1	0	0
2009	13	15	5	5	1	36.9	0	1	0	0	tr(-)	0	1	0	1
2010	22	44	6	7	1	37	0	1	0	0	Nse	0	1	0	1
2010	50	0.583333	1	1	1		0	0	1	0	pf-	0	1	0	1
2010	48	1	2	2	1		0	0	1	0	0	0	1	0	1
2010	49	2	2	2	1		0	0	1	0	0	0	1	0	1
2010	43	5	3	3	2		0	0	1	0	pf-	0	1	0	1
2010	48	5	3	3	1		0	0	1	0	0	0	1	0	1
2010	48	5	3	3	2		0	0	1	0	0	0	1	0	1
2010	42	6	3	3	2		0	0	1	0	pf-	0	1	0	1
2011	2	6	3	3	2		0	0	1	0	0	0	1	0	1
2010	50	7	3	3	2		0	0	1	0	pf-	0	1	0	1
2010	29	9	3	3	1		0	0	1	0	pf-	0	1	0	1
2009	25	10	4	4	2	34.6	0	0	1	0	pf-	0	1	0	1
2010	43	10	4	4	1		0	0	1	0	pf-	0	1	0	1
2010	46	10	4	4	1		0	0	1	0	pf-	0	1	0	1
2010	28	10	4	4	2		0	0	1	0	pf-	0	1	0	1
2010	49	11	4	4	1		0	0	1	0	0	0	1	0	1
2010	44	13	4	4	2		0	0	1	0	pf-	0	1	0	1
2010	49	14	4	4	2		0	0	1	0	0	0	1	0	1
2010	49	17	5	5	1		0	0	1	0	0	0	1	0	1
2010	50	17	5	5	2		0	0	1	0	pf-	0	1	0	1
2010	16	18	5	5	1		0	0	1	0	tr(-)	0	1	0	1
2010	44	19	5	5	2		0	0	1	0	pf-	0	1	0	1
2010	40	20	5	6	1		0	0	1	0	pf-	0	1	0	1
2010	42	20	5	6	1		0	0	1	0	pf-	0	1	0	1
2010	45	20	5	6	2		0	0	1	0	pf-	0	1	0	1
2010	30	22	5	6	2		0	0	1	0	pf-	0	1	0	1
2011	1	22	5	6	2		0	0	1	0	pf-	0	1	0	1
2010	39	25	5	6	2		0	0	1	0	pf-	0	1	0	1
2010	44	25	5	6	1		0	0	1	0	pf-	0	1	0	1
2010	44	25	5	6	1		0	0	1	0	pf-	0	1	0	1
2010	17	26	5	6	2		0	0	1	0	tr(-)	0	1	0	1
2010	45	26	5	6	2		0	0	1	0	pf-	0	1	0	1
2010	50	26	5	6	1		0	0	1	0	pf-	0	1	0	1
2011	18	26	5	6	1		0	0	1	0	pf-	0	1	0	1
2009	22	28	5	6	2	34.7	0	0	1	0	pf-	0	1	0	1
2010	44	30	5	7	2		0	0	1	0	pf-	0	1	0	1
2010	49	30	5	7	2		0	0	1	0	0	0	1	0	1
2010	28	30	5	7	2		0	0	1	0	pf-	0	1	0	1
2010	49	33	5	7	2		0	0	1	0	0	0	1	0	1
2010	42	34	5	7	2		0	0	1	0	pf-	0	1	0	1
2010	30	35	5	7	2		0	0	1	0	pf-	0	1	0	1
2010	44	35	5	7	1		0	0	1	0	pf-	0	1	0	1
2010	46	36	5	7	2		0	0	1	0	pf-	0	1	0	1
2011	1	37	5	7	2		0	0	1	0	pf-	0	1	0	1
2009	24	38	5	7	2	34.8	0	0	1	0	pf-	0	1	0	1
2011	17	38	5	7	1		0	0	1	0	pf-	0	1	0	1
2010	48	39	5	7	2		0	0	1	0	0	0	1	0	1
2010	47	41	6	7	2		0	0	1	0	pf-	0	1	0	1
2010	47	42	6	7	2		0	0	1	0	pf-	0	1	0	1
2010	47	43	6	7	2		0	0	1	0	pf-	0	1	0	1
2010	47	43	6	7	1		0	0	1	0	pf-	0	1	0	1
2011	13	43	6	7	2		0	0	1	0	pf-	0	1	0	1
2010	17	45	6	7	1		0	0	1	0	tr(-)	0	1	0	1
2010	38	45	6	7	2		0	0	1	0	pf-	0	1	0	1
2010	45	45	6	7	2		0	0	1	0	pf-	0	1	0	1
2011	3	47	6	7	2		0	0	1	0	0	0	1	0	1
2009	23	50	6	8	2	34	0	0	1	0	pf-	0	1	0	1
2010	44	52	6	8	1		0	0	1	0	pf-	0	1	0	1
2010	45	55	6	8	2		0	0	1	0	pf-	0	1	0	1
2010	28	55	6	8	2		0	0	1	0	pf-	0	1	0	1
2011	2	55	6	8	2		0	0	1	0	0	0	1	0	1
2011	3	55	6	8	2		0	0	1	0	0	0	1	0	1
2011	11	58	6	8	1		0	0	1	0	pf-	0	1	0	1
2010	43	62	6	8	1		0	0	1	0	pf-	0	1	0	1
2010	51	63	6	8	2		0	0	1	0	pf-	0	1	0	1
2010	32	64	6	8	2		0	0	1	0	pf-	0	1	0	1
2010	51	64	6	8	2		0	0	1	0	pf-	0	1	0	1
2010	28	64	6	8	2		0	0	1	0	pf-	0	1	0	1
2011	18	64	6	8	2		0	0	1	0	pf-	0	1	0	1
2010	43	66	6	8	2		0	0	1	0	pf-	0	1	0	1
2010	43	69	6	8	2		0	0	1	0	pf-	0	1	0	1
2011	14	69	6	8	2		0	0	1	0	pf-	0	1	0	1
2011	12	76	6	8	1		0	0	1	0	pf-	0	1	0	1
2010	50	77	6	8	1		0	0	1	0	pf-	0	1	0	1
2010	17	0.5	1	1	1	37	0	1	1	0	tr(-)	0	1	0	1
2010	17	0.5	1	1	1	36.8	0	1	1	0	tr(-)	0	1	0	1
2009	13	0.583333	1	1	1	37	0	1	1	0	tr(-)	0	1	0	1
2010	14	0.75	1	1	1	37.4	0	1	1	0	pf-	0	1	0	1
2010	14	1	2	2	1	37.4	0	1	1	0	pf-	0	1	0	1
2010	12	1.16667	2	2	1	36.9	0	1	1	0	pf-	0	1	0	1
2010	13	1.41667	2	2	2	36.7	0	1	1	0	pf-	0	1	0	1
2010	16	1.5	2	2	2	37	0	1	1	0	tr(-)	0	1	0	1
2009	24	2	2	2	2	37.1	0	1	1	0	pf-	0	1	0	1
2010	36	2	2	2	1	37.4	0	1	1	0	pf-	0	1	0	1
2009	25	3	2	2	2	36.9	0	1	1	0	pf-	0	1	0	1
2009	41	3	2	2	1	37.5	0	1	1	0	pf-	0	1	0	1
2009	13	4	2	2	1	36.9	0	1	1	0	tr(-)	0	1	0	1
2009	41	4	2	2	1	37.5	0	1	1	0	pf-	0	1	0	1
2010	9	4	2	2	2	36.2	0	1	1	0	pf-	0	1	0	1
2010	15	5	3	3	2	36.6	0	1	1	0	pf-	0	1	0	1
2010	9	7	3	3	1	36.2	0	1	1	0	pf-	0	1	0	1
2010	18	8	3	3	1	36.2	0	1	1	0	pf-	0	1	0	1
2010	41	8	3	3	1	36.6	0	1	1	0	pf-	0	1	0	1
2010	16	10	4	4	1	37.3	0	1	1	0	tr(-)	0	1	0	1
2009	13	11	4	4	1	37.1	0	1	1	0	tr(-)	0	1	0	1
2010	41	11	4	4	1	36	0	1	1	0	pf-	0	1	0	1
2009	41	12	4	4	1	36.4	0	1	1	0	pf-	0	1	0	1
2009	13	13	4	4	1	37.1	0	1	1	0	tr(-)	0	1	0	1
2009	41	16	5	5	1	37.4	0	1	1	0	pf-	0	1	0	1
2010	22	16	5	5	1	36.9	0	1	1	0	pf-	0	1	0	1
2010	16	17	5	5	2	37.1	0	1	1	0	tr(-)	0	1	0	1
2010	17	17	5	5	1	36.4	0	1	1	0	tr(-)	0	1	0	1
2010	22	17	5	5	2	36.4	0	1	1	0	Nse	0	1	0	1
2010	41	17	5	5	2	36.7	0	1	1	0	pf-	0	1	0	1
2010	42	17	5	5	2	36.1	0	1	1	0	pf-	0	1	0	1
2010	36	18	5	5	1	36.7	0	1	1	0	pf-	0	1	0	1
2009	26	19	5	5	2	35.6	0	1	1	0	pf-	0	1	0	1
2010	11	19	5	5	2	36.3	0	1	1	0	pf-	0	1	0	1
2010	22	19	5	5	1	36.1	0	1	1	0	pf-	0	1	0	1
2010	37	19	5	5	2	36.1	0	1	1	0	pf-	0	1	0	1
2010	41	19	5	5	2	36.5	0	1	1	0	pf-	0	1	0	1
2010	12	19	5	5	2	36.3	0	1	1	0	pf-	0	1	0	1
2010	21	19	5	5	2	36.4	0	1	1	0	pf-	0	1	0	1
2011	3	19	5	5	2	36	0	1	1	0	0	0	1	0	1
2009	13	20	5	6	1	36.6	0	1	1	0	tr(-)	0	1	0	1
2010	9	20	5	6	2	36.4	0	1	1	0	pf-	0	1	0	1
2010	31	20	5	6	1	36.2	0	1	1	0	pf-	0	1	0	1
2011	11	20	5	6	1	36.2	0	1	1	0	pf-	0	1	0	1
2009	24	21	5	6	1	36.2	0	1	1	0	pf-	0	1	0	1
2010	14	21	5	6	2	37.1	0	1	1	0	pf-	0	1	0	1
2009	25	22	5	6	2	36.4	0	1	1	0	pf-	0	1	0	1
2010	9	22	5	6	2	36.5	0	1	1	0	pf-	0	1	0	1
2010	16	22	5	6	2	37.3	0	1	1	0	tr(-)	0	1	0	1
2009	21	23	5	6	2	36.2	0	1	1	0	pf-	0	1	0	1
2010	10	23	5	6	1	36.4	0	1	1	0	pf-	0	1	0	1
2010	19	23	5	6	2	36.7	0	1	1	0	pf-	0	1	0	1
2010	32	23	5	6	1	36.2	0	1	1	0	pf-	0	1	0	1
2010	36	23	5	6	2	36	0	1	1	0	pf-	0	1	0	1
2010	11	23	5	6	2	36	0	1	1	0	pf-	0	1	0	1
2009	19	24	5	6	1	36.1	0	1	1	0	pf-	0	1	0	1
2009	22	24	5	6	1	36.9	0	1	1	0	pf-	0	1	0	1
2010	9	24	5	6	2	37	0	1	1	0	pf-	0	1	0	1
2010	9	24	5	6	2	36.1	0	1	1	0	pf-	0	1	0	1
2010	39	24	5	6	1	36.6	0	1	1	0	pf-	0	1	0	1
2010	29	24	5	6	2	36.8	0	1	1	0	pf-	0	1	0	1
2009	13	25	5	6	2	36.9	0	1	1	0	tr(-)	0	1	0	1
2009	13	25	5	6	2	36.7	0	1	1	0	tr(-)	0	1	0	1
2010	31	25	5	6	2	37.4	0	1	1	0	pf-	0	1	0	1
2011	12	25	5	6	1	37	0	1	1	0	pf-	0	1	0	1
2010	9	26	5	6	1	36.3	0	1	1	0	pf-	0	1	0	1
2010	23	26	5	6	2	37.3	0	1	1	0	Nse	0	1	0	1
2010	42	26	5	6	2	36.2	0	1	1	0	pf-	0	1	0	1
2010	11	26	5	6	1	36	0	1	1	0	pf-	0	1	0	1
2010	40	27	5	6	2	36.1	0	1	1	0	pf-	0	1	0	1
2010	27	28	5	6	2	36	0	1	1	0	pf-	0	1	0	1
2011	3	28	5	6	2	36.2	0	1	1	0	0	0	1	0	1
2011	13	28	5	6	2	36.5	0	1	1	0	pf-	0	1	0	1
2010	9	29	5	6	1	37	0	1	1	0	pf-	0	1	0	1
2010	32	29	5	6	1	36	0	1	1	0	pf-	0	1	0	1
2010	12	29	5	6	2	36.1	0	1	1	0	pf-	0	1	0	1
2011	11	29	5	6	1	36.7	0	1	1	0	pf-	0	1	0	1
2009	13	30	5	7	1	36.5	0	1	1	0	tr(-)	0	1	0	1
2009	26	30	5	7	2	36.5	0	1	1	0	pf-	0	1	0	1
2010	16	30	5	7	2	36.4	0	1	1	0	tr(-)	0	1	0	1
2010	16	30	5	7	1	37.3	0	1	1	0	tr(-)	0	1	0	1
2010	23	30	5	7	2	36.1	0	1	1	0	Nse	0	1	0	1
2010	23	30	5	7	2	36.2	0	1	1	0	Nse	0	1	0	1
2010	37	30	5	7	2	36	0	1	1	0	pf-	0	1	0	1
2009	22	31	5	7	2	36.9	0	1	1	0	pf-	0	1	0	1
2009	24	31	5	7	1	35.2	0	1	1	0	pf-	0	1	0	1
2009	45	31	5	7	1	35.2	0	1	1	0	pf-	0	1	0	1
2009	22	32	5	7	2	35.9	0	1	1	0	pf-	0	1	0	1
2009	24	32	5	7	2	36.1	0	1	1	0	pf-	0	1	0	1
2009	45	32	5	7	2	36.1	0	1	1	0	pf-	0	1	0	1
2010	10	32	5	7	2	36	0	1	1	0	pf-	0	1	0	1
2010	18	32	5	7	2	36.1	0	1	1	0	pf-	0	1	0	1
2010	19	32	5	7	2	36.8	0	1	1	0	pf-	0	1	0	1
2010	32	32	5	7	2	36	0	1	1	0	pf-	0	1	0	1
2011	3	32	5	7	2	36	0	1	1	0	0	0	1	0	1
2009	26	33	5	7	1	35.3	0	1	1	0	pf-	0	1	0	1
2010	10	33	5	7	2	36.2	0	1	1	0	pf-	0	1	0	1
2010	13	33	5	7	2	36.1	0	1	1	0	pf-	0	1	0	1
2010	16	33	5	7	1	36.8	0	1	1	0	tr(-)	0	1	0	1
2011	2	33	5	7	2	36.4	0	1	1	0	0	0	1	0	1
2010	23	35	5	7	1	36.1	0	1	1	0	Nse	0	1	0	1
2010	40	36	5	7	2	36	0	1	1	0	pf-	0	1	0	1
2009	23	37	5	7	2	35	0	1	1	0	pf-	0	1	0	1
2010	9	37	5	7	2	36	0	1	1	0	pf-	0	1	0	1
2010	40	37	5	7	2	36.2	0	1	1	0	pf-	0	1	0	1
2010	12	37	5	7	2	37.3	0	1	1	0	pf-	0	1	0	1
2010	14	38	5	7	2	36.8	0	1	1	0	pf-	0	1	0	1
2010	39	38	5	7	1	36.3	0	1	1	0	pf-	0	1	0	1
2010	31	39	5	7	1	36	0	1	1	0	pf-	0	1	0	1
2011	12	39	5	7	2	36.2	0	1	1	0	pf-	0	1	0	1
2010	29	40	6	7	2	36.4	0	1	1	0	pf-	0	1	0	1
2010	29	41	6	7	1	36.2	0	1	1	0	pf-	0	1	0	1
2010	10	42	6	7	2	36	0	1	1	0	pf-	0	1	0	1
2010	17	42	6	7	2	36.8	0	1	1	0	tr(-)	0	1	0	1
2009	24	45	6	7	2	35.9	0	1	1	0	pf-	0	1	0	1
2010	10	45	6	7	1	36.2	0	1	1	0	pf-	0	1	0	1
2010	18	45	6	7	2	36.5	0	1	1	0	pf-	0	1	0	1
2010	31	45	6	7	1	36.5	0	1	1	0	pf-	0	1	0	1
2010	16	46	6	7	2	36.5	0	1	1	0	tr(-)	0	1	0	1
2010	40	46	6	7	2	36	0	1	1	0	pf-	0	1	0	1
2010	18	48	6	7	2	36.9	0	1	1	0	pf-	0	1	0	1
2010	32	49	6	7	1	36.1	0	1	1	0	pf-	0	1	0	1
2009	22	50	6	8	2	37.2	0	1	1	0	pf-	0	1	0	1
2009	25	50	6	8	2	36.5	0	1	1	0	pf-	0	1	0	1
2010	9	50	6	8	2	36.9	0	1	1	0	pf-	0	1	0	1
2010	16	50	6	8	2	36.3	0	1	1	0	tr(-)	0	1	0	1
2010	12	50	6	8	2	36	0	1	1	0	pf-	0	1	0	1
2010	26	50	6	8	2	36.4	0	1	1	0	pf-	0	1	0	1
2009	41	52	6	8	1	36.2	0	1	1	0	pf-	0	1	0	1
2010	11	53	6	8	1	36.8	0	1	1	0	pf-	0	1	0	1
2010	14	54	6	8	2	36.4	0	1	1	0	pf-	0	1	0	1
2010	16	54	6	8	1	36.8	0	1	1	0	tr(-)	0	1	0	1
2010	18	54	6	8	2	36	0	1	1	0	pf-	0	1	0	1
2010	19	54	6	8	1	37.3	0	1	1	0	pf-	0	1	0	1
2010	40	54	6	8	2	36	0	1	1	0	pf-	0	1	0	1
2010	23	55	6	8	2	37.3	0	1	1	0	Nse	0	1	0	1
2010	41	55	6	8	2	36.1	0	1	1	0	pf-	0	1	0	1
2010	27	56	6	8	2	36.2	0	1	1	0	pf-	0	1	0	1
2009	41	57	6	8	2	36.9	0	1	1	0	pf-	0	1	0	1
2009	25	58	6	8	1	35.1	0	1	1	0	pf-	0	1	0	1
2009	23	59	6	8	1	35.3	0	1	1	0	pf-	0	1	0	1
2010	42	59	6	8	2	36	0	1	1	0	pf-	0	1	0	1
2009	41	62	6	8	1	37.1	0	1	1	0	pf-	0	1	0	1
2010	41	64	6	8	2	37.3	0	1	1	0	pf-	0	1	0	1
2009	22	65	6	8	1	35.9	0	1	1	0	pf-	0	1	0	1
2010	16	65	6	8	1	36	0	1	1	0	pf-	0	1	0	1
2010	31	65	6	8	1	36	0	1	1	0	pf-	0	1	0	1
2010	38	65	6	8	2	37	0	1	1	0	pf-	0	1	0	1
2010	19	66	6	8	1	36.6	0	1	1	0	pf-	0	1	0	1
2010	37	67	6	8	2	37	0	1	1	0	pf-	0	1	0	1
2010	29	67	6	8	1	36.7	0	1	1	0	pf-	0	1	0	1
2010	10	68	6	8	2	36.2	0	1	1	0	pf-	0	1	0	1
2010	29	68	6	8	2	36.3	0	1	1	0	pf-	0	1	0	1
2010	9	69	6	8	2	36.8	0	1	1	0	pf-	0	1	0	1
2010	10	70	6	8	2	36.1	0	1	1	0	pf-	0	1	0	1
2010	33	70	6	8	1	37.1	0	1	1	0	pf-	0	1	0	1
2010	27	71	6	8	2	36.1	0	1	1	0	pf-	0	1	0	1
2010	9	72	6	8	2	36.4	0	1	1	0	pf-	0	1	0	1
2010	37	72	6	8	2	36.7	0	1	1	0	pf-	0	1	0	1
2009	41	73	6	8	1	37.4	0	1	1	0	pf-	0	1	0	1
2010	9	73	6	8	1	36	0	1	1	0	pf-	0	1	0	1
2010	14	73	6	8	1	37.5	0	1	1	0	pf-	0	1	0	1
2010	17	73	6	8	2	37	0	1	1	0	tr(-)	0	1	0	1
2009	23	76	6	8	1	35.5	0	1	1	0	pf-	0	1	0	1
2010	9	76	6	8	1	36.7	0	1	1	0	pf-	0	1	0	1
2010	18	79	6	8	1	37.1	0	1	1	0	pf-	0	1	0	1
2010	37	79	6	8	1	37	0	1	1	0	pf-	0	1	0	1
2010	48	2	2	2	2		0	0	0	1	0	0	1	0	1
2010	17	5	3	3	1		0	0	0	1	tr(-)	0	1	0	1
2011	12	6	3	3	2		0	0	0	1	pf-	0	1	0	1
2011	1	11	4	4	2		0	0	0	1	pf-	0	1	0	1
2010	46	13	4	4	1		0	0	0	1	pf-	0	1	0	1
2011	18	14	4	4	1		0	0	0	1	pf-	0	1	0	1
2011	3	17	5	5	2		0	0	0	1	0	0	1	0	1
2011	2	18	5	5	2		0	0	0	1	0	0	1	0	1
2011	12	20	5	6	2		0	0	0	1	pf-	0	1	0	1
2011	16	20	5	6	2		0	0	0	1	pf-	0	1	0	1
2010	41	32	5	7	2		0	0	0	1	pf-	0	1	0	1
2010	38	50	6	8	2		0	0	0	1	pf-	0	1	0	1
2010	44	54	6	8	2		0	0	0	1	pf-	0	1	0	1
2011	2	69	6	8	2		0	0	0	1	0	0	1	0	1
2010	45	76	6	8	1		0	0	0	1	pf-	0	1	0	1
2010	16	1.25	2	2	2	36.8	0	1	0	1	tr(-)	0	1	0	1
2010	23	1.5	2	2	2	36.5	0	1	0	1	Nse	0	1	0	1
2009	24	2.58333	2	2	2	36.5	0	1	0	1	pf-	0	1	0	1
2011	11	4	2	2	1	36.7	0	1	0	1	pf-	0	1	0	1
2010	14	10	4	4	2	36.5	0	1	0	1	pf-	0	1	0	1
2010	12	10	4	4	1	36.6	0	1	0	1	pf-	0	1	0	1
2010	36	12	4	4	1	36	0	1	0	1	pf-	0	1	0	1
2010	14	13	4	4	2	36.8	0	1	0	1	pf-	0	1	0	1
2009	21	22	5	6	2	37.5	0	1	0	1	pf-	0	1	0	1
2010	40	22	5	6	2	36.1	0	1	0	1	pf-	0	1	0	1
2011	12	26	5	6	1	36.4	0	1	0	1	pf-	0	1	0	1
2009	24	28	5	6	2	35.5	0	1	0	1	pf-	0	1	0	1
2009	45	28	5	6	2	35.5	0	1	0	1	pf-	0	1	0	1
2010	13	28	5	6	2	36.5	0	1	0	1	pf-	0	1	0	1
2010	12	36	5	7	1	36.6	0	1	0	1	pf-	0	1	0	1
2009	21	37	5	7	2	36.4	0	1	0	1	pf-	0	1	0	1
2009	23	40	6	7	2	35.5	0	1	0	1	pf-	0	1	0	1
2010	17	40	6	7	2	36.8	0	1	0	1	pf-	0	1	0	1
2009	22	45	6	7	2	35.7	0	1	0	1	pf-	0	1	0	1
2009	24	50	6	8	2	35.1	0	1	0	1	pf-	0	1	0	1
2009	45	50	6	8	2	35.1	0	1	0	1	pf-	0	1	0	1
2009	41	52	6	8	2	36.2	0	1	0	1	pf-	0	1	0	1
2010	9	54	6	8	1	36	0	1	0	1	pf-	0	1	0	1
2010	14	57	6	8	1	37.1	0	1	0	1	pf-	0	1	0	1
2010	32	67	6	8	2	36	0	1	0	1	pf-	0	1	0	1
2010	42	69	6	8	1	36.6	0	1	0	1	pf-	0	1	0	1
2011	19	0.583333	1	1	1		0	0	0	0		1	0	0	0
2010	50	2	2	2	1		0	0	0	0		1	0	0	0
2011	14	20	5	6	1		0	0	0	0		1	0	0	0
2011	7	57	6	8	2		0	0	0	0		1	0	0	0
2010	50	74	6	8	1		0	0	0	0		1	0	0	0
2010	24	75	6	8	2		0	0	0	0		1	0	0	0
2010	25	1	2	2	1	36.3	0	1	0	0		1	0	0	0
2010	7	35	5	7	2	36.6	0	1	0	0		1	0	0	0
2010	36	43	6	7	1	37	0	1	0	0		1	0	0	0
2011	6	47	6	7	2	36.6	0	1	0	0		1	0	0	0
2011	9	0.0416667	1	1	2		0	0	1	0		1	0	0	0
2010	33	0.0833333	1	1	2		0	0	1	0		1	0	0	0
2010	39	0.0833333	1	1	2		0	0	1	0		1	0	0	0
2010	39	0.0833333	1	1	1		0	0	1	0		1	0	0	0
2010	47	0.166667	1	1	1		0	0	1	0		1	0	0	0
2010	48	0.166667	1	1	2		0	0	1	0		1	0	0	0
2010	48	0.166667	1	1	1		0	0	1	0		1	0	0	0
2010	48	0.166667	1	1	1		0	0	1	0		1	0	0	0
2011	11	0.166667	1	1	1		0	0	1	0		1	0	0	0
2010	30	0.25	1	1	2		0	0	1	0		1	0	0	0
2010	44	0.25	1	1	1		0	0	1	0		1	0	0	0
2010	50	0.25	1	1	1		0	0	1	0		1	0	0	0
2011	2	0.25	1	1	2		0	0	1	0		1	0	0	0
2011	3	0.25	1	1	2		0	0	1	0		1	0	0	0
2009	27	0.333333	1	1	1	34.4	0	0	1	0		1	0	0	0
2010	47	0.333333	1	1	1		0	0	1	0		1	0	0	0
2011	2	0.333333	1	1	2		0	0	1	0		1	0	0	0
2011	16	0.333333	1	1	1		0	0	1	0		1	0	0	0
2010	34	0.416667	1	1	1		0	0	1	0		1	0	0	0
2010	52	0.416667	1	1	1		0	0	1	0		1	0	0	0
2010	52	0.416667	1	1	2		0	0	1	0		1	0	0	0
2011	3	0.416667	1	1	2		0	0	1	0		1	0	0	0
2011	16	0.416667	1	1	1		0	0	1	0		1	0	0	0
2010	41	0.5	1	1	1		0	0	1	0		1	0	0	0
2011	3	0.5	1	1	1		0	0	1	0		1	0	0	0
2011	7	0.5	1	1	2		0	0	1	0		1	0	0	0
2011	10	0.5	1	1	1		0	0	1	0		1	0	0	0
2010	45	0.583333	1	1	1		0	0	1	0		1	0	0	0
2011	2	0.583333	1	1	2		0	0	1	0		1	0	0	0
2011	2	0.583333	1	1	1		0	0	1	0		1	0	0	0
2011	6	0.583333	1	1	2		0	0	1	0		1	0	0	0
2011	8	0.583333	1	1	1		0	0	1	0		1	0	0	0
2011	10	0.583333	1	1	2		0	0	1	0		1	0	0	0
2011	11	0.583333	1	1	1		0	0	1	0		1	0	0	0
2011	14	0.583333	1	1	2		0	0	1	0		1	0	0	0
2011	3	0.666667	1	1	2		0	0	1	0		1	0	0	0
2011	18	0.666667	1	1	2		0	0	1	0		1	0	0	0
2010	50	0.75	1	1	1		0	0	1	0		1	0	0	0
2011	8	0.75	1	1	2		0	0	1	0		1	0	0	0
2011	11	0.75	1	1	2		0	0	1	0		1	0	0	0
2011	16	0.75	1	1	1		0	0	1	0		1	0	0	0
2011	3	0.833333	1	1	1		0	0	1	0		1	0	0	0
2011	7	0.833333	1	1	1		0	0	1	0		1	0	0	0
2011	8	0.833333	1	1	1		0	0	1	0		1	0	0	0
2011	14	0.833333	1	1	2		0	0	1	0		1	0	0	0
2011	15	0.833333	1	1	2		0	0	1	0		1	0	0	0
2011	18	0.833333	1	1	2		0	0	1	0		1	0	0	0
2011	20	0.833333	1	1	1		0	0	1	0		1	0	0	0
2009	37	0.916667	1	1	1	34.1	0	0	1	0		1	0	0	0
2010	46	0.916667	1	1	1		0	0	1	0		1	0	0	0
2011	15	0.916667	1	1	1		0	0	1	0		1	0	0	0
2011	19	0.916667	1	1	1		0	0	1	0		1	0	0	0
2011	5	1	1	1	1		0	0	1	0		1	0	0	0
2009	29	1	2	2	1	33.4	0	0	1	0		1	0	0	0
2010	39	1	2	2	2		0	0	1	0		1	0	0	0
2010	49	1	2	2	2		0	0	1	0		1	0	0	0
2010	28	1	2	2	2		0	0	1	0		1	0	0	0
2011	1	1	2	2	2		0	0	1	0		1	0	0	0
2011	1	1	2	2	1		0	0	1	0		1	0	0	0
2011	2	1	2	2	1		0	0	1	0		1	0	0	0
2011	5	1	2	2	2		0	0	1	0		1	0	0	0
2011	8	1	2	2	2		0	0	1	0		1	0	0	0
2011	10	1	2	2	1		0	0	1	0		1	0	0	0
2011	12	1	2	2	1		0	0	1	0		1	0	0	0
2011	15	1	2	2	1		0	0	1	0		1	0	0	0
2011	16	1	2	2	2		0	0	1	0		1	0	0	0
2011	19	1	2	2	1		0	0	1	0		1	0	0	0
2011	19	1	2	2	1		0	0	1	0		1	0	0	0
2011	16	1.16667	2	2	1		0	0	1	0		1	0	0	0
2010	28	1.25	2	2	2		0	0	1	0		1	0	0	0
2011	1	1.33333	2	2	1		0	0	1	0		1	0	0	0
2010	45	1.41667	2	2	2		0	0	1	0		1	0	0	0
2010	50	1.41667	2	2	1		0	0	1	0		1	0	0	0
2010	51	1.41667	2	2	1		0	0	1	0		1	0	0	0
2011	17	1.41667	2	2	2		0	0	1	0		1	0	0	0
2009	41	1.5	2	2	2	34.1	0	0	1	0		1	0	0	0
2010	51	1.5	2	2	1		0	0	1	0		1	0	0	0
2011	13	1.5	2	2	1		0	0	1	0		1	0	0	0
2011	19	1.5	2	2	1		0	0	1	0		1	0	0	0
2011	14	1.6	2	2	2		0	0	1	0		1	0	0	0
2010	49	1.66667	2	2	2		0	0	1	0		1	0	0	0
2011	15	1.66667	2	2	1		0	0	1	0		1	0	0	0
2010	37	1.75	2	2	2		0	0	1	0		1	0	0	0
2010	44	1.75	2	2	2		0	0	1	0		1	0	0	0
2010	49	1.75	2	2	2		0	0	1	0		1	0	0	0
2011	10	1.75	2	2	2		0	0	1	0		1	0	0	0
2011	16	1.75	2	2	1		0	0	1	0		1	0	0	0
2009	37	2	2	2	2	34.2	0	0	1	0		1	0	0	0
2010	16	2	2	2	1		0	0	1	0		1	0	0	0
2010	34	2	2	2	2		0	0	1	0		1	0	0	0
2010	38	2	2	2	1		0	0	1	0		1	0	0	0
2010	39	2	2	2	1		0	0	1	0		1	0	0	0
2010	41	2	2	2	2		0	0	1	0		1	0	0	0
2010	41	2	2	2	2		0	0	1	0		1	0	0	0
2010	43	2	2	2	2		0	0	1	0		1	0	0	0
2010	43	2	2	2	2		0	0	1	0		1	0	0	0
2010	44	2	2	2	2		0	0	1	0		1	0	0	0
2010	44	2	2	2	1		0	0	1	0		1	0	0	0
2010	44	2	2	2	1		0	0	1	0		1	0	0	0
2010	44	2	2	2	1		0	0	1	0		1	0	0	0
2010	44	2	2	2	2		0	0	1	0		1	0	0	0
2010	45	2	2	2	2		0	0	1	0		1	0	0	0
2010	48	2	2	2	1		0	0	1	0		1	0	0	0
2010	49	2	2	2	2		0	0	1	0		1	0	0	0
2010	50	2	2	2	1		0	0	1	0		1	0	0	0
2010	50	2	2	2	2		0	0	1	0		1	0	0	0
2010	50	2	2	2	2		0	0	1	0		1	0	0	0
2010	28	2	2	2	1		0	0	1	0		1	0	0	0
2010	28	2	2	2	1		0	0	1	0		1	0	0	0
2011	2	2	2	2	2		0	0	1	0		1	0	0	0
2011	3	2	2	2	2		0	0	1	0		1	0	0	0
2011	3	2	2	2	1		0	0	1	0		1	0	0	0
2011	3	2	2	2	1		0	0	1	0		1	0	0	0
2011	4	2	2	2	1		0	0	1	0		1	0	0	0
2011	7	2	2	2	2		0	0	1	0		1	0	0	0
2011	8	2	2	2	1		0	0	1	0		1	0	0	0
2011	8	2	2	2	1		0	0	1	0		1	0	0	0
2011	9	2	2	2	1		0	0	1	0		1	0	0	0
2011	10	2	2	2	2		0	0	1	0		1	0	0	0
2011	11	2	2	2	1		0	0	1	0		1	0	0	0
2011	13	2	2	2	2		0	0	1	0		1	0	0	0
2011	14	2	2	2	2		0	0	1	0		1	0	0	0
2011	16	2	2	2	2		0	0	1	0		1	0	0	0
2011	17	2	2	2	2		0	0	1	0		1	0	0	0
2011	2	2.41667	2	2	1		0	0	1	0		1	0	0	0
2009	24	3	2	2	1	34.3	0	0	1	0		1	0	0	0
2010	10	3	2	2	2	34.7	0	0	1	0		1	0	0	0
2010	38	3	2	2	2		0	0	1	0		1	0	0	0
2010	40	3	2	2	2		0	0	1	0		1	0	0	0
2010	44	3	2	2	2		0	0	1	0		1	0	0	0
2010	46	3	2	2	2		0	0	1	0		1	0	0	0
2010	46	3	2	2	2		0	0	1	0		1	0	0	0
2010	47	3	2	2	1		0	0	1	0		1	0	0	0
2010	47	3	2	2	1		0	0	1	0		1	0	0	0
2010	49	3	2	2	2		0	0	1	0		1	0	0	0
2010	50	3	2	2	1		0	0	1	0		1	0	0	0
2010	51	3	2	2	2		0	0	1	0		1	0	0	0
2010	27	3	2	2	2		0	0	1	0		1	0	0	0
2010	28	3	2	2	1		0	0	1	0		1	0	0	0
2010	30	3	2	2	2		0	0	1	0		1	0	0	0
2011	1	3	2	2	2		0	0	1	0		1	0	0	0
2011	4	3	2	2	2		0	0	1	0		1	0	0	0
2011	4	3	2	2	2		0	0	1	0		1	0	0	0
2011	10	3	2	2	2		0	0	1	0		1	0	0	0
2011	16	3	2	2	2		0	0	1	0		1	0	0	0
2011	20	3	2	2	2		0	0	1	0		1	0	0	0
2011	20	3	2	2	2		0	0	1	0		1	0	0	0
2011	21	3	2	2	2		0	0	1	0		1	0	0	0
2011	19	3.75	2	2	2		0	0	1	0		1	0	0	0
2010	43	4	2	2	1		0	0	1	0		1	0	0	0
2010	44	4	2	2	2		0	0	1	0		1	0	0	0
2010	45	4	2	2	2		0	0	1	0		1	0	0	0
2010	45	4	2	2	2		0	0	1	0		1	0	0	0
2010	45	4	2	2	2		0	0	1	0		1	0	0	0
2010	49	4	2	2	2		0	0	1	0		1	0	0	0
2010	52	4	2	2	2		0	0	1	0		1	0	0	0
2010	28	4	2	2	2		0	0	1	0		1	0	0	0
2010	28	4	2	2	1		0	0	1	0		1	0	0	0
2011	2	4	2	2	1		0	0	1	0		1	0	0	0
2011	3	4	2	2	1		0	0	1	0		1	0	0	0
2011	4	4	2	2	2		0	0	1	0		1	0	0	0
2011	5	4	2	2	1		0	0	1	0		1	0	0	0
2011	10	4	2	2	2		0	0	1	0		1	0	0	0
2011	12	4	2	2	1		0	0	1	0		1	0	0	0
2011	15	4	2	2	2		0	0	1	0		1	0	0	0
2011	16	4	2	2	2		0	0	1	0		1	0	0	0
2011	19	4	2	2	2		0	0	1	0		1	0	0	0
2011	19	4	2	2	1		0	0	1	0		1	0	0	0
2011	20	4	2	2	2		0	0	1	0		1	0	0	0
2009	21	5	3	3	2	34.5	0	0	1	0		1	0	0	0
2010	16	5	3	3	2		0	0	1	0		1	0	0	0
2010	16	5	3	3	1		0	0	1	0		1	0	0	0
2010	30	5	3	3	2		0	0	1	0		1	0	0	0
2010	40	5	3	3	1		0	0	1	0		1	0	0	0
2010	44	5	3	3	2		0	0	1	0		1	0	0	0
2010	44	5	3	3	2		0	0	1	0		1	0	0	0
2010	47	5	3	3	2		0	0	1	0		1	0	0	0
2010	28	5	3	3	1		0	0	1	0		1	0	0	0
2010	28	5	3	3	2		0	0	1	0		1	0	0	0
2011	1	5	3	3	1		0	0	1	0		1	0	0	0
2011	12	5	3	3	1		0	0	1	0		1	0	0	0
2011	13	5	3	3	2		0	0	1	0		1	0	0	0
2011	14	5	3	3	2		0	0	1	0		1	0	0	0
2011	16	5	3	3	2		0	0	1	0		1	0	0	0
2011	17	5	3	3	2		0	0	1	0		1	0	0	0
2011	18	5	3	3	2		0	0	1	0		1	0	0	0
2011	2	6	3	3	1		0	0	1	0		1	0	0	0
2011	6	6	3	3	1		0	0	1	0		1	0	0	0
2011	8	6	3	3	2		0	0	1	0		1	0	0	0
2011	11	6	3	3	2		0	0	1	0		1	0	0	0
2011	12	6	3	3	2		0	0	1	0		1	0	0	0
2011	17	6	3	3	1		0	0	1	0		1	0	0	0
2011	17	6	3	3	2		0	0	1	0		1	0	0	0
2010	43	7	3	3	2		0	0	1	0		1	0	0	0
2010	44	7	3	3	2		0	0	1	0		1	0	0	0
2010	48	7	3	3	2		0	0	1	0		1	0	0	0
2010	49	7	3	3	1		0	0	1	0		1	0	0	0
2010	49	7	3	3	2		0	0	1	0		1	0	0	0
2010	28	7	3	3	2		0	0	1	0		1	0	0	0
2011	3	7	3	3	2		0	0	1	0		1	0	0	0
2011	8	7	3	3	2		0	0	1	0		1	0	0	0
2011	14	7	3	3	2		0	0	1	0		1	0	0	0
2011	16	7	3	3	1		0	0	1	0		1	0	0	0
2011	20	7	3	3	1		0	0	1	0		1	0	0	0
2010	16	8	3	3	1		0	0	1	0		1	0	0	0
2010	38	8	3	3	2		0	0	1	0		1	0	0	0
2010	47	8	3	3	1		0	0	1	0		1	0	0	0
2010	49	8	3	3	2		0	0	1	0		1	0	0	0
2010	50	8	3	3	2		0	0	1	0		1	0	0	0
2011	14	8	3	3	2		0	0	1	0		1	0	0	0
2011	14	8	3	3	1		0	0	1	0		1	0	0	0
2011	17	8	3	3	1		0	0	1	0		1	0	0	0
2011	17	8	3	3	1		0	0	1	0		1	0	0	0
2010	42	9	3	3	1		0	0	1	0		1	0	0	0
2010	28	9	3	3	2		0	0	1	0		1	0	0	0
2009	34	10	4	4	1	34.7	0	0	1	0		1	0	0	0
2010	37	10	4	4	2		0	0	1	0		1	0	0	0
2010	42	10	4	4	2		0	0	1	0		1	0	0	0
2010	50	10	4	4	2		0	0	1	0		1	0	0	0
2010	52	10	4	4	1		0	0	1	0		1	0	0	0
2010	28	10	4	4	2		0	0	1	0		1	0	0	0
2011	2	10	4	4	2		0	0	1	0		1	0	0	0
2011	2	10	4	4	2		0	0	1	0		1	0	0	0
2011	5	10	4	4	2		0	0	1	0		1	0	0	0
2011	5	10	4	4	2		0	0	1	0		1	0	0	0
2011	9	10	4	4	1		0	0	1	0		1	0	0	0
2011	19	10	4	4	1		0	0	1	0		1	0	0	0
2011	21	10	4	4	1		0	0	1	0		1	0	0	0
2010	43	11	4	4	2		0	0	1	0		1	0	0	0
2010	28	11	4	4	2		0	0	1	0		1	0	0	0
2011	1	11	4	4	2		0	0	1	0		1	0	0	0
2011	8	11	4	4	1		0	0	1	0		1	0	0	0
2010	44	12	4	4	2		0	0	1	0		1	0	0	0
2010	45	12	4	4	1		0	0	1	0		1	0	0	0
2010	51	12	4	4	2		0	0	1	0		1	0	0	0
2011	4	12	4	4	2		0	0	1	0		1	0	0	0
2011	15	12	4	4	2		0	0	1	0		1	0	0	0
2011	16	12	4	4	2		0	0	1	0		1	0	0	0
2011	16	12	4	4	2		0	0	1	0		1	0	0	0
2011	17	12	4	4	1		0	0	1	0		1	0	0	0
2011	18	12	4	4	1		0	0	1	0		1	0	0	0
2009	32	13	4	4	1	34.2	0	0	1	0		1	0	0	0
2010	41	13	4	4	1		0	0	1	0		1	0	0	0
2010	43	13	4	4	1		0	0	1	0		1	0	0	0
2010	51	13	4	4	2		0	0	1	0		1	0	0	0
2010	52	13	4	4	1		0	0	1	0		1	0	0	0
2011	18	13	4	4	2		0	0	1	0		1	0	0	0
2011	21	13	4	4	2		0	0	1	0		1	0	0	0
2010	6	14	4	4	1		0	0	1	0		1	0	0	0
2011	4	14	4	4	1		0	0	1	0		1	0	0	0
2011	9	14	4	4	2		0	0	1	0		1	0	0	0
2011	16	14	4	4	1		0	0	1	0		1	0	0	0
2011	21	14	4	4	1		0	0	1	0		1	0	0	0
2011	21	14	4	4	1		0	0	1	0		1	0	0	0
2010	37	15	5	5	1		0	0	1	0		1	0	0	0
2010	40	15	5	5	2		0	0	1	0		1	0	0	0
2010	41	15	5	5	2		0	0	1	0		1	0	0	0
2010	51	15	5	5	1		0	0	1	0		1	0	0	0
2011	1	15	5	5	1		0	0	1	0		1	0	0	0
2011	2	15	5	5	2		0	0	1	0		1	0	0	0
2011	14	15	5	5	1		0	0	1	0		1	0	0	0
2011	16	15	5	5	1		0	0	1	0		1	0	0	0
2011	18	15	5	5	1		0	0	1	0		1	0	0	0
2009	13	16	5	5	2		0	0	1	0		1	0	0	0
2009	25	16	5	5	2	34.4	0	0	1	0		1	0	0	0
2010	16	16	5	5	2		0	0	1	0		1	0	0	0
2010	44	16	5	5	1		0	0	1	0		1	0	0	0
2010	46	16	5	5	1		0	0	1	0		1	0	0	0
2010	50	16	5	5	1		0	0	1	0		1	0	0	0
2010	30	16	5	5	2		0	0	1	0		1	0	0	0
2011	1	16	5	5	2		0	0	1	0		1	0	0	0
2011	4	16	5	5	1		0	0	1	0		1	0	0	0
2011	9	16	5	5	1		0	0	1	0		1	0	0	0
2011	19	16	5	5	1		0	0	1	0		1	0	0	0
2010	43	17	5	5	2		0	0	1	0		1	0	0	0
2010	44	17	5	5	1		0	0	1	0		1	0	0	0
2010	48	17	5	5	1		0	0	1	0		1	0	0	0
2011	1	17	5	5	2		0	0	1	0		1	0	0	0
2011	3	17	5	5	1		0	0	1	0		1	0	0	0
2011	11	17	5	5	2		0	0	1	0		1	0	0	0
2011	15	17	5	5	1		0	0	1	0		1	0	0	0
2011	18	17	5	5	2		0	0	1	0		1	0	0	0
2011	21	17	5	5	2		0	0	1	0		1	0	0	0
2011	21	17	5	5	2		0	0	1	0		1	0	0	0
2009	29	18	5	5	2	34.1	0	0	1	0		1	0	0	0
2010	39	18	5	5	2		0	0	1	0		1	0	0	0
2010	40	18	5	5	1		0	0	1	0		1	0	0	0
2010	42	18	5	5	1		0	0	1	0		1	0	0	0
2010	44	18	5	5	1		0	0	1	0		1	0	0	0
2010	45	18	5	5	2		0	0	1	0		1	0	0	0
2010	46	18	5	5	2		0	0	1	0		1	0	0	0
2011	11	18	5	5	2		0	0	1	0		1	0	0	0
2011	15	18	5	5	1		0	0	1	0		1	0	0	0
2011	15	18	5	5	2		0	0	1	0		1	0	0	0
2011	18	18	5	5	2		0	0	1	0		1	0	0	0
2011	18	18	5	5	1		0	0	1	0		1	0	0	0
2011	20	18	5	5	2		0	0	1	0		1	0	0	0
2010	34	19	5	5	2		0	0	1	0		1	0	0	0
2010	43	19	5	5	2		0	0	1	0		1	0	0	0
2010	44	19	5	5	2		0	0	1	0		1	0	0	0
2010	49	19	5	5	1		0	0	1	0		1	0	0	0
2010	49	19	5	5	1		0	0	1	0		1	0	0	0
2010	51	19	5	5	2		0	0	1	0		1	0	0	0
2010	28	19	5	5	1		0	0	1	0		1	0	0	0
2011	1	19	5	5	1		0	0	1	0		1	0	0	0
2011	8	19	5	5	2		0	0	1	0		1	0	0	0
2011	10	19	5	5	1		0	0	1	0		1	0	0	0
2011	14	19	5	5	1		0	0	1	0		1	0	0	0
2011	14	19	5	5	1		0	0	1	0		1	0	0	0
2011	15	19	5	5	2		0	0	1	0		1	0	0	0
2011	19	19	5	5	1		0	0	1	0		1	0	0	0
2009	13	20	5	6	2		0	0	1	0		1	0	0	0
2009	13	20	5	6	1		0	0	1	0		1	0	0	0
2009	13	20	5	6	1		0	0	1	0	transferido	1	0	0	0
2010	38	20	5	6	2		0	0	1	0		1	0	0	0
2010	39	20	5	6	2		0	0	1	0		1	0	0	0
2010	41	20	5	6	1		0	0	1	0		1	0	0	0
2010	47	20	5	6	2		0	0	1	0		1	0	0	0
2010	49	20	5	6	2		0	0	1	0		1	0	0	0
2010	50	20	5	6	1		0	0	1	0		1	0	0	0
2010	28	20	5	6	2		0	0	1	0		1	0	0	0
2011	1	20	5	6	1		0	0	1	0		1	0	0	0
2011	4	20	5	6	2		0	0	1	0		1	0	0	0
2011	14	20	5	6	1		0	0	1	0		1	0	0	0
2009	27	21	5	6	1	33.7	0	0	1	0		1	0	0	0
2009	29	21	5	6	2	33	0	0	1	0		1	0	0	0
2010	45	21	5	6	2		0	0	1	0		1	0	0	0
2010	50	21	5	6	1		0	0	1	0		1	0	0	0
2010	16	22	5	6	2		0	0	1	0		1	0	0	0
2010	31	22	5	6	2		0	0	1	0		1	0	0	0
2010	41	22	5	6	2		0	0	1	0		1	0	0	0
2010	44	22	5	6	2		0	0	1	0		1	0	0	0
2010	49	22	5	6	2		0	0	1	0		1	0	0	0
2010	50	22	5	6	1		0	0	1	0		1	0	0	0
2010	28	22	5	6	2		0	0	1	0		1	0	0	0
2011	10	22	5	6	2		0	0	1	0		1	0	0	0
2011	11	22	5	6	1		0	0	1	0		1	0	0	0
2011	15	22	5	6	1		0	0	1	0		1	0	0	0
2011	15	22	5	6	1		0	0	1	0		1	0	0	0
2011	20	22	5	6	1		0	0	1	0		1	0	0	0
2010	43	23	5	6	2		0	0	1	0		1	0	0	0
2010	45	23	5	6	1		0	0	1	0		1	0	0	0
2010	47	23	5	6	2		0	0	1	0		1	0	0	0
2010	48	23	5	6	2		0	0	1	0		1	0	0	0
2010	49	23	5	6	2		0	0	1	0		1	0	0	0
2010	28	23	5	6	1		0	0	1	0		1	0	0	0
2010	30	23	5	6	1		0	0	1	0		1	0	0	0
2011	2	23	5	6	2		0	0	1	0		1	0	0	0
2011	2	23	5	6	2		0	0	1	0		1	0	0	0
2011	3	23	5	6	2		0	0	1	0		1	0	0	0
2011	4	23	5	6	1		0	0	1	0		1	0	0	0
2011	4	23	5	6	1		0	0	1	0		1	0	0	0
2011	8	23	5	6	2		0	0	1	0		1	0	0	0
2011	9	23	5	6	1		0	0	1	0		1	0	0	0
2011	12	23	5	6	2		0	0	1	0		1	0	0	0
2011	14	23	5	6	1		0	0	1	0		1	0	0	0
2011	14	23	5	6	1		0	0	1	0		1	0	0	0
2011	16	23	5	6	1		0	0	1	0		1	0	0	0
2011	17	23	5	6	2		0	0	1	0		1	0	0	0
2011	18	23	5	6	2		0	0	1	0		1	0	0	0
2011	18	23	5	6	2		0	0	1	0		1	0	0	0
2011	19	23	5	6	1		0	0	1	0		1	0	0	0
2011	21	23	5	6	2		0	0	1	0		1	0	0	0
2010	45	24	5	6	1		0	0	1	0		1	0	0	0
2010	46	24	5	6	2		0	0	1	0		1	0	0	0
2010	47	24	5	6	2		0	0	1	0		1	0	0	0
2011	12	24	5	6	1		0	0	1	0		1	0	0	0
2011	14	24	5	6	1		0	0	1	0		1	0	0	0
2011	18	24	5	6	1		0	0	1	0		1	0	0	0
2009	13	25	5	6	2		0	0	1	0		1	0	0	0
2009	13	25	5	6	1		0	0	1	0		1	0	0	0
2009	27	25	5	6	2	34.6	0	0	1	0		1	0	0	0
2009	29	25	5	6	2	33.9	0	0	1	0		1	0	0	0
2009	30	25	5	6	1	34.9	0	0	1	0		1	0	0	0
2010	41	25	5	6	2		0	0	1	0		1	0	0	0
2010	44	25	5	6	1		0	0	1	0		1	0	0	0
2010	44	25	5	6	2		0	0	1	0		1	0	0	0
2010	45	25	5	6	1		0	0	1	0		1	0	0	0
2010	46	25	5	6	2		0	0	1	0		1	0	0	0
2010	46	25	5	6	2		0	0	1	0		1	0	0	0
2010	49	25	5	6	2		0	0	1	0		1	0	0	0
2010	49	25	5	6	2		0	0	1	0		1	0	0	0
2010	50	25	5	6	1		0	0	1	0		1	0	0	0
2010	51	25	5	6	2		0	0	1	0		1	0	0	0
2011	5	25	5	6	2		0	0	1	0		1	0	0	0
2011	8	25	5	6	1		0	0	1	0		1	0	0	0
2011	9	25	5	6	2		0	0	1	0		1	0	0	0
2011	9	25	5	6	2		0	0	1	0		1	0	0	0
2011	13	25	5	6	1		0	0	1	0		1	0	0	0
2011	16	25	5	6	2		0	0	1	0		1	0	0	0
2011	21	25	5	6	1		0	0	1	0		1	0	0	0
2010	38	26	5	6	1		0	0	1	0		1	0	0	0
2010	41	26	5	6	1		0	0	1	0		1	0	0	0
2010	42	26	5	6	2		0	0	1	0		1	0	0	0
2010	45	26	5	6	1		0	0	1	0		1	0	0	0
2010	48	26	5	6	1		0	0	1	0		1	0	0	0
2010	50	26	5	6	2		0	0	1	0		1	0	0	0
2010	27	26	5	6	2		0	0	1	0		1	0	0	0
2010	30	26	5	6	1		0	0	1	0		1	0	0	0
2010	30	26	5	6	1		0	0	1	0		1	0	0	0
2011	2	26	5	6	1		0	0	1	0		1	0	0	0
2011	10	26	5	6	2		0	0	1	0		1	0	0	0
2011	16	26	5	6	2		0	0	1	0		1	0	0	0
2011	18	26	5	6	1		0	0	1	0		1	0	0	0
2011	19	26	5	6	2		0	0	1	0		1	0	0	0
2011	20	26	5	6	1		0	0	1	0		1	0	0	0
2011	20	26	5	6	2		0	0	1	0		1	0	0	0
2010	44	27	5	6	2		0	0	1	0		1	0	0	0
[truncated: 2,309 more rows]
