# Supplementary material for: Malaria prevalence and incidence in an isolated, meso-endemic area of Mozambique
Source: PeerJ. 2015 Nov 5;3:e1370. doi: 10.7717/peerj.1370 (PMC4647567; doi:10.7717/peerj.1370)
Supplement: Data S4 [file peerj-03-1370-s006.xlsx]

## Sheet: Visitors
Date	Day	Month	Year	Week number	Time	YEARWEEK	Casa	PIN	Age	Age group	Sexo	Temp	Peso	fever	no fever	used net	no net	Sintomas	Tratamento	Residence	urban	rural	Result	Diagnosed	Testresult	Confirmed	Neg
	22	10	2010	41		201041			0.0833333	1	1	36.2		0	1	1	0			cuguana	1	0			0
	28	8	2009	34		200934			0.25	1	1	36.4	14.5	0	1	1	0	tosse	7a3	inhambane	1	0			0
	15	8	2010	31		201031			0.25	1	1	37.3		0	1	1	0			kundula	1	0			0
	5	6	2010	26		201026			0.25	1	2	36.6		0	1	1	0			Maputo	1	0			0
	14	2	2010	7		201007	zb		0.333333	1	2	36	7.2	0	1			cefaleia	7a3	m`bene	1	0			0
	17	2	2010	6	0.322917	201006			0.416667	1	2	36.1	6.8	0	1	1	0	piodermite	8c15 7a3	milige	1	0			0
	26	9	2009	37	0.503472	200937			0.5	1	2	36	7	0	1	1	0	febre	7a3a	dindane	1	0			0
	19	3	2011	11		201111			0.5	1	2	36		0	1	1	0			magumbo	0	1			0
	19	3	2010	13		201013			0.5	1	1	37.1		0	1	0	1	malaria		Nhabanda	1	0	70	1	0
	23	8	2009	34	0.520833	200934			0.583333	1	2	37.5	10.2	0	1	1	0	sindromas febres	7a3a	dindane	1	0			0
	25	5	2010	19		201019			0.75	1	1	36		0	1	1	0			b.marengo	1	0			0
	1	1	2011	3		201103			0.166667	1	1	38.4		1	0	1	0			koche	0	1			0
	2	5	2010	18		201018			0.166667	1	1	38.1		1	0	1	0			koche	0	1			0
	1	4	2011	16		201116			0.416667	1	1	39		1	0	1	0	malaria		Koche	0	1	pf+	1	1	1
	5	6	2009	24	0.427083	200924			0.75	1	2	38.8	8.9	1	0	0	1	ht2	8k9 a5 7a3	koche	0	1			0
	17	4	2011	14		201114			0.166667	1	1					1	0			Morrumbene	1	0			0
	28	12	2010	51		201051			0.25	1	1					1	0			magumbo	0	1			0
	21	12	2010	50		201050			0.416667	1	2					0	1			covele	1	0			0
	20	1	2011	4		201104			0.416667	1	1					0	1			magumbo	0	1			0
	27	12	2010	51		201051			0.5	1	2					1	0			magumbo	0	1	PF1	1	1	1
	22	7	2009	29	0.322917	200929			0.583333	1	2	34.4	8.1			1	0	constipada	7a3a	dindane	1	0			0
	25	12	2010	52		201052			0.666667	1	2					1	0			magumbo	0	1			0
	10	12	2010	52		201052	z a		0.666667	1	1					1	0			maputo	1	0	PF1	1	1	1
	10	12	2010	52		201052	7688		0.666667	1	2					1	0			maputo	1	0	PF1	1	1	1
	18	12	2010	48		201048			0.75	1	2					1	0			koche	0	1			0
	19	11	2010	46		201046			0.833333	1	2					1	0			magumbane	1	0			0
	22	8	2009	31	0.413194	200931			1	2	2	36.7	9.1	0	1	0	1	pirdermite	8a7	chilaule	0	1			0
	26	2	2010	7	0.361111	201007			1	2	2	36.9	10.1	0	1	1	0	constipacao	7a3	inhambane	1	0			0
	12	7	2010	30		201030			1	2	2	36		0	1	1	0			M.Murongue	1	0	pf-	1	1		1
	16	10	2010	41		201041			1	2	1	36		0	1	1	0			miluge	1	0	pf+	1	1	1
	18	7	2009	31	0.415278	200931			1	2	2	35.7	8.7	0	1	0	1	febre	7a3	morrumbene	1	0		1	0
	3	5	2010	21		201021			1.25	2	1	36.1		0	1	1	0			Koche	0	1			0
	5	8	2009	31	0.430556	200931			1.25	2	2	36.5	10	0	1	1	0	malaria e vomitos	8k9 a5 7a3	maputo	1	0		1	0
	20	5	2011	19		201119			1.58333	2	2	37.1		0	1	1	0			Magumbo	0	1			0
	24	4	2011	15		201115			1.83333	2	2	37.5		0	1	1	0			Vilanculos	1	0			0
	24	10	2009	40	0.305556	200940			2	2	2	36.5	7.6	0	1	0	1	anorexia		A`frica do Sul	1	0			0
	21	6	2010	26		201026			2	2	2	37		0	1	0	1			Chilaule	0	1			0
	27	6	2009	24	0.444444	200924			2	2	2	35.3	10.6	0	1	0	1	sarna	exacloreto	inhambane	1	0			0
	28	8	2009	34		200934			2	2	2	36	12	0	1	0	1	urteria	7a3	inhambane	1	0			0
	29	9	2009	39	0.315972	200939			2	2	1	36.1	12.8	0	1	1	0	P.N	amoxacitina susp	inhambane	1	0			0
39963	30	11	2009	45		200945			2	2	2	35.3	10.6	0	1	0	1	sarna	exacloreto	inhambane	1	0	pf+	1	1	1
	4	4	2010	14		201014			2	2	2	37.4		0	1	1	0			koche	0	1	pf+	1	1	1
	4	4	2010	15		201015			2	2	1	37.4		0	1	1	0			koche	0	1	pf+	1	1	1
	6	6	2010	24		201024			2	2	1	37.3		0	1	1	0			koche	0	1			0
	9	8	2010	32		201032			2	2	2	37.2		0	1	1	0			koche	0	1	pf-	1	1		1
	12	9	2009	37	0.368056	200937			2	2	2	36.1	12.4	0	1	1	0	sarna infetada	8a3 exocloreto	koche	0	1			0
	16	10	2010	40		201040			2	2	2	36		0	1	1	0			koche	0	1	pf+	1	1	1
	27	6	2010	25		201025			2	2	2	36.3		0	1	1	0			magumbu	0	1			0
	6	10	2010	39		201039			2	2	2	36.2		0	1	1	0			maputo	1	0			0
	10	1	2010	1	0.347222	201001	7162		2	2	2	36.1	5.2	0	1	1	0	constipacao	7a3 8d1	maxixe	1	0			0
	15	9	2010	38		201038			2.16667	2	2	36		0	1	1	0			koche	0	1			0
	25	6	2009	25	0.402778	200925			2.41667	2	2	36	15	0	1	1	0	dermatite		agostinho neto	1	0			0
	24	3	2011	11		201111			3	2	1	36.7		0	1	0	1			cambine	0	1			0
	21	1	2010	3		201003	7338		3	2	2	36.9	9.1	0	1	1	0	malaria	coarten 7a3	chipuca	0	1			0
	26	2	2010	7	0.354167	201007			3	2	2	36.5	12.7	0	1	1	0	piodermite	8c15 7a3	inhambane	1	0			0
	15	9	2009	38	0.347917	200938			3	2	2	36.1	11.4	0	1	0	1	ht2	8k9 a5 7a3	koche	0	1			0
	27	6	2009	23	0.401389	200923			3	2	2	35.7	12.2	0	1	0	1	febre	7a3	magumbu	0	1		1	0
	27	6	2010	23		201023			3	2	1	37.1		0	1	1	0			magumbu	0	1			0
	4	3	2010	12		201012			3	2	2	36.2		0	1	1	0			Maputo	1	0			0
	10	2	2010	7	0.371528	201007			3	2	2	36.8	10.6	0	1	1	0	malaria	coarten 7a3	maxixe	1	0		1	0
	17	3	2011	13		201113			3	2	2	36		0	1	1	0			Morrumbene	1	0			0
	20	6	2009	23	0.454861	200923	zb		3	2	1	37.4	11.1	0	1	1	0	febre	7a3	panga	0	1	pf-	1	1		1
	24	6	2009	23	0.434722	200923			3	2	2	36.6	15.1	0	1	1	0	anemia	6a6	panga	0	1			0
	19	6	2010	25		201025			3.75	2	2	36		0	1	1	0			nhaconjo	1	0			0
	13	2	2010	7		201007	zb		4	2	2	36.7	16.5	0	1	1	0	malaria	coarten 7a3	m`bene	1	0		1	0
	4	3	2010	12		201012			4	2	2	37.4		0	1	0	1			Maputo	1	0			0
	5	8	2009	31	0.326389	200931			4	2	1	35.7	13	0	1	0	1	malaria ht2	8k9 7a3 a5	maputo	1	0		1	0
	5	9	2010	36		201036			4	2	2	37.2		0	1	1	0			maputo	1	0			0
	20	6	2009	23	0.459722	200923	zb		4	2	1	35.6	14.5	0	1	1	0	ht2	8k9 a5 7a3	panga	0	1		1	0
	26	4	2011	16		201116			1	2	1	40.2		1	0	1	0			Chicuque	1	0			0
	3	3	2011	13		201113			1	2	2	39.9		1	0	1	0	malaria		Koche	0	1			0
	6	10	2009	41	0.41875	200941			1	2	2	39	9.1	1	0	1	0	ht2		magumbu	0	1		1	0
	26	3	2011	9		201109			1.41667	2	2	38		1	0	1	0			chilaule	0	1			0
	10	6	2009	26	0.427778	200926			1.41667	2	2	38	9.2	1	0	1	0	3pic ht2		koche	0	1			0
	10	6	2009	26	0.472917	200926			1.5	2	2	38.6	9.5	1	0	1	0	malaria	8k9 a5 7a3	koche	0	1			0
	2	5	2010	19		201019			1.66667	2	2	39.3		1	0	1	0			koche	0	1			0
	20	5	2011	19		201119			1.83333	2	2	37.7		1	0	0	1			Magumbo	0	1			0
	27	3	2011	13		201113			2	2	1	39.2		1	0	1	0	malaria		Inhambane	1	0			0
	2	3	2011	9		201109			2	2	1	38.9		1	0	1	0			koche	0	1			0
	2	3	2011	9		201109			2	2	2	37.8		1	0	1	0			koche	0	1			0
	15	4	2011	14		201114			2	2	1	40.2		1	0	1	0			Ligogo	1	0			0
	4	3	2011	10		201110			2	2	2	38.6		1	0	1	0			maputo	1	0	22	1	0
	6	10	2010	42		201042			2	2	2	40.3		1	0	0	1			maputo	1	0	pf+	1	1	1
39963	30	2	2010	7	0.451389	201007			2.66667	2	2	40.7	13	1	0	1	0	malaria	coarten	inhambane	1	0			0
	25	1	2010	2		201002	zb		3	2	1	38.7	14.7	1	0	0	1	malaria	coarten 7a3	chicuane	1	0			0
	27	7	2010	29		201029			3	2	1	39.5		1	0	1	0	malaria		Inhambane	1	0	pf+	1	1	1
	27	7	2010	29		201029			3	2	1	37.8		1	0	1	0	malaria		Inhambane	1	0	pf+	1	1	1
	29	8	2010	34		201034			3	2	1	38.1		1	0	1	0			inhambane	1	0			0
	5	1	2010	3	0.5	201003			3	2	2	39.7	9.9	1	0	1	0	malaria	coarten 7a3	jogo	0	1	pf+	1	1	1
	18	3	2011	11		201111			3	2	2	39.1		1	0	1	0			magumbo	0	1	PF1	1	1	1
	20	6	2009	23	0.424306	200923			3	2	1	38.8	14.9	1	0	1	0	febre	7a3	panga	0	1		1	0
	10	8	2009	33	0.666667	200933			4	2	2	37.9	18.8	1	0	0	1	malaria ht2	8k9 a5 7a3	koche	0	1	pf-	1	1		1
	13	2	2010	7		201007			4	2	2	39.5	19.4	1	0	1	0	malaria	coarten 7a3	m`bene	1	0		1	0
	14	5	2010	19		201019			4	2	1	38.4		1	0	0	1			m`bene	1	0	pf+	1	1	1
	26	12	2010	49		201049			1	2	1					1	0			chicuque	1	0			0
39963	30	1	2011	1		201101			1	2	2					1	0			inhambane jm	1	0	pf+	1	1	1
	11	7	2009	29	0.347222	200929			1	2	2	33.2	9			1	0	malaria	8k9 a5 7a3	koche	0	1	pf+	1	1	1
	13	11	2010	45		201045	zb		1	2	2					1	0			m'bene	1	0			0
	18	2	2011	8		201108			1.08333	2	2					1	0			magumbo	0	1			0
	26	3	2011	11		201111			1.16667	2	2					0	1			inhambane	1	0			0
	29	1	2011	1		201101			1.41667	2	2					0	1			inhambane	1	0	pf+	1	1	1
	18	2	2011	9		201109			1.5	2	1					1	0			magumbo	0	1			0
	17	4	2011	14		201114			1.6	2	2					1	0			Morrumbene	1	0			0
	21	4	2010	16		201016			1.66667	2	2					1	0	malaria		chilaule	0	1			0
	20	4	2011	16		201116			1.66667	2	2					0	1			Magumbo	0	1			0
	1	1	2011	3		201103			2	2	2					1	0			koche	0	1	pf+	1	1	1
	18	11	2010	46		201046			2	2	2					1	0			koche	0	1			0
	15	5	2011	19		201119			2	2	1					0	1	malaria		Ligogo	1	0			0
	19	4	2011	16		201116			2	2	2					1	0			Magumbo	0	1			0
	20	4	2011	16		201116			2	2	2					0	1			Magumbo	0	1			0
	6	12	2010	50		201050			2	2	2					1	0			maputo	1	0			0
	22	12	2010	51		201051			3	2	2					1	0			covele	1	0			0
	22	12	2010	52		201052			3	2	2					0	1			covele	1	0			0
	19	1	2011	4		201104			3	2	2					1	0			magumbo	0	1			0
	4	5	2011	19		201119			3	2	1					1	0			Maputo	1	0			0
	10	12	2010	52		201052			3	2	1					0	1			maputo	1	0	pf-	1	1	1
	29	9	2010	39		201039			4	2	2					1	0			inhambane	1	0			0
	19	4	2011	15		201115			4	2	2					1	0			Magumbo	0	1			0
	4	3	2011	10		201110			4	2	1					0	1			maputo	1	0			0
	26	2	2010	7	0.375	201007			4.41667	3	1	36	14.5	0	1	1	0	piodermite	8c15	magumbu	0	1			0
	26	3	2010	11		201011			5	3	1	36.1		0	1	1	0			Bie'	1	0			0
	21	8	2009	31	0.418056	200931			5	3	1	36.4	15.5	0	1	0	1	malaria ht2 anemia	8k9 a5 7a3	chilaule	0	1			0
	26	1	2010	1	0.385417	201001			5	3	1	36.8	20.3	0	1	1	0	sarna	exacloreto	magumbu	0	1			0
	26	5	2010	19		201019			5	3	1	37.3		0	1	1	0			magumbu	0	1			0
	17	7	2009	30	0.614583	200930			5	3	2	35.9	17.5	0	1	1	0	sindroma febre anemia	6a6 7a3	morrumbene	1	0			0
	18	7	2010	30		201030			5	3	1	36		0	1	1	0			Morrumbene	1	0			0
	2	3	2010	9	0.295139	201009			6	3	2	36	17.2	0	1	0	1	anorexia	6a6 7a3	koche	0	1			0
	26	1	2010	1	0.375	201001			6	3	1	37.1	5.1	0	1	1	0	sarna	exacloreto	magumbu	0	1			0
	22	7	2009	29	0.336806	200929			7	3	1	35.2	21.3	0	1	1	0	bronquite	8a7	dindane	1	0			0
	23	7	2009	30	0.520833	200930			7	3	1	36.9	21.9	0	1	1	0	broquete	8d1	dindane	1	0	pf+	1	1	1
	26	10	2009	41	0.361111	200941			7	3	1	36	27	0	1	1	0	pn	7a3a	dindane	1	0			0
	2	4	2010	17		201017			7	3	1	36		0	1	0	1			koche	0	1			0
	26	1	2010	1	0.451389	201001			9	3	1	36.7	20.3	0	1	1	0	piodermite	8d1	magumbu	0	1			0
	11	6	2010	26		201026			4.5	3	1	39.2		1	0	0	1	malaria		Maxixe	1	0	pf+	1	1	1
	2	8	2010	31		201031			5	3	2	40		1	0	0	1			magumbu	0	1	pf+	1	1	1
	4	6	2010	22		201022			6	3	1	38.1		1	0	0	1			koche	0	1			0
	18	6	2010	23		201023	zb		8	3	1	39.8		1	0	0	1			macovane	1	0	pf+	1	1	1
	27	12	2009	52		200952			9	3	1	37.8		1	0	1	0			ilha	0	1			0
	26	12	2010	49		201049			5	3	2					1	0			furvela	0	1			0
	15	5	2011	19		201119			5	3	1					0	1			Ligogo	1	0			0
	19	4	2011	14		201114			5	3	1					1	0			Magumbo	0	1			0
	20	5	2011	21		201121			5	3	2					0	1			Magumbo	0	1			0
	19	4	2011	15		201115			7	3	2					1	0			Magumbo	0	1			0
	28	1	2011	1		201101	z a		8	3	2					1	0			inhambane	1	0			0
	13	12	2010	49		201049			8	3	1					1	0			m'bene	1	0	pf2	1	1	1
	11	12	2010	52		201052	7264		8	3	1					1	0			maputo	1	0			0
	10	9	2010	38		201038			8	3	1					0	1			matumbela	1	0			0
	26	2	2010	7	0.371528	201007	zb		10	4	1	36.3	29.5	0	1	1	0	parasitose	8i3	inhambane	1	0			0
	27	8	2010	31		201031	7023		12	4	1	36.5		0	1	0	1			inhambane	1	0	pf+	1	1	1
	3	5	2010	20		201020			12	4	1	36		0	1	1	0			koche	0	1			0
	15	9	2010	39		201039			12	4	2	36.4		0	1	1	0			koche	0	1	pf+	1	1	1
	5	9	2010	39		201039			12	4	1	36.1		0	1	1	0			magumbu	0	1			0
	15	4	2011	14		201114			14	4	2	36.4		0	1	0	1			Ligogo	1	0			0
39963	30	12	2009	52		200952			15	4	1	37.1		0	1	1	0			inhambane	1	0	pf+	1	1	1
	18	3	2011	10		201110			15	4	2	36		0	1	1	0			magumbo	0	1			0
	3	9	2010	36		201036			15	4	2	36.7		0	1	1	0			magumbu	0	1			0
39963	30	2	2010	7	0.377778	201007	zb		16	4	1	36.8	57.1	0	1	0	1	malaria	coarten 7a3	inhambane	1	0			0
	4	4	2010	15		201015			17	4	2	36		0	1	1	0			koche	0	1	pf+	1	1	1
	12	7	2010	30		201030			17	4	2	36		0	1	1	0	malaria		Koche	0	1	pf-	1	1		1
	14	5	2010	18		201018			17	4	2	36.4		0	1	1	0			m`bene	1	0			0
	18	3	2011	10		201110			17	4	1	37		0	1	1	0			magumbo	0	1			0
	20	5	2011	18		201118			17	4	2	36		0	1	1	0			Magumbo	0	1			0
	3	9	2010	36		201036			17	4	2	36.7		0	1	0	1			magumbu	0	1			0
	4	9	2010	38		201038			17	4	2	36		0	1	0	1			magumbu	0	1			0
	5	10	2009	40		200940			17	4	2	36.5	63.9	0	1	0	1	ht2		magumbu	0	1		1	0
	19	4	2010	14		201014			18	4	2	36.4		0	1	0	1			magumbo	0	1			0
	28	6	2010	25		201025			18	4	2	36		0	1	1	0			magumbu	0	1			0
	3	9	2010	36		201036			18	4	1	37		0	1	1	0			magumbu	0	1			0
	10	2	2010	7	0.354861	201007	7007		18	4	2	36.8	51	0	1	1	0	malaria	coarten 7a3	maxixe	1	0		1	0
	11	5	2010	21		201021			18	4	1	36		0	1	0	1	malaria		Maxixe	1	0	pf+	1	1	1
	26	3	2011	12		201112			10	4	2	38		1	0	0	1	malaria		Chicuque	1	0			0
	10	6	2009	26	0.479167	200926			10	4	1	37.7	28.5	1	0	1	0	estrangulo hernea. inf.dto	transferida m`bene	koche	0	1			0
	17	7	2009	30	0.489583	200930	7302		11	4	2	38	24.1	1	0	1	0	malaria ht2	8k9 a5 7a3	morrumbene	1	0		1	0
	19	3	2011	13		201113			12	4	2	38		1	0	1	0			Magumbo	0	1			0
	20	8	2010	31		201031			15	4	2	37.6		1	0	1	0			kundula	1	0			0
	26	1	2010	2	0.291667	201002			15	4	1	40.4	40.2	1	0	0	1	malaria	coarten 7a3	zavala	1	0			0
	27	7	2009	30	0.395833	200930			18	4	2	38.2	50.3	1	0	0	1	febre	7a3 8c14	inhambane	1	0	pf+	1	1	1
	29	6	2010	26		201026			18	4	1	38		1	0	1	0			magumbu	0	1			0
	6	9	2010	37		201037			19	4	1	38.9		1	0	0	1			maputo	1	0	pf+	1	1	1
	24	6	2010	26		201026			19	4	1	37.8		1	0	1	0			Xai-xai	1	0			0
	26	5	2011	18		201118			10	4	2					1	0	malaria		Chicuque	1	0			0
	11	12	2010	52		201052	z a		10	4	2					1	0			maputo	1	0			0
	22	2	2011	7		201107	7493		12	4	1					1	0			magumbo	0	1			0
	19	4	2011	14		201114			12	4	2					1	0			Magumbo	0	1			0
	26	1	2011	1		201101			13	4	1					1	0			guicobane	1	0	pf+	1	1	1
	20	4	2011	16		201116			13	4	1					0	1			Magumbo	0	1			0
	29	12	2010	52		201052			14	4	1					0	1			magumbo	0	1	PF1	1	1	1
	20	1	2011	5		201105			15	4	2					1	0			magumbo	0	1			0
	27	12	2010	51		201051			15	4	2					1	0			magumbo	0	1			0
	1	2	2011	5		201105			16	4	2					1	0			koche	0	1			0
	19	1	2011	1		201101			16	4	2					0	1			magumbo	0	1			0
	25	12	2010	49		201049			16	4	2					0	1			magumbo	0	1			0
	4	5	2011	18		201118			16	4	2					1	0			Maputo	1	0			0
	26	4	2011	15		201115			17	4	2					1	0			Furvela	0	1			0
	3	3	2011	11		201111			17	4	1					1	0			koche	0	1			0
	19	12	2010	50		201050			17	4	2					0	1			koche	0	1			0
	18	2	2011	7		201107			17	4	1					1	0			magumbo	0	1			0
	19	4	2011	14		201114			17	4	2					1	0	malaria		Magumbo	0	1	pf+	1	1	1
	19	4	2011	16		201116			17	4	2					1	0	malaria		Magumbo	0	1	pf+	1	1	1
	13	12	2010	48		201048			17	4	1					0	1			maxixe	1	0			0
39963	30	1	2011	5		201105			18	4	1					0	1			inhambane	1	0	pf-	1	1		1
39963	30	12	2010	49		201049			18	4	1					0	1			inhambane	1	0	pf+	1	1	1
	15	4	2011	16		201116			18	4	2					0	1			Ligogo	1	0			0
	15	5	2011	18		201118			18	4	2					1	0			Ligogo	1	0			0
	20	5	2011	18		201118			18	4	2					1	0			Magumbo	0	1			0
	10	1	2011	3		201103			18	4	2					1	0			maxixe	1	0			0
	11	2	2011	8		201108			18	4	1					0	1			maxixe	1	0			0
	18	7	2010	30		201030			18	4	1					1	0			Morrumbene	1	0			0
	20	6	2009	23	0.336111	200923	7079		18	4	1	33.5	61.4			1	0	ht2		panga	0	1	pf-	1	1		1
	19	9	2010	38		201038			19	4	2					0	1			macovane	1	0	pf-	1	1		1
	19	3	2011	13		201113	7144		19	4	2					1	0	malaria		Magumbo	0	1		1	0
	20	4	2011	16		201116			19	4	2					1	0			Magumbo	0	1			0
	26	3	2011	11		201111			20	5	1	36.5		0	1	1	0			chilaule	0	1			0
	27	1	2010	1	0.364583	201001			20	5	2	37.1	55.1	0	1	1	0		8f1	inhambane	1	0			0
	12	3	2011	9		201109			20	5	2	36.3		0	1	1	0			m'bene	1	0			0
	21	7	2010	27		201027			20	5	2	36.6		0	1	1	0			Magumbo	0	1			0
	25	1	2010	1	0.454861	201001			20	5	2	37.4	43.3	0	1	1	0	anorexia	6a6	magumbu	0	1			0
	4	3	2011	12		201112			20	5	1	36.1		0	1	1	0	malaria		Maputo	1	0	pf+	1	1	1
	11	5	2010	19		201019			20	5	1	36.1		0	1	1	0			maxixe	1	0			0
	26	2	2010	7	0.427778	201007			21	5	2	36.5	66	0	1	1	0	apranaricio mao esquerda	8c14 7a3	cambine	0	1			0
	27	4	2010	14		201014			21	5	2	37		0	1	1	0			inhambane	1	0			0
	1	2	2011	6		201106			21	5	2	36.6		0	1	1	0			koche	0	1			0
	4	4	2010	15		201015			21	5	2	36.6		0	1	0	1			koche	0	1	pf-	1	1		1
	10	6	2010	26		201026			21	5	2	36.9		0	1	1	0			Koche	0	1			0
	11	9	2010	36		201036			21	5	1	36		0	1	1	0			koche	0	1			0
	27	6	2010	25		201025			21	5	2	36.8		0	1	1	0			magumbu	0	1			0
	2	2	2011	6		201106			22	5	2	36.6		0	1	1	0			koche	0	1			0
	3	3	2011	10		201110			22	5	1	36.1		0	1	1	0			koche	0	1			0
	2	5	2010	19		201019			22	5	2	36.6		0	1	1	0			koche	0	1			0
	11	7	2009	29	0.438889	200929			22	5	2	35.4	47.6	0	1	1	0	amenorreia 5ms/si	8c18	koche	0	1	pf+	1	1	1
	11	8	2009	35		200935			22	5	2	36	47.3	0	1	1	0	gastrite	2a3	koche	0	1			0
	14	2	2010	8	0.393056	201008			22	5	2	36.5	46.7	0	1	0	1	leucorreia	8c1 7a3	m`bene	1	0			0
	3	12	2009	48		200948	zb		22	5	2	37.1		0	1	1	0			magumbu	0	1			0
	2	2	2010	7	0.666667	201007			23	5	2	37	52.2	0	1	0	1	malaria	coarten 7a3	koche	0	1			0
	4	4	2010	14		201014			23	5	1	36.9		0	1	1	0			koche	0	1	pf+	1	1	1
	15	8	2010	31		201031			23	5	1	36.6		0	1	1	0			macaringa	1	0	pf-	1	1		1
	3	12	2009	52		200952			23	5	2	37		0	1	1	0			mahangue	0	1			0
	4	3	2010	12		201012			23	5	2	36.5		0	1	0	1			Maputo	1	0			0
	27	3	2011	12		201112			24	5	2	37		0	1	0	1	malaria		Inhambane	1	0			0
	28	8	2009	34	0.347222	200934			24	5	1	36.6	57.4	0	1	0	1	constipada	7a3 8a1	inhambane	1	0			0
	3	3	2010	11		201011			24	5	2	36		0	1	1	0			Koche	0	1			0
	19	8	2010	31		201031			24	5	2	37		0	1	1	0			kundula	1	0			0
	13	2	2010	7		201007	zb		24	5	2	36.7	50	0	1	r!	r!	cefaleia e tosse	7a3 contrimoxazol	m`bene	1	0			0
	11	5	2010	21		201021			24	5	2	36.6		0	1	1	0	malaria		Maxixe	1	0	pf+	1	1	1
	27	8	2010	31		201031			25	5	2	36		0	1	1	0			inhambane	1	0			0
	5	10	2009	41	0.459722	200941			25	5	2	36	67.7	0	1	0	1	ht2		khonguiana	0	1	pf-	1	1		1
	12	8	2009	32	0.625	200932			25	5	2	36.3	56.3	0	1	1	0	malaria	8k9 a5 7a3	koche	0	1	pf+	1	1	1
	10	8	2009	33	0.538194	200933			25	5	2	35.3	56.3	0	1	1	0	roubadas medicamento	6a6	koche	0	1	pf-	1	1		1
	10	8	2009	33	0.701389	200933			25	5	2	36.4	64.3	0	1	0	1	Control 3	psicose? Transferido p/ m`bene	koche	0	1	pf+	1	1	1
	19	3	2011	12		201112			25	5	2	37		0	1	0	1			Magumbo	0	1			0
	21	7	2010	28		201028			25	5	2	36.7		0	1	1	0			Magumbo	0	1			0
	10	2	2010	6	0.697917	201006			25	5	1	37.2	58.6	0	1	0	1	infensao vcu do paladar	8c14 7a3	maxixe	1	0			0
	11	6	2010	26		201026			25	5	2	36.9		0	1	1	0	malaria		Maxixe	1	0	pf+	1	1	1
	24	8	2010	31		201031			25	5	1	36		0	1	0	1			Xai-xai	1	0	pf1	1	1	1
	26	3	2010	10	0.371528	201010			26	5	1	36		0	1	0	1	gastrite	2a3	inhambane	1	0			0
	5	9	2010	36		201036			26	5	2	36.3		0	1	1	0			maputo	1	0	pf+	1	1	1
	19	2	2011	7		201107			26	5	2	36.1		0	1	1	0			nhaprime linga linga	1	0	pf+	1	1	1
	24	6	2009	23	0.420139	200923	7350		26	5	1	36.2	50.3	0	1	1	0	cefaleia parasitose	8 1 3 7a3	panga	0	1			0
	23	6	2009	23		200923	7350		26	5	2	35.3	57	0	1	0	1	gastrite	2a3 7a3	panga	0	1			0
	24	3	2011	11		201111			27	5	2	36		0	1	0	1			cambine	0	1			0
	3	3	2010	12		201012			27	5	2	36.2		0	1	1	0			Koche	0	1			0
	4	4	2010	15		201015			27	5	2	36.8		0	1	0	1			koche	0	1	pf-	1	1		1
	26	1	2010	3	0.464583	201003			27	5	1	37.1	59	0	1	1	0	ferida inf. Joelho direito	penso	magumbu	0	1			0
	10	2	2010	7	0.340278	201007			27	5	1	36.7	51	0	1	1	0	malaria	coarten	maxixe	1	0		1	0
	24	3	2011	10		201110			27	5	1	37		0	1	1	0			Xai-xai	1	0			0
	27	7	2010	29		201029	7067		28	5	2	36.1		0	1	0	1	malaria		Inhambane	1	0	pf+	1	1	1
	27	6	2010	24		201024			28	5	1	36.4		0	1	0	1			inhambane	1	0			0
	1	4	2010	17		201017	7062		28	5	2	37.1		0	1	1	0			koche	0	1	pf-	1	1		1
	15	9	2009	38	0.361111	200938			28	5	2	37.3	51.2	0	1	1	0	parasitose	8i 18f1	koche	0	1			0
	18	3	2011	10		201110			28	5	2	36.5		0	1	1	0			magumbo	0	1			0
	26	2	2010	8	0.605556	201008			28	5	2	36.7	57.2	0	1	0	1	diarreia	TA 90/50 11a19	magumbu	0	1			0
	26	1	2010	1	0.381944	201001			29	5	2	37.3	68.3	0	1	1	0	sarna	exacloreto b	magumbu	0	1			0
	13	2	2010	6	0.333333	201006			29	5	2	36.4	59	0	1	0	1	malaria	coarten	milige	1	0		1	0
	24	3	2010	12		201012			29	5	1	36.6		0	1	0	1			Xai-Xai	1	0			0
	27	7	2010	27		201027	zb		30	5	2	36		0	1	1	0	malaria		Hongonhane	0	1	pf-	1	1		1
	26	2	2010	7	0.364583	201007			30	5	2	36.8	53.3	0	1	1	0	cefaleia otite m	8c14 7a3	inhambane	1	0			0
	26	3	2010	9	0.381944	201009			30	5	2	36	52.3	0	1	1	0	malaria	coarten 7a3	inhambane	1	0			0
	2	5	2010	19		201019			30	5	2	36.7		0	1	1	0			koche	0	1			0
	6	6	2009	24	0.4375	200924			30	5	2	35.5	56.4	0	1	0	1	malaria	8k9 a5	koche	0	1			0
	15	10	2010	40		201040			30	5	2	36.4		0	1	1	0			koche	0	1	pf+	1	1	1
	16	10	2009	42	0.472222	200942			30	5	2	36.8	49.1	0	1	1	0	ht2		koche	0	1	pf+	1	1	1
	12	3	2011	9		201109			30	5	1	36.3		0	1	0	1			m'bene	1	0			0
	12	3	2011	10		201110			30	5	1	37		0	1	0	1			m'bene	1	0			0
	20	5	2010	22		201022			30	5	2	37.5		0	1	1	0			Magumbo	0	1			0
	22	7	2010	28		201028			30	5	2	36.7		0	1	1	0			Magumbo	0	1			0
	27	5	2010	22		201022			30	5	2	37.5		0	1	1	0			magumbu	0	1			0
	2	3	2010	9	0.479167	201009			31	5	1	37.2	47.7	0	1	1	0	gripe	8c14 7a3	koche	0	1			0
	6	6	2010	24		201024			31	5	2	36.5		0	1	1	0			koche	0	1			0
	11	9	2009	24	0.409722	200924			31	5	2	36.1	48.4	0	1	1	0	hta 140/90+ht2	7a3 8c14	koche	0	1			0
	16	10	2009	41	0.352778	200941			31	5	2	36.9	45.3	0	1	1	0	gastrite		koche	0	1	pf+	1	1	1
	2	8	2009	33	0.395833	200933			31	5	2	35.6	59.6	0	1	1	0	aftas	8c14 7a3	magumbu	0	1			0
	17	3	2010	13		201013			31	5	1	36.3		0	1	0	1	malaria		Morrumbene	1	0	pf-	1	1		1
	17	7	2010	30		201030			31	5	1	36		0	1	0	1			Morrumbene	1	0	pf-	1	1		1
	26	8	2010	32		201032			32	5	1	37.1		0	1	1	0			gaza	1	0	pf+	1	1	1
	10	6	2009	26	0.459722	200926			32	5	2	36.8	74.3	0	1	0	1	cefaleias	7a3	koche	0	1			0
	11	7	2010	27		201027			32	5	2	37		0	1	1	0			Koche	0	1	pf-	1	1		1
	11	9	2009	35	0.419444	200935			32	5	2	36.5	104.8	0	1	1	0	obsesso	dieta	koche	0	1			0
	16	10	2010	41		201041			32	5	2	36		0	1	1	0			koche	0	1	pf+	1	1	1
	20	6	2010	26		201026			32	5	2	37		0	1	1	0			Magumbo	0	1			0
	27	6	2010	24		201024			32	5	1	37.4		0	1	1	0			magumbu	0	1			0
	9	6	2010	25		201025			32	5	1	36.8		0	1	1	0			massinga	1	0			0
	23	6	2009	23	0.438889	200923	7273		32	5	2	35.3	56.4	0	1	0	1	agrecao politrauma	7a3	panga	0	1			0
	20	6	2009	23	0.409028	200923			32	5	2	35.6	67.6	0	1	0	1	ht2	7a3	panga	0	1	pf+	1	1	1
	26	3	2011	9		201109			33	5	2	36.8		0	1	1	0			chilaule	0	1			0
	27	6	2009	24	0.447917	200924			33	5	2	36.2	61.1	0	1	0	1	sarna	exacloreto	inhambane	1	0			0
39963	30	11	2009	45		200945			33	5	2	36.2	61.1	0	1	0	1	sarna	exacloreto	inhambane	1	0			0
	10	6	2009	26	0.496528	200926			33	5	2	35.5	63.2	0	1	1	0	parasitose	8 1 3	koche	0	1			0
	18	7	2009	31	0.458333	200931			33	5	2	37.5	65.3	0	1	0	1	leucorreia	8c5 8e1	muluche	1	0			0
	26	3	2011	9		201109			34	5	1	36.2		0	1	1	0			chidenguele	1	0		1	0
	1	1	2010	3	0.326389	201003			34	5	2	37.3	53.4	0	1	1	0	lombalgia	7a3 6a6	koche	0	1	pf+	1	1	1
	3	3	2010	12		201012			34	5	2	36.2		0	1	1	0	malaria		Koche	0	1			0
	11	9	2009	35	0.40625	200935			34	5	2	36.8	58.4	0	1	1	0	leucorreia	8c5 8e1	koche	0	1			0
	16	10	2009	42	0.4375	200942			34	5	2	37	52.6	0	1	1	0	nyistentina!!		koche	0	1			0
	14	10	2009	42	0.427778	200942			34	5	2	36.6	68.4	0	1	1	0	gastrite		m`bene	1	0			0
	19	4	2010	14		201014			34	5	2	36.1		0	1	1	0			magumbo	0	1			0
	5	8	2009	31	0.329861	200931			34	5	2	35.8	61.9	0	1	0	1	malaria ht2	8k9 a5 7a3	maputo	1	0		1	0
	10	8	2009	32	0.489583	200932			34	5	2	36.9	61.9	0	1	0	1	malaria arrefirs	8k9 a5 7a3	mate	1	0		1	0
	25	12	2009	52		200952			35	5	2	37		0	1	0	1			chalambe	0	1			0
	27	7	2009	26	0.472222	200926	z a		35	5	2	36.2	65.6	0	1	1	0	ht2	8k9 a5 7a3	homoine	0	1	pf+	1	1	1
	10	8	2010	32		201032			35	5	2	36.1		0	1	1	0			koche	0	1	pf+	1	1	1
	3	8	2010	33		201033			35	5	1	36.2		0	1	1	0			magumbu	0	1			0
	9	3	2010	12		201012			35	5	2	36		0	1	0	1			Massinga	1	0	pf-	1	1		1
	11	6	2010	22		201022			35	5	2	36		0	1	1	0			maxixe	1	0	Nse	1	1		1
	24	4	2011	13		201113			35	5	1	37		0	1	1	0			Xai-Xai	1	0			0
	4	5	2010	21		201021			36	5	2	36.2		0	1	1	0			Koche	0	1			0
	4	6	2010	23		201023			36	5	2	36		0	1	1	0			koche	0	1			0
	10	6	2010	26		201026			36	5	2	36		0	1	1	0			Koche	0	1			0
	5	6	2010	26		201026			36	5	2	36		0	1	1	0			Maputo	1	0			0
	10	2	2010	7	0.348611	201007	7055		36	5	1	36.9	61.6	0	1	1	0	sinosite	7a3 8c14	maxixe	1	0			0
	24	1	2010	1	0.388889	201001			37	5	2	37.4	77.6	0	1	0	1	dermatite	8a5 c1	a`frica do Sul	1	0			0
	21	8	2009	31	0.427778	200931			37	5	1	36.8	66.3	0	1	0	1	gripe	7a3	chilaule	0	1			0
	15	10	2009	39	0.427083	200939			37	5	2	37.1	59.6	0	1	1	0	leucorreia		koche	0	1	pf+	1	1	1
	12	4	2010	13		201013			37	5	1	36.4		0	1	1	0			m'bene	1	0			0
	14	9	2009	37	0.409722	200937			37	5	1	35.4	68.4	0	1	1	0	infensao genital	8a7 7a3	m`bene	1	0			0
	14	10	2009	41	0.423611	200941			37	5	2	36.6	68.7	0	1	1	0	inf penis		m`bene	1	0			0
	20	5	2011	20		201120			37	5	2	36		0	1	1	0			Magumbo	0	1			0
	18	9	2009	24	0.402778	200924			37	5	1	35.3	66.9	0	1	1	0	gripe e tosse	7a3 8c14	morrumbene	1	0			0
	21	7	2010	27		201027	za		38	5	1	36		0	1	0	1			Chilaule	0	1			0
	21	5	2010	21		201021			38	5	1	36.9		0	1	0	1			Chilaule	0	1			0
	23	10	2010	41		201041			38	5	1	36.6		0	1	1	0			chilaule	0	1			0
	21	2	2010	6	0.361111	201006			38	5	2	36.4	55.6	0	1	1	0	malaria	coarten 7a3	chipucha	0	1			0
	27	8	2010	31		201031			38	5	2	36.5		0	1	1	0			inhambane	1	0	pf+	1	1	1
	27	8	2010	32		201032			38	5	2	36.4		0	1	1	0			inhambane	1	0			0
	27	8	2010	33		201033			38	5	2	36		0	1	1	0			inhambane	1	0			0
	29	9	2010	36		201036			38	5	2	36.6		0	1	1	0			inhambane	1	0			0
	29	10	2010	42		201042			38	5	2	36		0	1	1	0			inhambane	1	0			0
	13	1	2010	1	0.352083	201001			38	5	1	36.1	69.7	0	1	1	0	malaria	coarten 7a3	m`bene	1	0		1	0
	13	2	2010	5	0.357639	201005			38	5	2	36.5	60	0	1	1	0	hta	m3a1	m`bene	1	0			0
	14	5	2010	20		201020			38	5	1	37.3		0	1	1	0			m`bene	1	0			0
	5	7	2009	27	0.447917	200927			38	5	2	35.5	59.8	0	1	1	0	malaria	8k9 7a3 a5	maputo	1	0		1	0
	11	2	2010	8		201008	!		38	5	2	36.6	52.1	0	1	0	1	cefaleia	7a3	maxixe	1	0			0
	26	5	2009	21		200921		7210	39	5	1	36.4	84	0	1	1	0	cefalea frte ht2	8k9,7a3,a6	furuvela	0	1			0
	26	3	2011	11		201111			39	5	2	36.2		0	1	1	0			inhambane	1	0			0
	27	3	2011	12		201112			39	5	1	37		0	1	0	1	malaria		Inhambane	1	0			0
	10	6	2009	26	0.427083	200926			39	5	2	36	55.7	0	1	0	1	malaria	8k9a57a3	koche	0	1			0
	28	6	2009	26	0.361111	200926			39	5	2	35	75.4	0	1	1	0	cambalgia	d-3	magumbu	0	1			0
	22	7	2010	29		201029			20	5	2	38.7		1	0	1	0	malaria		Magumbo	0	1	pf+	1	1	1
	12	9	2009	37	0.378472	200937			21	5	2	39.9	57.2	1	0	1	0	sarna	exacloreto	koche	0	1			0
	27	4	2010	17		201017			23	5	2	37.6		1	0	1	0			ilha	0	1			0
	5	8	2010	32		201032			23	5	2	37.6		1	0	0	1			jangamo	0	1	pf+	1	1	1
	2	5	2010	18		201018			23	5	2	38.5		1	0	1	0			koche	0	1			0
	6	6	2010	24		201024			27	5	2	37.6		1	0	0	1			koche	0	1			0
	4	3	2010	9	0.541667	201009			27	5	2	38	66.2	1	0	1	0	febre	7a3	maputo	1	0		1	0
	3	5	2011	19		201119			29	5	2	39.9		1	0	1	0	malaria		Koche	0	1			0
	10	8	2009	33	0.676389	200933			31	5	2	37.8	80.8	1	0	1	0	malaria	8k9 7a3 a5	koche	0	1	pf+	1	1	1
	15	10	2009	40	0.402778	200940			34	5	2	38	53.6	1	0	1	0	leucorreia		koche	0	1	pf+	1	1	1
	19	3	2011	12		201112			35	5	1	38		1	0	1	0			Magumbo	0	1			0
	1	4	2010	17		201017			37	5	2	37.6		1	0	1	0			koche	0	1	pf+	1	1	1
	21	6	2010	26		201026			38	5	1	38.5		1	0	1	0	malaria		Chilaule	0	1			0
	21	1	2010	3		201003	7338		38	5	2	37.8	58.7	1	0	1	0	malaria	coarten 7a3	chipuca	0	1			0
	15	6	2010	22		201022			38	5	2	40		1	0	0	1			macovane	1	0	Nse	1	1		1
	3	5	2010	19		201019			39	5	2	37.7		1	0	0	1			koche	0	1			0
	29	1	2011	4		201104			20	5	2					1	0			inhambane	1	0	pf+	1	1	1
	22	1	2011	5		201105			20	5	2					1	0			magumbo	0	1			0
	11	12	2010	52		201052	z a		20	5	2					1	0			maputo	1	0			0
	3	5	2011	19		201119			21	5	2					0	1	malaria		Koche	0	1			0
	16	10	2010	43		201043			21	5	1					1	0			koche	0	1			0
	19	1	2011	4		201104			21	5	2					1	0			magumbo	0	1			0
	13	12	2010	49		201049	7707		21	5	2					1	0			maxixe	1	0	24	1	0
	26	11	2010	44		201044			22	5	2					1	0			gaza	1	0	pf+	1	1	1
	19	12	2010	49		201049			22	5	2					1	0			koche	0	1			0
	19	12	2010	50		201050			22	5	2					1	0			koche	0	1			0
	20	5	2011	21		201121			22	5	1					0	1	malaria		Magumbo	0	1		1	0
	22	12	2010	48		201048			22	5	1					1	0			magumbo	0	1	PF1	1	1	1
	10	1	2011	1		201101			22	5	1					1	0			maxixe	1	0	PF1	1	1	1
	24	4	2011	14		201114			22	5	1					1	0	malaria		Vilanculos	1	0			0
	15	2	2011	7		201107	zb		23	5	1					1	0			macovane	1	0			0
	13	12	2010	49		201049			23	5	2					1	0			maxixe	1	0			0
	27	1	2011	1		201101			24	5	2					0	1			inhambane	1	0			0
	19	4	2011	15		201115			24	5	2					1	0			Magumbo	0	1			0
	19	4	2010	16		201016			24	5	2					1	0	malaria		magumbo	0	1		1	0
	28	1	2011	1		201101			25	5	2					1	0			inhambane	1	0			0
	15	12	2010	52		201052			25	5	2					0	1			ligogo	1	0			0
	18	2	2011	8		201108			25	5	2					1	0			magumbo	0	1			0
	19	3	2011	11		201111			25	5	2					1	0			magumbo	0	1			0
	25	12	2010	52		201052			25	5	2					0	1			magumbo	0	1			0
	6	12	2010	49		201049			25	5	2					1	0			maputo	1	0	0	1	1		1
	10	1	2011	3		201103			25	5	2					1	0			maxixe	1	0			0
	25	12	2010	49		201049			25	5	1					0	1			Xai-xai	1	0			0
	25	12	2010	49		201049			25	5	1					0	1			Xai-xai	1	0			0
	26	5	2009	21		200921		7210	26	5	2		55.7			1	0	arrefir ht2		furuvela	0	1			0
39963	30	2	2011	8		201108			26	5	2					1	0			inharrime	1	0	pf+	1	1	1
	5	10	2010	40		201040			26	5	2					1	0			jangamo	0	1	pf-	1	1		1
	22	11	2010	47		201047	z a		26	5	1					1	0			magumbo	0	1			0
	13	11	2010	45		201045	z a		26	5	1					1	0			maxixe	1	0			0
	29	1	2011	1		201101	z a		27	5	1					0	1			inhambane	1	0	pf+	1	1	1
	11	8	2009	34	0.390972	200934			27	5	1	34.7	51.7			0	1	malaria	8k9 a5 7a3	maxixe	1	0		1	0
	18	7	2010	30		201030			27	5	1					1	0			Morrumbene	1	0			0
	26	4	2011	15		201115			28	5	1					1	0			Chilaule	0	1			0
	5	1	2011	1		201101			28	5	2					1	0			koche	0	1	pf+	1	1	1
	12	1	2011	3		201103			28	5	2					0	1			m'bene	1	0			0
	12	1	2011	4		201104			28	5	1					0	1			m'bene	1	0			0
	15	1	2011	2		201102	zb		28	5	1					0	1			macovane	1	0	0	1	1		1
	18	2	2011	9		201109			28	5	2					1	0			magumbo	0	1			0
	19	3	2011	12		201112			28	5	2					1	0			Magumbo	0	1			0
	22	7	2010	30		201030			28	5	1					1	0			Magumbo	0	1			0
	4	5	2011	18		201118			28	5	1					0	1			Maputo	1	0			0
	17	7	2010	29		201029			28	5	2					1	0			Morrumbene	1	0			0
	26	5	2011	18		201118			29	5	2					0	1	malaria		Chicuque	1	0			0
	29	1	2011	2		201102			29	5	1					1	0			inhambane	1	0	pf+	1	1	1
	25	11	2010	48		201048			29	5	1					1	0			Xai-xai	1	0	0	1	1		1
	19	3	2011	12		201112			30	5	2					1	0			Magumbo	0	1			0
	13	12	2010	50		201050			30	5	2					0	1			maxixe	1	0			0
	17	12	2010	50		201050			30	5	2					1	0			mongwe	0	1	pf1	1	1	1
	24	12	2010	50		201050			30	5	1					1	0			Tinga-tinga	0	1			0
	25	11	2010	48		201048			31	5	1					1	0			Xai-xai	1	0			0
	21	4	2010	16		201016			32	5	2					1	0	malaria		chilaule	0	1			0
	23	7	2009	29	0.326389	200929			32	5	2	34.3	54.7			1	0	anemia sindroma inf	6a6 7a3	dindane	1	0			0
	16	10	2010	43		201043			32	5	2					1	0			koche	0	1			0
	12	7	2010	30		201030			32	5	2					1	0			m.muronge	1	0	pf-	1	1		1
	11	4	2011	17		201117			32	5	1					1	0			Maxixe	1	0			0
	25	12	2010	49		201049			32	5	1					0	1			Xai-xai	1	0	tr(-)	1	1		1
	11	7	2009	27	0.447917	200927			33	5	2	34.6	63.3			1	0	inf.colo uterina	8a1 8c18	koche	0	1			0
	12	10	2010	42		201042			33	5	1					0	1			m'bene	1	0			0
	1	1	2011	3		201103			35	5	2					1	0			koche	0	1			0
	1	4	2011	16		201116			35	5	2					1	0			Koche	0	1	pf+	1	1	1
	18	2	2011	8		201108	zb		35	5	1					0	1			magumbo	0	1			0
	25	12	2010	52		201052	z a		35	5	2					0	1			magumbo	0	1	PF1	1	1	1
	18	2	2011	8		201108			35	5	2					0	1			magumbo	0	1			0
	19	4	2011	14		201114			35	5	1					1	0			Magumbo	0	1			0
	3	11	2010	46		201046			35	5	2					1	0			magumbu	0	1			0
	10	12	2010	52		201052	7688		35	5	2					1	0			maputo	1	0	PF1	1	1	1
39963	30	12	2010	49		201049			37	5	2					1	0			inhambane	1	0	pf+	1	1	1
	12	2	2011	6		201106			37	5	1					0	1			m'bene	1	0	14	1	0
	23	10	2010	43		201043			38	5	1					1	0			chilaule	0	1			0
	29	9	2010	38		201038			38	5	2					1	0			inhambane	1	0			0
	26	1	2011	3		201103	z a		39	5	1					1	0			chilaule	0	1		1	0
	21	5	2011	20		201120			39	5	1					1	0			Chilaule	0	1			0
	28	1	2011	1		201101	z a		39	5	2					1	0			inhambane	1	0	pf+	1	1	1
	2	11	2010	45		201045			39	5	2					1	0			magumbu	0	1			0
	5	3	2011	13		201113			40	6	1	36		0	1	1	0			Kocane 1	0	1	pf-	1	1		1
	4	6	2010	22		201022			40	6	2	36.2		0	1	0	1			maputo	1	0	pf+	1	1	1
	4	5	2011	20		201120			41	6	2	37		0	1	1	0			Maputo	1	0			0
	5	9	2010	35		201035			42	6	1	37.2		0	1	1	0			inhassoro	1	0	pf+	1	1	1
	2	3	2010	9	0.291667	201009			42	6	2	36.4	75.7	0	1	0	1	malaria	coarten 7a3	koche	0	1			0
	2	4	2010	17		201017			42	6	2	37.2		0	1	1	0			koche	0	1	pf-	1	1		1
	4	6	2010	22		201022			42	6	2	36.3		0	1	0	1			koche	0	1			0
	11	7	2009	30	0.368056	200930			42	6	2	35.9	58.8	0	1	0	1	artrite	14a3 7a3	koche	0	1	pf+	1	1	1
	15	9	2010	39		201039			42	6	2	36.9		0	1	1	0			koche	0	1	pf+	1	1	1
	26	5	2010	19		201019			42	6	2	36.5		0	1	1	0			magumbu	0	1	pf+	1	1	1
	9	12	2009	52		200952			42	6	2	36.2		0	1	1	0			maputo	1	0			0
	9	1	2010	1	0.652778	201001			42	6	2	37	47.4	0	1	1	0	malaria	coarten 7a3	massinga	1	0		1	0
	9	4	2010	14		201014			42	6	2	37		0	1	1	0			massinga	1	0			0
	23	7	2009	31	0.413194	200931			42	6	2	37	46.4	0	1	0	1	gastrite anemia	6a6 2a3	panga	0	1			0
	27	2	2010	5	0.375	201005			43	6	2	36.7	51.8	0	1	0	1	malaria	coarten 7a3	homoine	0	1	pf+	1	1	1
	5	4	2010	13		201013			43	6	1	36.1		0	1	0	1			jogo	0	1	pf+	1	1	1
	28	6	2009	26	0.338194	200926			43	6	1	36	58.5	0	1	1	0	ht2 tosse	7a3 8g4	magumbu	0	1	pf-	1	1		1
	5	9	2009	36	0.40625	200936			43	6	2	36	85.5	0	1	1	0	dores de garganta	8c14 14a3	maputo	1	0			0
	9	12	2009	52		200952			43	6	2	36.2		0	1	1	0			maputo	1	0			0
	19	6	2010	25		201025			43	6	2	36.5		0	1	1	0			nhaconjo	1	0	69	1	0
	24	7	2009	31	0.421528	200931	7229		43	6	2	35.8	62.6	0	1	0	1	alergia de medicamento	13a2 7a3	tambajane	0	1	pf-	1	1		1
	2	2	2010	7	0.451389	201007			44	6	1	36.7	57.8	0	1	1	0	malaria	coarten 7a3 6a6	koche	0	1			0
	14	6	2010	25		201025			44	6	1	37.5		0	1	1	0			m`bene	1	0			0
	9	8	2010	34		201034			45	6	2	36.7		0	1	1	0			massinga	1	0	19	1	0
	18	12	2009	52		200952			45	6	2	36.8		0	1	1	0			murongue	1	0	9	1	0
	25	1	2010	1	0.384722	201001	7057		46	6	2	36.2	57.2	0	1	1	0	malaria	coarten 7a3 6a6	magumbu	0	1		1	0
	2	5	2010	18		201018			47	6	2	36		0	1	1	0			koche	0	1			0
	26	5	2010	19		201019			47	6	2	37		0	1	0	1			magumbu	0	1			0
	11	7	2009	27	0.368056	200927	7407		48	6	2	35.3	57.4	0	1	0	1	lombalgia	14a3	koche	0	1	pf+	1	1	1
	4	5	2010	21		201021			48	6	1	36.4		0	1	1	0			Koche	0	1			0
	18	3	2011	10		201110			48	6	2	36		0	1	1	0			magumbo	0	1			0
	17	7	2009	30	0.625	200930			48	6	1	36.5	45.7	0	1	1	0	parasitose artrite	14a3 8 1 3	morrumbene	1	0			0
	24	12	2009	52		200952			48	6	2	36.4		0	1	0	1			sahane	0	1			0
	25	12	2009	51		200951			49	6	2	36.1		0	1	1	0			a`frica do Sul	1	0			0
	5	8	2009	33	0.447917	200933			49	6	2	35.7	85.2	0	1	1	0	cefaleias	7a3	maputo	1	0			0
	10	8	2010	33		201033			50	6	2	36.8		0	1	0	1			koche	0	1			0
	15	3	2009	13		200913			50	6	1	35.5		0	1	1	0	cefaleia,fraquesa	8k9,a5,7a3	macovane	1	0	trpf(+)	1	1	1
	5	8	2010	32		201032			50	6	2	36		0	1	1	0			maputo	1	0	pf+	1	1	1
	16	5	2011	21		201121			50	6	2	36.8		0	1	1	0			Miludji	1	0			0
	15	7	2009	31	0.364583	200931			51	6	2	35.6	87.4	0	1	1	0	TA160/100	m1m3	mabil	1	0			0
	3	8	2010	33		201033			51	6	1	36		0	1	1	0			magumbu	0	1			0
	25	12	2009	52		200952			52	6	1	37.2		0	1	0	1			a`frica do Sul	1	0			0
	10	7	2009	26	0.454861	200926			52	6	2	35.3	69.3	0	1	0	1	artrite m. Inf	6a6 7a3	koche	0	1			0
	11	7	2009	30	0.336806	200930			52	6	2	36.5	69.4	0	1	1	0	sindroma febre ht2	8k9 a5 7a3	koche	0	1	pf-	1	1		1
	16	10	2010	39		201039			52	6	2	36.2		0	1	0	1			miluge	1	0	pf-	1	1		1
	23	6	2009	23	0.445833	200923	z a		52	6	1	35.6	87.4	0	1	1	0	artrite m. Inf	8a3 6a6	panga	0	1			0
	12	8	2009	31	0.343056	200931			53	6	2	36.4	52.9	0	1	1	0	ht2 febre	8k9 7a3 a5	koche	0	1	pf+	1	1	1
	17	8	2010	31		201031			53	6	2	36		0	1	1	0			milige	1	0			0
	24	9	2009	38	0.317361	200938			53	6	2	36.1	56.2	0	1	1	0	gastrite	2a3	sambe	0	1			0
	25	3	2011	12		201112			54	6	2	36		0	1	1	0			Chandane	0	1			0
	27	6	2009	23	0.442361	200923			54	6	2	36.4	65.3	0	1	1	0	artrite joelhodeto	puncao	magumbu	0	1			0
	6	9	2009	39	0.444444	200939			54	6	2	35.9	86.6	0	1	1	0	artrite joelho esquerido	ibuprufen	maputo	1	0			0
	2	5	2011	18		201118			55	6	2	36		0	1	1	0			Koche	0	1			0
	15	2	2010	7	0.357639	201007	7143		55	6	2	36.7	53.9	0	1	1	0	infensao urinaria	8c14	macovane	1	0			0
	5	9	2009	36	0.426389	200936			55	6	2	37.1	54.9	0	1	0	1	bronquite anemia	8c15 6a6	maputo	1	0			0
	11	8	2009	34	0.322917	200934			56	6	2	35.5	65	0	1	1	0	gastrite malaria	2a3 8k9	koche	0	1			0
	20	5	2010	22		201022			56	6	1	36.6		0	1	0	1	malaria		Magumbo	0	1	pf+	1	1	1
	27	5	2010	22		201022			56	6	1	36.6		0	1	0	1			magumbu	0	1			0
	22	8	2010	31		201031			57	6	2	36.4		0	1	1	0			cumbana	1	0			0
	19	3	2011	12		201112			57	6	1	37		0	1	1	0	malaria		Magumbo	0	1	pf+	1	1	1
	27	6	2009	23	0.44375	200923			57	6	1	36.2	66.3	0	1	1	0	orquite dto	8a1 7a3	magumbu	0	1			0
	11	2	2010	7	0.364583	201007	7007		57	6	2	36.7	44	0	1	1	0	cefaleia	7a3 6a6	maxixe	1	0			0
	10	6	2009	25	0.350694	200925			58	6	2	35.5	64.8	0	1	1	0	ht2 anemias	6a6 7a3	koche	0	1			0
	13	2	2010	6	0.677083	201006			58	6	2	36	54.3	0	1	1	0	glicemia	transferido `a m`bene	m`bene	1	0			0
	14	12	2009	52		200952			58	6	2	36.7		0	1	0	1			m`bene	1	0			0
	18	3	2011	11		201111			58	6	1	37		0	1	1	0			magumbo	0	1			0
	4	9	2010	38		201038			58	6	1	36.7		0	1	1	0			magumbu	0	1			0
	18	12	2009	52		200952			58	6	1	36.8		0	1	1	0			murongue	1	0	10	1	0
	24	1	2010	1	0.302083	201001			59	6	1	36.5	80.6	0	1	0	1		8f1	a`frica do Sul	1	0			0
	25	12	2009	51		200951			59	6	1	37		0	1	1	0			a`frica do Sul	1	0			0
	14	2	2010	7	0.333333	201007			59	6	1	36.7	63.4	0	1	1	0	parasitose	8i3 2a3	m`bene	1	0			0
	27	6	2009	25	0.354167	200925			60	6	2	35	64.7	0	1	0	1	corpo estranho g	transferido	inhambane	1	0			0
	26	5	2010	19		201019			60	6	2	36		0	1	0	1			magumbu	0	1			0
	4	1	2010	2	0.338889	201002			60	6	1	37	64	0	1	1	0	control de malaria	8i3 6a6	maputo	1	0			0
	10	1	2010	1	0.311111	201001	z a		60	6	2	36.1	66.2	0	1	0	1	malaria	coarten 7a3	maxixe	1	0		1	0
	17	4	2011	15		201115			60	6	2	36		0	1	1	0			Morrumbene	1	0			0
	24	6	2009	23	0.472917	200923	zb		60	6	1	36.2	43.8	0	1	1	0	anemia artrite	6a6 d-3	panga	0	1			0
	24	3	2011	9		201109			61	6	2	36.1		0	1	1	0			tsandrane	0	1	pf+	1	1	1
	26	8	2010	35		201035			63	6	1	36.6		0	1	0	1			beira	1	0			0
	26	9	2010	37		201037			63	6	1	37.3		0	1	1	0			beira	1	0			0
	10	8	2010	33		201033			65	6	2	36.5		0	1	1	0			koche	0	1			0
	19	3	2010	12		201012			65	6	2	37.1		0	1	0	1	malaria		Magumbo	0	1	pf-	1	1		1
	3	8	2010	35		201035			65	6	2	36.7		0	1	1	0			magumbu	0	1			0
	19	12	2009	52		200952			66	6	2	36.9		0	1	1	0			macovane	1	0			0
	9	12	2009	52		200952			66	6	2	36.5		0	1					maputo	1	0			0
	11	3	2011	13		201113			66	6	1	37		0	1	1	0			Maxixe	1	0			0
	13	10	2010	42		201042			66	6	1	36.4		0	1	1	0			maxixe	1	0	pf-	1	1		1
	19	9	2010	38		201038			66	6	1	37.4		0	1	1	0			milige	1	0	pf-	1	1		1
	16	9	2010	38		201038			66	6	2	36		0	1	1	0			milige	1	0			0
	26	8	2010	31		201031			67	6	2	36.2		0	1	0	1			Bato 2	1	0			0
	12	8	2009	32	0.368056	200932			67	6	2	35.6	36.3	0	1	1	0	asma anemia	5a1 6a6	koche	0	1	pf+	1	1	1
	11	3	2011	11		201111			67	6	1	36.5		0	1	1	0			maxixe	1	0	pf-	1	1		1
	11	8	2010	31		201031			67	6	1	36.5		0	1	1	0			maxixe	1	0	pf-	1	1		1
	11	9	2010	35		201035			67	6	1	36.4		0	1	1	0			maxixe	1	0	pf-	1	1		1
	16	8	2010	33		201033			67	6	2	36.1		0	1	1	0			miluge	1	0			0
	10	6	2010	26		201026			68	6	1	36.2		0	1	1	0			Koche	0	1			0
	15	1	2010	1	0.305556	201001	7205		68	6	2	36		0	1	1	0	artrite M. Inf	o3	macovane	1	0			0
	11	3	2011	11		201111			68	6	2	37		0	1	0	1			maxixe	1	0			0
	4	1	2010	1	0.427083	201001	7638		69	6	2	37.1	57.5	0	1	0	1	cefaleia	7a3	maputo	1	0			0
	12	9	2009	37	0.329861	200937			73	6	1	36.4	67.6	0	1	0	1	Lombalgia/queda	14a3	koche	0	1			0
	15	10	2009	40	0.3375	200940			73	6	1	36.1	68.4	0	1	0	1	inf.urinaria e parasitose		koche	0	1	pf+	1	1	1
	6	10	2009	41	0.396528	200941			73	6	1	36.5	67.6	0	1	0	1	lombalgia		magumbu	0	1			0
	23	6	2009	23	0.436111	200923	7288		73	6	1	35.4	54.3	0	1	1	0	control cefaleia	7a3	panga	0	1			0
	27	8	2010	31		201031			75	6	2	37		0	1	1	0			inhambane	1	0			0
	22	2	2011	6		201106			75	6	1	36		0	1	0	1			magumbo	0	1			0
	20	7	2010	26		201026			75	6	1	36.9		0	1	0	1			Magumbo	0	1	pf-	1	1		1
	3	8	2010	33		201033			75	6	1	36		0	1	1	0			magumbu	0	1			0
	20	6	2009	23	0.354167	200923	7300		75	6	1	35.4	53.8	0	1	1	0	Hta 180/100 ht2	6a6 m1m3 anemia	panga	0	1			0
	10	6	2009	25	0.364583	200925			77	6	1	35.2	74.9	0	1	1	0	Hta 180/80	m1m3	koche	0	1			0
	25	8	2010	33		201033			78	6	1	36		0	1	0	1			chambone	0	1			0
	28	8	2010	33		201033			80	6	2	36		0	1	1	0			inhambane	1	0			0
	10	2	2011	6		201106			81	6	1	36.8		0	1	0	1			maxixe	1	0			0
	19	12	2009	52		200952			49	6	1	39.5		1	0	0	1			macovane	1	0			0
	11	7	2009	30		200930			54	6	1	38.7	65.8	1	0	1	0	bronquite	8d1 7a3	maxixe	1	0			0
	19	6	2010	24		201024	zb		71	6	2	38.1		1	0	1	0			macovane	1	0			0
	19	12	2009	52		200952			75	6	1	38		1	0	1	0			nhampossa	1	0			0
	14	8	2009	34	0.513889	200934			40	6	2		46.5			1	0	P.N	8a7	m`bene	1	0			0
	15	3	2009	13		200913	7285		40	6	2					1	0	ferida incisa	penso	macovane	1	0			0
	4	5	2011	21		201121			40	6	2					1	0			Maputo	1	0			0
	10	1	2011	2		201102			40	6	2					0	1			maxixe	1	0	0	1	1		1
	18	2	2011	7		201107	z a		41	6	1					1	0			magumbo	0	1			0
	12	1	2011	3		201103			42	6	2					1	0			m'bene	1	0	15	1	0
	13	12	2010	48		201048			42	6	2					0	1			maxixe	1	0			0
	23	6	2009	23	0.397917	200923			42	6	2	34.8	47.5			0	1	anemia cefaleia	6a6 7a3	panga	0	1			0
	19	4	2011	14		201114			44	6	2					0	1			Magumbo	0	1			0
	6	12	2010	49		201049			44	6	2					1	0			maputo	1	0			0
	18	11	2010	46		201046			45	6	2					1	0			koche	0	1			0
	10	1	2011	5		201105			45	6	1					0	1			maxixe	1	0			0
	17	11	2010	46		201046			46	6	1					1	0			koche	0	1			0
	5	1	2011	1		201101			47	6	1					1	0			koche	0	1	pf+	1	1	1
	2	4	2011	17		201117			47	6	1					1	0			Koche	0	1			0
	16	10	2010	43		201043			47	6	2					1	0			koche	0	1			0
	18	8	2009	34	0.625	200934			47	6	2	34.6	63.4			1	0	malaria	8k9 a5 7a3	mucucune	1	0		1	0
	19	3	2011	12		201112			50	6	2					1	0			Magumbo	0	1			0
	16	10	2010	42		201042			50	6	2					0	1			miluge	1	0			0
	9	12	2010	52		201052	z a		51	6	2					1	0			maputo	1	0			0
	24	12	2010	50		201050			52	6	1					1	0			a`frica do Sul	1	0			0
	13	11	2010	45		201045			52	6	2					1	0			m'bene	1	0			0
	28	12	2010	51		201051			52	6	2					1	0			magumbo	0	1			0
	25	12	2010	52		201052			52	6	1					1	0			magumbo	0	1	pf-	1	1		1
	27	6	2009	23	0.36875	200923			52	6	2	34.2	69.1			1	0	Ta 80/50 anemia	6a6 11a-19	magumbu	0	1			0
	3	11	2010	46		201046			52	6	2					0	1			magumbu	0	1	pf-	1	1		1
	6	12	2010	50		201050			52	6	1					1	0			maputo	1	0			0
	13	9	2010	38		201038			52	6	2					1	0			maxixe	1	0			0
	16	5	2011	19		201119			52	6	2					1	0			Miludji	1	0			0
	6	11	2010	47		201047			53	6	1					1	0			maputo	1	0	pf+	1	1	1
	24	10	2010	43		201043			53	6	2					1	0			tsandrane	0	1	pf+	1	1	1
	2	11	2010	46		201046			54	6	1					1	0			magumbu	0	1	pf-	1	1		1
	3	3	2011	12		201112			55	6	2					1	0			Koche	0	1			0
	14	8	2009	34	0.489583	200934			55	6	2	34	71.6			0	1	carie dentaria	7a3 8a1	m`bene	1	0			0
	24	11	2010	47		201047			56	6	1					0	1			a`frica do Sul	1	0			0
	1	1	2011	4		201104			57	6	2					1	0			koche	0	1			0
	21	12	2010	48		201048			58	6	2					1	0			Cocane2	1	0			0
	1	4	2011	15		201115			58	6	1					1	0			Koche	0	1	pf+	1	1	1
	10	12	2010	52		201052	7250		58	6	2					0	1			maputo	1	0			0
	11	5	2011	20		201120			60	6	2					0	1			Maxixe	1	0			0
	11	5	2011	21		201121			60	6	2					0	1			Maxixe	1	0			0
	12	11	2010	44		201044			62	6	2					0	1			m'bene	1	0			0
	22	12	2010	49		201049			62	6	2					1	0			magumbo	0	1			0
	20	4	2011	16		201116			65	6	2					1	0			Magumbo	0	1			0
	4	9	2010	38		201038			65	6	2					1	0			magumbu	0	1			0
	2	10	2010	43		201043			65	6	2					1	0			magumbu	0	1			0
	13	11	2010	45		201045	z a		67	6	2					1	0			m'bene	1	0			0
	10	1	2011	3		201103			67	6	1					1	0			maxixe	1	0			0
	19	12	2010	49		201049			68	6	2					1	0			koche	0	1			0
	23	12	2010	50		201050			68	6	2					1	0			rocha	0	1			0
	9	2	2011	9		201109			70	6	1					0	1			massinga	1	0			0
	11	9	2009	37		200937			73	6	1	33	65.4			0	1	artrite	14a3 8a7	koche	0	1			0
	17	11	2010	45		201045			77	6	1					0	1			mongwe	0	1	pf-	1	1		1
	17	1	2011	1		201101			78	6	1					0	1			mongwe	0	1			0
	23	12	2010	50		201050			90	6	1					1	0			rocha	0	1			0

## Sheet: analysis
	Age group	fever	no fever	propn w fever	used net	no net	propn using net	Tratamento	urban	rural	propn rural	Diagnosed	propn diagnosed	Confirmed	Neg	propn positive
< 1	1 Total	4	11	0.266667	21	4	0.84		16	10	0.615385	5	0.2	4	0	1
1 - 4	2 Total	25	43	0.367647	68	25	0.731183		49	44	0.526882	31	0.333333	16	4	0.8
5 - 9	3 Total	5	14	0.263158	18	10	0.642857		13	15	0.464286	5	0.178571	5	0	1
10 - 19	4 Total	10	23	0.30303	42	23	0.646154		28	37	0.430769	20	0.307692	12	4	0.75
20 -39	5 Total	16	144	0.1	170	67	0.7173		105	133	0.441176	74	0.312236	41	19	0.683333
> 40	6 Total	4	112	0.0344828	117	53	0.688235		87	84	0.508772	47	0.276471	20	18	0.526316
															< 1
															1 - 4
															5 - 9
															10 - 19
															20 -39
															> 40
